# Supplementary material for: Proteomic Analysis of Ovarian Cancer Cells Reveals Dynamic Processes of Protein Secretion and Shedding of Extra-Cellular Domains
Source: PLoS One. 2008 Jun 18;3(6):e2425. doi: 10.1371/journal.pone.0002425 (PMC2409963; doi:10.1371/journal.pone.0002425)
Supplement: Table S1 — Proteomic analysis of ovarian cancer cell lines and tumor cells purified from ascites fluid. (1.75 MB XLS) [file pone.0002425.s002.xls]

## Sheet: TABLE S1
Table S1. Proteomic analysis of ovarian cancer cell lines and tumor cells purified from ascites fluid.
		# ENRICHED PROTEIN				1203	647				675	978				563	1077				1049	1241
		TOTAL # PROTEIN	3410	2003	1093			2963	1104	1556			3114	898	1690			2856	1690	1727
		NORMALIZATION	1	0.309799	0.176883			1	0.200951	0.374368			1	0.134673	0.396121			1	0.403491	0.695481
		TOTAL COUNTS	86611	26832	15320			62687	12597	23468			56715	7638	22466			41426	16715	28811
			OVCAR3					CaOV3					ES2					ASCITES CANCER CELLS
One_IPI	Gene Name	Description	Total Extract Counts	Secreted Counts	Cell Surface Counts	Secreted / Total Extract	Surface / Total Extract	Total Extract Counts	Secreted Counts	Cell Surface Counts	Secreted / Total Extract	Surface / Total Extract	Total Extract Counts	Secreted Counts	Cell Surface Counts	Secreted / Total Extract	Surface / Total Extract	Total Extract Counts	Secreted Counts	Cell Surface Counts	Secreted / Total Extract	Surface / Total Extract	Celular Location	TMHMM	SignalP _ Prob	in Plasma?
IPI00000001	STAU1	Splice Isoform Long of Double-stranded RNA-binding protein Staufen homolog 1	32	3		0.323748		18					3					15	4	2	0.682093	0.242232	Cytoplasm	0	0.001
IPI00000005	NRAS	GTPase NRas precursor	12					1					21		1		0.160204	1					Plasma Membrane	0	0.08
IPI00000006	HRAS	GTPase HRas precursor						1															Plasma Membrane	0	0.08
IPI00000013	CTSL2	Cathepsin L2 precursor	4	49		31.8334			7		35.8344								1		3.47837		Extracellular Space	0	1
IPI00000015	SFRS4	Splicing factor, arginine/serine-rich 4	2										3										Nucleus	0	0
IPI00000024	PCDH1	Splice Isoform 1 of Protocadherin 1 precursor		1		4.2279		5															Plasma Membrane	1	0.999
IPI00000030	PPP2R5D	Splice Isoform Delta-1 of Serine/threonine protein phosphatase 2A, 56 kDa regulatory subunit, delta isoform						18	1		0.314544		4										Nucleus	0	0
IPI00000041	RHOB	Rho-related GTP-binding protein RhoB	19					10		4		1.06224	8										Cytoplasm	0	0.011	Yes
IPI00000044	PDGFB	Platelet-derived growth factor B chain precursor		1		4.2279																	Extracellular Space	0	1	Yes
IPI00000045	IL1RN	Splice Isoform 1 of Interleukin-1 receptor antagonist protein precursor																	13		33.2188		Extracellular Space	0	0.983
IPI00000051	PFDN1	Prefoldin subunit 1	6		1		0.950494	2					3										Cytoplasm	0	0	Yes
IPI00000059	CD58	LFA-3	1																				Plasma Membrane	2	0.955
IPI00000060	GNG5ps	Guanine nucleotide-binding protein G(I)/G(S)/G(O) gamma-5-like subunit	2										3										Unknown	0	0.006
IPI00000070	LDLR	Low-density lipoprotein receptor precursor		5		17.1395			1		5.97634		4		2		1.20979	2					Plasma Membrane	1	0.999
IPI00000075	TGFB1	Transforming growth factor beta 1 precursor							1		5.97634							4					Extracellular Space	0	0.999	Yes
IPI00000077	RNASEH1	Ribonuclease H1						1							2		6.04896						Extracellular Space	0	0.97
IPI00000104	RNGTT	Splice Isoform 1 of mRNA capping enzyme	2																				Nucleus	0	0.001	Yes
IPI00000105	MVP	Major vault protein	6					78	4	8	0.264625	0.283156	8		1		0.391609	72	6	78	0.2174	1.55004	Nucleus	0	0
IPI00000115	CNIH4	Splice Isoform 1 of Cornichon homolog 4																		4		6.75141	Plasma Membrane	3	0.55
IPI00000137	GNPTG	N-acetylglucosamine-1-phosphotransferase, gamma subunit precursor																3					Extracellular Space	0	1	Yes
IPI00000138	MGAT1	Alpha-1,3-mannosyl-glycoprotein 2-beta-N-acetylglucosaminyltransferase						1										7	4	17	1.36419	3.18044	Plasma Membrane	1	0.928	Yes
IPI00000149	CASP8	Splice Isoform 1 of Caspase-8 precursor						1					1										Nucleus	0	0
IPI00000151	ITGB6	Integrin beta-6 precursor																3	1	32	0.869593	11.7528	Plasma Membrane	1	0.958	Yes
IPI00000155	N-PAC	Cytokine-like nuclear factor n-pac																8	1	2	0.386486	0.430634	Unknown	0	0.007	Yes
IPI00000156	LIG3	Ligase III, DNA, ATP-dependent isoform beta precursor	4										1										Nucleus	0	0.035	Yes
IPI00000163	CTNNAL1	Splice Isoform 3 of Alpha-catulin													1		3.52448						Plasma Membrane	0	0.354
IPI00000171	TSC22D4	TSC22 domain family protein 4	2					6										3					Nucleus	0	0.001
IPI00000173	LRCH4	Leucine-rich repeats and calponin homology domain containing protein 4																		3		5.31356	Plasma Membrane	1	0.891
IPI00000178	NSMCE1	HSPC337	1																	1		2.43785	Unknown	0	0.88
IPI00000181	MRPS24	Mitochondrial 28S ribosomal protein S24											2										Cytoplasm	0	0.831
IPI00000184	SCOC	HRIHFB2072 protein	6					5					2					3					Cytoplasm	0	0.301
IPI00000190	CD81	CD81 antigen	2	1		1.4093		1		1		1.83558	1		3		4.28672			4		6.75141	Plasma Membrane	4	0.093
IPI00000192	SON	Splice Isoform F of SON protein						3					2	1		2.80846		6		2		0.553672	Nucleus	0	0	Yes
IPI00000207	DDX24	HSPC328	1					3					3										Nucleus	0	0.006
IPI00000230	TPM1	Hypothetical protein DKFZp586K2222	43		7		0.922141	16					25										Cytoplasm	0	0	Yes
IPI00000265	C10orf38	Hypothetical protein C10orf38													2		6.04896						Plasma Membrane	1	0.999	Yes
IPI00000279	ZC3H15	Hypothetical protein LEREPO4	6					4					4		4		2.21959	1		1		1.21893	Nucleus	0	0
IPI00000296	C3orf10	HSPC300											3					1					Unknown	0	0	Yes
IPI00000305	MED11	Similar to HSPC296	1																				Nucleus	0	0
IPI00000330	C9orf80	HSPC043 protein											2										Unknown	0	0
IPI00000335	HINT2	Histidine triad nucleotide-binding protein 2	15	2		0.465987		20					5	1		1.40423		8					Extracellular Space	0	0.992	Yes
IPI00000398	NUSAP1	Liver nuclear protein	2					2					3										Nucleus	0	0
IPI00000425	ATP6V0A2	Vacuolar proton translocating ATPase 116 kDa subunit a isoform 2						1							1		3.52448			3		5.31356	Plasma Membrane	6	0.945
IPI00000436	CDH22	Cadherin-22 precursor																1					Plasma Membrane	1	0.991	Yes
IPI00000455	KIF3A	Kinesin-like protein KIF3A	3																				Cytoplasm	0	0
IPI00000463	ADPRHL2	HPHase	12	4	1	1.07012	0.511805	13	1		0.426881		1					1	6	1	7.93512	1.21893	Cytoplasm	0	0.415
IPI00000477	ARPC2	PNAS-139	76	7		0.306432		25	1	6	0.229859	0.654885	18		2		0.318366	24	10		1.03135		Cytoplasm	0	0
IPI00000494	RPL5	60S ribosomal protein L5	58	10	7	0.564051	0.687699	50		12		0.648118	58		23		1.00107	15	2	1	0.372297	0.152366	Cytoplasm	0	0	Yes
IPI00000495	PCID1	PNAS-125	13	3		0.763121		4		1		0.734234	4	1		1.68507							Unknown	0	0	Yes
IPI00000581	OTUB1	Hypothetical protein DKFZp564E242	49	18	7	1.18204	0.811484	37	3	4	0.419185	0.307492	14		5		0.90816	2					Unknown	0	0
IPI00000606	TTC4	Tetratricopeptide repeat protein 4	5										3										Unknown	0	0
IPI00000634	CCDC6	Coiled-coil domain-containing protein 6	21					6					9					7		5		1.02366	Cytoplasm	0	0
IPI00000643	BAG2	BAG family molecular chaperone regulator 2	4		1		1.33069	15	1	3	0.373521	0.563344	9		2		0.604896						Cytoplasm	0	0
IPI00000684	UAP1	Splice Isoform AGX2 of UDP-N-acetylhexosamine pyrophosphorylase											39	11	6	2.06698	0.403672						Nucleus	0	0	Yes
IPI00000685	CDK7	Cell division protein kinase 7	1												1		3.52448			1		2.43785	Nucleus	0	0
IPI00000686	RBM19	Probable RNA-binding protein 19																1					Nucleus	0	0.012
IPI00000690	AIFM1	Splice Isoform 1 of Programmed cell death protein 8, mitochondrial precursor	35	11	2	1.01408	0.341859	8		1		0.407908	2		2		2.01632	68	3	32	0.122248	0.681323	Cytoplasm	0	0.03
IPI00000691	CLDN1	Claudin-1	2	2	2	2.48527	4.10231			1		3.67117			1		3.52448			10		15.3785	Plasma Membrane	4	0.961	Yes
IPI00000692	CLIC3	Chloride intracellular channel protein 3						2															Nucleus	0	0.001
IPI00000695	GNA14	Guanine nucleotide-binding protein, alpha-14 subunit						3															Plasma Membrane	0	0
IPI00000728	USP15	Splice Isoform 1 of Ubiquitin carboxyl-terminal hydrolase 15	1	1		2.11395																	Cytoplasm	0	0	Yes
IPI00000733	UTP18	WD-repeat protein 50											3										Nucleus	0	0.001
IPI00000736	TSPAN15	Tetraspanin-15		2		7.4558														3		5.31356	Plasma Membrane	4	0.002
IPI00000760	DDAH2	NG,NG-dimethylarginine dimethylaminohydrolase 2	10	4		1.26469		10	4	11	1.90049	2.76208	2	9		22.6095		1	11		14.131		Unknown	0	0.008	Yes
IPI00000783	PSMB8	Splice Isoform 1 of Proteasome subunit beta type 8 precursor	9					8										12	4		0.839499		Cytoplasm	0	0.001	Yes
IPI00000784	MEF2D	Splice Isoform MEF2DAB of Myocyte-specific enhancer factor 2D	1																				Nucleus	0	0
IPI00000787	PSMB9	Splice Isoform LMP2.L of Proteasome subunit beta type 9 precursor						2												2		3.87571	Cytoplasm	0	0.001
IPI00000792	CRYZ	Quinone oxidoreductase	33	6		0.599041		2					19		3		0.428672	4					Cytoplasm	0	0
IPI00000793	HLA-DMB	HLA class II histocompatibility antigen, DM beta chain precursor																7					Plasma Membrane	1	0.998
IPI00000811	PSMB6	Proteasome subunit beta type 6 precursor	20	3		0.508748		3					12		5		1.04788						Cytoplasm	0	0.605	Yes
IPI00000816	YWHAE	14-3-3 protein epsilon	241	35	23	0.470977	0.541445	151	50	21	1.64353	0.375622	137	16	3	0.868159	0.0621264	18	17	33	2.27012	2.54996	Cytoplasm	0	0	Yes
IPI00000821	MRPL16	Mitochondrial ribosomal protein L16	8							1		3.67117						1					Unknown	0	0.949
IPI00000845	DTNA	Splice Isoform 1 of Dystrobrevin alpha	1																				Plasma Membrane	0	0	Yes
IPI00000846	CHD4	Splice Isoform 1 of Chromodomain helicase-DNA-binding protein 4	14	7		1.57302				4		11.6847	24		4		0.443917	10		2		0.352337	Nucleus	0	0.003	Yes
IPI00000856	PLEKHC1	Splice Isoform 1 of Pleckstrin homology domain containing family C member 1											3										Cytoplasm	0	0
IPI00000858	RDBP	Splice Isoform 1 of Negative elongation factor E						1					13					6					Nucleus	0	0
IPI00000860	FMOD	Fibromodulin precursor							3		15.929												Extracellular Space	0	1
IPI00000861	LASP1	Splice Isoform 1 of LIM and SH3 domain protein 1	12	7		1.81502		10					26	2	3	0.587065	0.317535	26	4	7	0.404203	0.409814	Cytoplasm	0	0	Yes
IPI00000868	MATK	Megakaryocyte-associated tyrosine-protein kinase								1		3.67117											Cytoplasm	0	0.461	Yes
IPI00000873	VARS	Valyl-tRNA synthetase	71	21	6	0.95536	0.485011	30		18		1.58326	59	1	57	0.140423	2.41492		2		5.95675		Cytoplasm	0	0.028	Yes
IPI00000874	PRDX1	Peroxiredoxin 1	214	20	155	0.304921	4.0804	94	16	25	0.848646	0.713466	120	10	12	0.621932	0.258626	33	7	30	0.539665	1.29811	Cytoplasm	0	0	Yes
IPI00000875	EEF1G	Elongation factor 1-gamma	198	82	57	1.33511	1.62436	104	39	39	1.85788	1.00167	103	14	65	1.00918	1.58742	27	17	14	1.54044	0.754641	Cytoplasm	0	0.053
IPI00000877	HYOU1	150 kDa oxygen-regulated protein precursor	60	20		1.07472		60	9	2	0.750607	0.103973	40		1		0.085963	79	8	6	0.260337	0.120339	Plasma Membrane	1	0.981	Yes
IPI00000893	ZFP36	Tristetraproline	1																				Nucleus	0	0.003
IPI00000948	TBL2	Transducin beta-like 2 protein	1					2										6	2		0.850964		Plasma Membrane	1	0.985
IPI00000980	TOMM7	Probable mitochondrial import receptor subunit TOM7 homolog	4																				Plasma Membrane	1	0.068
IPI00001007	MSI1	RNA-binding protein Musashi homolog 1	5					3															Cytoplasm	0	0
IPI00001022	PNKD	FKSG19	2												4		11.0979						Plasma Membrane	1	0.423
IPI00001091	AFG3L2	AFG3-like protein 2	14					6					7		2		0.75612	2		9		4.64689	Plasma Membrane	2	0.272
IPI00001134	RBM7	Hypothetical protein FLJ11153	2					1										2					Unknown	0	0
IPI00001146	LSM6	U6 snRNA-associated Sm-like protein LSm6	9					1					1										Nucleus	0	0
IPI00001159	GCN1L1	GCN1-like protein 1	3	3		2.67092				23		62.4369	10		22		5.13987						Cytoplasm	0	0	Yes
IPI00001364	C21orf66	Splice Isoform A of GC-rich sequence DNA-binding factor homolog		1		4.2279												1					Nucleus	0	0	Yes
IPI00001458	KNTC1	Kinetochore-associated protein 1											1		1		1.76224	1					Nucleus	0	0	Yes
IPI00001466	EML4	Echinoderm microtubule-associated protein-like 4	24	1		0.169116		15					2					3	1	2	0.869593	0.968927	Cytoplasm	0	0
IPI00001477	DDR1	Splice Isoform 1 of Epithelial discoidin domain receptor 1 precursor	4	1	1	0.84558	1.33069	1		5		7.17792							2		5.95675		Plasma Membrane	1	1
IPI00001498	PCDHA2	Splice Isoform 1 of Protocadherin alpha 2 precursor																		1		2.43785	Extracellular Space	0	1	Yes
IPI00001538	FXC1	Mitochondrial import inner membrane translocase subunit TIM9 B	7															1					Cytoplasm	0	0
IPI00001539	ACAA2	3-ketoacyl-CoA thiolase, mitochondrial	11					28										97	15	8	0.389547	0.12758	Cytoplasm	0	0.074
IPI00001541	TIMM9	Mitochondrial import inner membrane translocase subunit TIM9 A	10	1	1	0.384355	0.60486	2					3					3					Cytoplasm	0	0
IPI00001543	TIMM10	Mitochondrial import inner membrane translocase subunit TIM10	14		3		1.19736											7					Cytoplasm	0	0
IPI00001545	WAS	Wiskott-Aldrich syndrome protein																2		1		0.812618	Cytoplasm	0	0.001
IPI00001546	TIMM8B	Mitochondrial import inner membrane translocase subunit TIM8 B	4		2		2.46138																Cytoplasm	0	0
IPI00001560	CDKN2A	Splice Isoform 1 of Cyclin-dependent kinase inhibitor 2A, isoforms 1/2/3	12		3		1.38157	6					8										Nucleus	0	0.006	Yes
IPI00001568	ATP6V1D	Vacuolar ATP synthase subunit D	2					5										3					Cytoplasm	0	0	Yes
IPI00001576	ZBED2	Zinc finger, BED domain containing 2	1																				Unknown	0	0
IPI00001578	C17orf62	Hypothetical protein MGC4368																		2		3.87571	Plasma Membrane	1	0.464
IPI00001580	FYCO1	Hypothetical protein	3																				Unknown	0	0	Yes
IPI00001589	TIMM13	Mitochondrial import inner membrane translocase subunit TIM13	20	2	9	0.355038	2.47053	3					3					2		1		0.812618	Cytoplasm	0	0	Yes
IPI00001592	GPNMB	Splice Isoform 2 of Transmembrane glycoprotein NMB precursor	2							5		14.3558						3					Plasma Membrane	1	0.965	Yes
IPI00001593	PRCP	Lysosomal Pro-X carboxypeptidase precursor	1	2		3.7279		3	9		11.4468				1		3.52448	1					Plasma Membrane	1	1
IPI00001597	LOXL1	Lysyl oxidase homolog 1 precursor		3		10.6837								11		82.6791			1		3.47837		Extracellular Space	0	0.998	Yes
IPI00001600	C16orf53	Hypothetical protein C16orf53						1					2										Unknown	0	0.005
IPI00001610	IGF1	Insulin-like growth factor IA precursor		2		7.4558																	Extracellular Space	0	0.844	Yes
IPI00001611	IGF2	Splice Isoform 1 of Insulin-like growth factor II precursor																1	8		10.4135		Extracellular Space	0	0.998	Yes
IPI00001617	SOX4	Transcription factor SOX-4								1		3.67117	2										Nucleus	0	0
IPI00001632	KIAA1522	HypotHetical protein LOC57648	5	1		0.70465		14	1		0.398423												Unknown	0	0.096	Yes
IPI00001636	ATXN10	Ataxin-10	3	2		1.86395		11	1	2	0.498028	0.528528	2		4		3.69931			3		5.31356	Cytoplasm	0	0.104
IPI00001639	KPNB1	Importin beta-1 subunit	56	35	25	1.99959	2.49713	36	2	56	0.296018	4.06988	67	4	36	0.451493	1.3512	5	3	40	1.40585	9.75236	Nucleus	0	0	Yes
IPI00001655	C16orf80	Transcription factor IIB		1		4.2279		1		1		1.83558			2		6.04896						Nucleus	0	0.089	Yes
IPI00001661	RCC1	RCC1 protein	25	2	1	0.286762	0.255902	11					3		1		0.88112	24	5		0.535675		Nucleus	0	0
IPI00001663	HTRA2	Splice Isoform 1 of Serine protease HTRA2, mitochondrial precursor						2															Plasma Membrane	1	0.598
IPI00001676	NPLOC4	Similar to NPL4	29	2		0.248527		29	3	5	0.530967	0.478528	17		5		0.7568	8	4	39	1.21261	6.34181	Nucleus	0	0
IPI00001699	PYCARD	Splice Isoform 1 of Apoptosis-associated speck-like protein containing a CARD	3					12	1	5	0.459718	1.1043						3					Cytoplasm	0	0
IPI00001710	C11orf2	Splice Isoform 1 of Protein C11orf2								1		3.67117											Unknown	0	0.043
IPI00001716	PUS1	tRNA pseudouridine synthase A	1										3										Nucleus	0	0
IPI00001730	FHOD1	FH1/FH2 domain-containing protein						2					5		4		1.84965						Nucleus	0	0	Yes
IPI00001734	PSAT1	Splice Isoform 1 of Phosphoserine aminotransferase	113	24	19	0.68833	0.951015	12		8		1.72072	27	1	11	0.300906	1.02747						Cytoplasm	0	0
IPI00001735	NCOR2	Nuclear receptor co-repressor 2	4										1		2		3.02448	3					Nucleus	0	0.001	Yes
IPI00001738	NUP88	Nuclear pore complex protein Nup88											2										Nucleus	0	0
IPI00001753	MYH4	Myosin-4																	5		13.3919		Plasma Membrane	0	0	Yes
IPI00001754	F11R	Junctional adhesion molecule A precursor	20	11	19	1.73842	5.16265	7	1	9	0.747042	3.13007			4		11.0979	11	5	8	1.11599	1.0419	Plasma Membrane	2	0.993
IPI00001755	GPC6	Glypican-6 precursor																		5		8.18927	Extracellular Space	0	0.999
IPI00001757	RBM8A	Splice Isoform 1 of RNA-binding protein 8A	2	3	3	3.56123	5.98679	1	7		17.9172		11	1	5	0.702114	1.1352						Nucleus	0	0
IPI00001759	OLR1	Oxidized low-density lipoprotein receptor 1						1										2					Plasma Membrane	1	0
IPI00001762	OPHN1	Oligophrenin 1		1		4.2279																	Cytoplasm	0	0
IPI00001786	USP36	USP36 protein											1										Nucleus	0	0	Yes
IPI00001793	RFNG	Beta-1,3-N-acetylglucosaminyltransferase radical fringe		1		4.2279														1		2.43785	Plasma Membrane	1	0.982	Yes
IPI00001835	ZBTB4	Zinc finger and BTB domain-containing protein 4											1										Nucleus	0	0	Yes
IPI00001869	PAPPA	Pappalysin-1 precursor																1					Extracellular Space	0	1	Yes
IPI00001871	PAWR	PRKC apoptosis WT1 regulator protein	1	1	2	2.11395	6.15346	7	2		1.36908		3	1		2.10634		2	2		1.98558		Nucleus	0	0
IPI00001883	SNX9	Sorting nexin-9						5					4										Cytoplasm	0	0
IPI00001890	COPG	Coatomer gamma subunit	4	3		2.13674		5	3	43	2.65484	19.31	36		10		0.709319	14	17	13	2.87549	1.31281	Cytoplasm	0	0	Yes
IPI00001891	AUP1	Splice Isoform Long of Ancient ubiquitous protein 1 precursor						2										4					Plasma Membrane	2	0.007
IPI00001893	PCDH7	Splice Isoform A of Protocadherin 7 precursor													3		8.57344			1		2.43785	Plasma Membrane	2	1	Yes
IPI00001914	FKBP7	Splice Isoform 1 of FK506-binding protein 7 precursor						1					1										Plasma Membrane	1	0.537
IPI00001922	ST14	Suppressor of tumorigenicity 14	15	11	6	2.28168	2.18255	1		2		3.17117							2	2	5.95675	3.87571	Plasma Membrane	1	0
IPI00001952	ENDOD1	Probable endonuclease KIAA0830 precursor			1		6.65346																Plasma Membrane	3	0.998
IPI00001955	MORF4	Transcription factor-like protein MORF4						5															Nucleus	0	0
IPI00001960	CLIC4	Chloride intracellular channel protein 4	27	8		0.957971		14	5	1	1.72545	0.244745	21	3		1.05801		4	2		1.19135		Cytoplasm	0	0
IPI00002013	TCEAL2	Brain my048 protein						1		3		4.50675											Unknown	0	0
IPI00002054	ZNF687	KIAA1441 protein																2					Unknown	0	0.452
IPI00002134	PSMD5	26S proteasome non-ATPase regulatory subunit 5	20	12	3	1.89213	0.855256	21	1	10	0.271652	1.25962	5		2		1.00816						Cytoplasm	0	0.012	Yes
IPI00002135	TACC3	Transforming acidic coiled-coil-containing protein 3	10					6	1		0.853763		10										Nucleus	0	0
IPI00002142	PCDH10	Protocadherin 10 precursor						1												2		3.87571	Plasma Membrane	1	1	Yes
IPI00002149	SAR1B	GTP-binding protein SAR1b	8					11							2		6.04896						Unknown	0	0.004
IPI00002186	ARFGEF2	Brefeldin A-inhibited guanine nucleotide-exchange protein 2																		4		6.75141	Cytoplasm	0	0.001	Yes
IPI00002188	ARFGEF1	Brefeldin A-inhibited guanine nucleotide-exchange protein 1													1		3.52448		1	1	3.47837	2.43785	Cytoplasm	0	0	Yes
IPI00002203	BCCIP	BRCA2 and CDKN1A-interacting protein, isoform BCCIPbeta	5	2		1.24263		8					10		1		0.320407	1					Nucleus	0	0
IPI00002212	STK24	Splice Isoform B of Serine/threonine-protein kinase 24	7					6		1		0.524453	8					4	2		1.19135		Cytoplasm	0	0.047
IPI00002214	KPNA2	Importin alpha-2 subunit	12	3	3	0.821823	1.38157	33	3	7	0.4685	0.579358	4		7		3.73427	1	3	6	4.21756	4.81356	Nucleus	0	0
IPI00002230	AADACL1	Arylacetamide deacetylase-like 1						17		17		2.57833	7		6		2.01836	5	2	6	0.992791	1.60452	Plasma Membrane	1	0.033
IPI00002236	MFGE8	Lactadherin precursor						4	6	2	6.17161	1.26847						1					Extracellular Space	0	1
IPI00002243	GGTLA1	Splice Isoform 1 of Gamma-glutamyltransferase 5 precursor													3		8.57344						Plasma Membrane	1	0.766
IPI00002245	FLJ21963	Hypothetical protein FLJ21963																1					Unknown	0	0.449
IPI00002252	CD68	Splice Isoform Long of Macrosialin precursor																	2		5.95675		Plasma Membrane	1	1
IPI00002255	LRBA	Lipopolysaccharide-responsive and beige-like anchor protein	2							12		33.054							1	1	3.47837	2.43785	Cytoplasm	0	0	Yes
IPI00002270	C6orf211	Chromosome 6 open reading frame 211	2					2															Unknown	0	0.021	Yes
IPI00002280	PCSK1N	ProSAAS precursor							3		15.929												Plasma Membrane	1	0.999	Yes
IPI00002311	SCRN3	Secernin 3	1																				Unknown	0	0
IPI00002316	IL17C	Interleukin-17C precursor																	3		8.43512		Extracellular Space	0	1
IPI00002324	MAT2B	Methionine adenosyltransferase II, beta, isoform 1	13					12		1		0.282398	6					3					Cytoplasm	0	0
IPI00002335	HD	Huntingtin								1		3.67117		2	2	15.8507	6.04896			3		5.31356	Cytoplasm	0	0	Yes
IPI00002336	ARMC7	Hypothetical protein FLJ22160						1		1		1.83558											Unknown	0	0.021
IPI00002349	NUFIP2	FMRP interacting protein, 82kD	5					4					3					1					Unknown	0	0
IPI00002353	RGAG1	KIAA1318 protein													1		3.52448						Unknown	0	0.051	Yes
IPI00002372	ABCD3	ATP-binding cassette sub-family D member 3		3		10.6837		2		7		6.56606	2					2	1		1.15946		Plasma Membrane	3	0.963
IPI00002375	TMOD1	Tropomodulin-1						1										1					Cytoplasm	0	0
IPI00002406	BCAM	Lutheran blood group glycoprotein precursor	112	81	201	2.32265	10.065	35	21	47	2.93064	3.51514			12		31.2938	22	64	94	6.93982	5.91992	Plasma Membrane	1	0.999
IPI00002408	FLJ21908	Hypothetical protein FLJ21908	5																				Unknown	0	0	Yes
IPI00002411	IKBKG	NF-kappa-B essential modulator	2					3					5										Nucleus	0	0.002
IPI00002412	PPT1	Palmitoyl-protein thioesterase 1 precursor	26	10		1.23256		31	27		4.23003		2	3		7.75871		14	3		0.562341		Extracellular Space	0	1
IPI00002424	PLEKHF2	Hypothetical protein FLJ13187	7																				Unknown	0	0
IPI00002436	CNOT4	Splice Isoform 5 of CCR4-NOT transcription complex subunit 4						1					1										Unknown	0	0	Yes
IPI00002441	SDC1	Syndecan-1 precursor			1		6.65346	3	1		1.49408								1		3.47837		Plasma Membrane	1	1	Yes
IPI00002459	ANXA6	Annexin VI isoform 2	18	1		0.222521		56	5	2	0.454065	0.111269	48					16	9	1	1.3709	0.143403	Plasma Membrane	0	0	Yes
IPI00002460	ANXA7	Splice Isoform 1 of Annexin A7	19	4		0.69558		18	1		0.314544		30		2		0.195128	7	2	1	0.744593	0.304732	Plasma Membrane	0	0
IPI00002478	ECE1	Splice Isoform B of Endothelin-converting enzyme 1																5	1	1	0.579729	0.406309	Plasma Membrane	1	0.911	Yes
IPI00002483	SLC30A1	Zinc transporter 1		1		4.2279				1		3.67117							2	7	5.95675	11.065	Plasma Membrane	6	0.881
IPI00002491	SORBS1	Splice Isoform 9 of Sorbin and SH3 domain-containing protein 1						1															Plasma Membrane	0	0	Yes
IPI00002495	EPN1	Splice Isoform 1 of Epsin-1	3					5					5					4					Plasma Membrane	0	0
IPI00002496	GMPPB	Hypothetical protein FLJ14257	16					4					3					2					Unknown	0	0.304
IPI00002508	ONECUT1	Hepatocyte nuclear factor 6	1																				Nucleus	0	0.002	Yes
IPI00002519	SHMT1	Splice Isoform 1 of Serine hydroxymethyltransferase, cytosolic	30	7		0.761139		11					9					4	2		1.19135		Cytoplasm	0	0
IPI00002520	SHMT2	Serine hydroxymethyltransferase, mitochondrial precursor	49	7		0.471906		22					20	2	3	0.754797	0.408259	22	2		0.258989		Cytoplasm	0	0.147
IPI00002521	ATP5J	ATP synthase coupling factor 6, mitochondrial precursor	18	1		0.222521		30					10		1		0.320407	25	2	2	0.229106	0.149066	Cytoplasm	0	0.084	Yes
IPI00002525	NENF	Neudesin precursor		5		17.1395		1	4		10.4527		2					4					Extracellular Space	0	1	Yes
IPI00002535	FKBP2	FK506-binding protein 2 precursor	20	9	2	1.431	0.586044	13	4		1.49324		8					13	2	3	0.425482	0.37954	Extracellular Space	0	0.997
IPI00002548	SALF	Stonin-1		1		4.2279																	Unknown	0	0
IPI00002551	ANAPC4	Splice Isoform 1 of Anaphase promoting complex subunit 4																		4		6.75141	Unknown	0	0.005
IPI00002552	AP1M2	Splice Isoform 1 of Adaptor-related protein complex 1, mu 2 subunit																2		1		0.812618	Cytoplasm	0	0.004
IPI00002557	COPG2	Coatomer gamma-2 subunit								8		22.3694	17	2	5	0.880597	0.7568			1		2.43785	Cytoplasm	0	0
IPI00002560	NUMBL	Numb-like protein																	1		3.47837		Cytoplasm	0	0.005
IPI00002564	XRCC1	DNA-repair protein XRCC1	5										2					5	1		0.579729		Nucleus	0	0.003
IPI00002569	EIF4EBP1	Eukaryotic translation initiation factor 4E-binding protein 1	4										46	12		1.91712							Cytoplasm	0	0.001
IPI00002570	EIF4EBP2	Eukaryotic translation initiation factor 4E-binding protein 2	4										2										Cytoplasm	0	0.003
IPI00002580	PIK3C2A	Phosphatidylinositol-4-phosphate 3-kinase C2 domain-containing alpha polypeptide											1										Cytoplasm	0	0
IPI00002591	PIK4CB	Splice Isoform 1 of Phosphatidylinositol 4-kinase beta												1		8.42537							Cytoplasm	0	0	Yes
IPI00002614	UVRAG	UV radiation resistance-associated gene protein																	2		5.95675		Nucleus	0	0.18
IPI00002618	ABCD2	ATP-binding cassette sub-family D member 2											1										Cytoplasm	0	0.553
IPI00002624	PLRG1	Splice Isoform 1 of Pleiotropic regulator 1	2					7	1		0.747042		6		1		0.503497	13					Nucleus	0	0
IPI00002647	WASF2	Wiskott-Aldrich syndrome protein family member 4								1		3.67117											Unknown	0	0
IPI00002649	PNN	Splice Isoform 2 of Pinin											3					7					Plasma Membrane	0	0.001
IPI00002707	SPAST	Splice Isoform 1 of Spastin	3																				Plasma Membrane	1	0.002
IPI00002714	DKK3	Dickkopf-related protein 3 precursor		10		33.279			15		75.6451			21	15	156.933	38.8672						Extracellular Space	0	1	Yes
IPI00002732	EXTL2	Exostosin-like 2		6		20.3674			1		5.97634			2		15.8507							Plasma Membrane	1	0.537	Yes
IPI00002745	CTSZ	Cathepsin Z precursor	5					2	17	4	28.5326	3.89489	2		5		4.5408	18	4	1	0.574394	0.128308	Plasma Membrane	1	1	Yes
IPI00002790	SEL1L	Splice Isoform 1 of Sel-1 homolog precursor	11							1		3.67117						7	3	3	1.05439	0.664195	Plasma Membrane	1	1
IPI00002802	LOX	Protein-lysine 6-oxidase precursor											9	15	4	11.2381	1.10979		1		3.47837		Extracellular Space	0	1	Yes
IPI00002816	CTSF	Cathepsin F precursor																		1		2.43785	Extracellular Space	0	1
IPI00002818	KLK11	Splice Isoform 1 of Kallikrein-11 precursor		1		4.2279													4		10.9135		Extracellular Space	0	0.999
IPI00002821	RPL14	60S ribosomal protein L14	15	15	12	3.08866	4.30259	9		13		3.57252	26					4					Cytoplasm	0	0.007	Yes
IPI00002824	CSRP2	Cysteine and glycine-rich protein 2	3	1	1	1.05697	1.66336	5		4		1.94745	8					4					Nucleus	0	0.001	Yes
IPI00002831	SAP30L	Hypothetical protein FLJ11526																2					Unknown	0	0.001
IPI00002848	SNAPC1	snRNA-activating protein complex subunit 1	2																				Nucleus	0	0
IPI00002853	PPP2R5E	Serine/threonine protein phosphatase 2A, 56 kDa regulatory subunit, epsilon isoform	4					4					3										Cytoplasm	0	0
IPI00002856	STEAP4	Hypothetical protein FLJ23153						42		40		2.50806											Plasma Membrane	1	0	Yes
IPI00002857	MAPK14	Mitogen-activated protein kinase 14 isoforM 2	8	1		0.469767		4					10	2		1.44098							Cytoplasm	0	0	Yes
IPI00002894	POLD1	DNA polymerase delta catalytic subunit						2							1		3.52448						Nucleus	0	0
IPI00002895	SUPT4H1	Transcription elongation factor SPT4	6		4		3.37341	1															Nucleus	0	0.154
IPI00002910	TMEM149	Hypothetical protein FLJ22573																		4		6.75141	Plasma Membrane	1	1
IPI00002922	TBL1XR1	F-box-like/WD-repeat protein TBL1XR1	53	6	3	0.377174	0.3326			1		3.67117	4					25	15	18	1.46829	1.0339	Plasma Membrane	0	0
IPI00002926	VPS37B	Hypothetical protein FLJ12750	5					3					7										Nucleus	0	0.017
IPI00002938	ABT1	Basal transcriptional activator hABT1	4																				Nucleus	0	0
IPI00002966	HSPA4	Heat shock 70 kDa protein 4	235	31	7	0.428241	0.171925	126	21	17	0.830733	0.365432	150	7	16	0.350845	0.274117	49	22		1.11048		Cytoplasm	0	0.111	Yes
IPI00002968	MOCS2	Molybdenum cofactor synthesis protein 2 small subunit	1																				Cytoplasm	0	0.014
IPI00003004	SLC25A22	Mitochondrial glutamate carrier 1											1										Plasma Membrane	1	0.051
IPI00003016	STRN4	Striatin-4	1															1					Extracellular Space	0	0.962
IPI00003021	ATP1A2	Sodium/potassium-transporting ATPase alpha-2 chain precursor							1		5.97634												Plasma Membrane	8	0	Yes
IPI00003031	ISOC2	Hypothetical protein FLJ23469	14	4		0.92744		17					1					12		1		0.187527	Unknown	0	0.063	Yes
IPI00003057	MICALL2	MICAL-like 2 isoform 2	1																				Cytoplasm	0	0.103	Yes
IPI00003084	DRAP1	DR1-associated protein 1	2										3										Nucleus	0	0
IPI00003128	P4HA2	Splice Isoform IIb of Prolyl 4-hydroxylase alpha-2 subunit precursor	17	6		1.13152		10										3					Extracellular Space	0	1
IPI00003168	PRPSAP2	Phosphoribosyl pyrophosphate synthetase-associated protein 2	2	2		2.48527																	Unknown	0	0.001
IPI00003169	CHMP1A	Similar to PRSM1											3										Extracellular Space	0	0.016
IPI00003176	HTRA1	Serine protease HTRA1 precursor						1	14	5	35.3344	7.17792			1		3.52448						Extracellular Space	0	1	Yes
IPI00003217	PSMB7	Proteasome subunit beta type 7 precursor	23	1		0.176162		2					9										Cytoplasm	0	0.014
IPI00003269	DKFZp686D0972	HypotHetical protein LOC345651	114	63	43	1.77702	2.1226	166	36	63	1.07873	1.01367	159					292	109	68	0.925401	0.337113	Unknown	0	0	Yes
IPI00003309	POLR2H	DNA-directed RNA polymerases I, II, and III 17.1 kDa polypeptide	17	6		1.13152		3					5		3		1.42891						Nucleus	0	0
IPI00003311	POLR2L	DNA-directed RNA polymerase II 7.6 kDa polypeptide	6																				Nucleus	0	0.002
IPI00003326	SNX15	ADP-ribosylation factor-like protein 2											2										Unknown	0	0.001
IPI00003327	ARL3	ADP-ribosylation factor-like protein 3	27					6					9					2					Unknown	0	0.001
IPI00003348	GNB2	Guanine nucleotide-binding protein G(I)/G(S)/G(T) beta subunit 2	68	10		0.482304		14					23		6		0.672787	27	30	52	2.69111	2.70601	Plasma Membrane	0	0
IPI00003351	ECM1	Extracellular matrix protein 1 precursor		1		4.2279			29	1	145.314	3.67117		11	15	82.6791	38.8672	1	5		6.69593		Plasma Membrane	1	0.999	Yes
IPI00003352	BAK1	Bcl-2 homologous antagonist/killer		1		4.2279		1		2		3.17117						2		8		4.16761	Plasma Membrane	1	0
IPI00003362	HSPA5	78 kDa glucose-regulated protein precursor	364	114	93	1.01091	1.44321	168	40	43	1.18375	0.685564	253		77		0.769233	329	61	143	0.461154	0.6261	Extracellular Space	0	1	Yes
IPI00003373	OCLN	Occludin	4	1	4	0.84558	4.72277	4		4		2.33694								16		24.0057	Plasma Membrane	5	0
IPI00003377	SFRS7	Splice Isoform 1 of Splicing factor, arginine/serine-rich 7		5	3	17.1395	17.9604	6	2	3	1.56467	1.28764	8	5		4.23632				11		16.8164	Nucleus	0	0
IPI00003384	CELSR1	Splice Isoform 1 of Cadherin EGF LAG seven-pass G-type receptor 1 precursor																	1	1	3.47837	2.43785	Plasma Membrane	7	1	Yes
IPI00003394	SMN1	Splice Isoform SMN of Survival motor neuron protein											1	1		4.21269							Unknown	0	0
IPI00003400	CD37	Leukocyte antigen CD37																		2		3.87571	Plasma Membrane	4	0.008
IPI00003406	DBN1	Drebrin	7	7	1	2.94941	0.831682	5	4		3.48423		21	2	6	0.720488	0.733949	13	1	2	0.248455	0.276836	Cytoplasm	0	0.001
IPI00003411	PTGIS	Prostacyclin synthase	3															7	3	39	1.05439	7.13454	Plasma Membrane	1	0.999
IPI00003419	C11orf58	Small acidic protein		6		20.3674		11	2		0.912723		47	1		0.175529		26	13		1.23033		Unknown	0	0
IPI00003420	MAPRE2	Splice Isoform 1 of Microtubule-associated protein RP/EB family member 2											2										Cytoplasm	0	0
IPI00003428	NRF1	Splice Isoform Long of Nuclear respiratory factor 1																3					Nucleus	0	0
IPI00003438	DNAJC8	DnaJ (Hsp40) homolog, subfamily C, member 8	14	2		0.497053		16	2		0.644275		9	1		0.842537		5					Nucleus	0	0.018
IPI00003441	C1orf9	Hypothetical protein ORF9 precursor											1										Plasma Membrane	1	0.971
IPI00003442	HIF1A	Hypoxia-inducible factor 1 alpha																		1		2.43785	Nucleus	0	0
IPI00003443	IFI16	Splice Isoform 1 of Gamma-interferon-inducible protein Ifi-16	1					2					10	1	13	0.765943	3.07439	15					Nucleus	0	0	Yes
IPI00003455	TMEM48	Hypothetical protein		1		4.2279									3		8.57344						Plasma Membrane	6	0.061
IPI00003479	MAPK1	Mitogen-activated protein kinase 1	33	21		2.02311		15	3		0.995563		11										Cytoplasm	0	0.115	Yes
IPI00003482	DECR1	2,4-dienoyl-CoA reductase, mitochondrial precursor	14	3		0.712247		9					9		1		0.352448	13	5	16	0.956562	1.71469	Cytoplasm	0	0.308
IPI00003505	TRIP13	HPV16 E1 protein binding protein	2					1															Cytoplasm	0	0
IPI00003515	TRIP11	Thyroid receptor-interacting protein 11	13					18					3					2					Cytoplasm	0	0.917	Yes
IPI00003519	EFTUD2	116 kDa U5 small nuclear ribonucleoprotein component	39	4	4	0.34779	0.590346	20		15		1.9556	12		7		1.43626	29	18	36	1.52036	1.75876	Nucleus	0	0
IPI00003527	SLC9A3R1	Ezrin-radixin-moesin binding phosphoprotein 50	31	4	1	0.434737	0.207921	9	4		2.09054		4					4	4	4	2.1827	1.35028	Plasma Membrane	0	0.008
IPI00003562	CRSP9	Cofactor required for Sp1 transcriptional activation subunit 9	1										1										Nucleus	0	0
IPI00003564	LY86	Lymphocyte antigen 86 precursor																1					Extracellular Space	0	0.999
IPI00003565	PSMD10	26S proteasome non-ATPase regulatory subunit 10	12					4					4										Cytoplasm	0	0.066
IPI00003566	HOMER1	Splice Isoform 1 of Homer protein homolog 1	3																				Plasma Membrane	0	0	Yes
IPI00003588	EEF1E1	Eukaryotic translation elongation factor 1 epsilon-1	10		1		0.60486	4		5		2.87117	4		1		0.704896						Cytoplasm	0	0.117
IPI00003590	QSOX1	Quiescin Q6, isoform a	1	78	4	126.388	11.8069		18	5	90.5741	14.3558	1	152	115	564.828	145.658		5		13.3919		Plasma Membrane	1	1	Yes
IPI00003627	ACTL6A	Splice Isoform 1 of Actin-like protein 6A	9	4	1	1.39116	0.665346	11		3		0.751126	5					13	3		0.602508		Nucleus	0	0.001
IPI00003635	ERGIC1	Splice Isoform 2 of ER-Golgi intermediate compartment 32 kDa protein	11	3		0.890308		8					5		3		1.42891	7	2	6	0.744593	1.20339	Plasma Membrane	1	0	Yes
IPI00003704	RBM4	RNA binding motif protein 4	4					3					7					7		2		0.484463	Nucleus	0	0	Yes
IPI00003706	RBMS2	RNA-binding motif, single-stranded interacting protein 2						3										2					Nucleus	0	0	Yes
IPI00003734	LOC347701	Putative S100 calcium-binding protein H_NH0456N16.1																	1	11	3.47837	16.8164	Unknown	0	0.006	Yes
IPI00003766	ETHE1	ETHE1 protein, mitochondrial precursor	6					10					2					3					Cytoplasm	0	0.037
IPI00003768	PES1	Splice Isoform 1 of Pescadillo homolog 1											9		4		1.10979	2					Nucleus	0	0
IPI00003783	MAP2K2	Dual specificity mitogen-activated protein kinase kinase 2	4					8					12										Cytoplasm	0	0.816
IPI00003799	HEBP2	C6ORF34B	9										3					1					Cytoplasm	0	0
IPI00003802	MAN2A1	Alpha-mannosidase II							1	5	5.97634	14.3558			2		6.04896	6		2		0.553672	Plasma Membrane	1	0.055
IPI00003807	ACP2	Lysosomal acid phosphatase precursor																4	2	3	1.19135	1.06271	Plasma Membrane	1	0.999
IPI00003814	MAP2K6	Splice Isoform 1 of Dual specificity mitogen-activated protein kinase kinase 6	3																				Cytoplasm	0	0
IPI00003815	ARHGDIA	Rho GDP-dissociation inhibitor 1	77	16	5	0.674954	0.375222	29	12		2.02387		41	6	5	1.08458	0.324343	15	11		1.76638		Cytoplasm	0	0	Yes
IPI00003817	ARHGDIB	Rho GDP-dissociation inhibitor 2	22	12		1.7276		5					25	3	7	0.895235	0.71813	17	26		3.63543		Cytoplasm	0	0
IPI00003818	KYNU	Kynureninase																2					Cytoplasm	0	0
IPI00003824	PPIL2	Splice Isoform 1 of Peptidyl-prolyl cis-trans isomerase-like 2						1										1					Nucleus	0	0
IPI00003833	MTCH2	Mitochondrial carrier homolog 2	27	15	7	1.76495	1.44908	23		2		0.264264	9		2		0.604896	12	5	18	1.03014	2.0678	Cytoplasm	0	0.468
IPI00003834	FJX1	Putative secreted ligand												12		90.1045							Plasma Membrane	1	0.976
IPI00003842	MAP2	Splice Isoform 1 of Microtubule-associated protein 2						1							1		3.52448	1	2		2.97837		Cytoplasm	0	0.001	Yes
IPI00003843	TJP2	Splice Isoform A1 of Tight junction protein ZO-2	38	5		0.439474		4					11					1					Plasma Membrane	0	0	Yes
IPI00003848	DNAJB4	DnaJ homolog subfamily B member 4	5					5															Unknown	0	0
IPI00003856	ATP6V1E1	Vacuolar ATP synthase subunit E	5					8	1	2	0.664038	0.704704	4					4					Cytoplasm	0	0
IPI00003865	HSPA8	Splice Isoform 1 of Heat shock cognate 71 kDa protein	580	158	112	0.879532	1.09154	469	70	81	0.743284	0.462478	451	23	160	0.380052	0.895834	199	117	105	1.45485	0.759873	Cytoplasm	0	0.004	Yes
IPI00003870	CLPP	Putative ATP-dependent Clp protease proteolytic subunit, mitochondrial precursor	3										3					3					Cytoplasm	0	0.252
IPI00003881	HNRPF	Heterogeneous nuclear ribonucleoprotein F	94	19	2	0.656106	0.129547	55	1	41	0.10672	1.97353	80	6	41	0.562373	1.29017	63	17	31	0.673943	0.712085	Nucleus	0	0
IPI00003882	LIPC	Hepatic triacylglycerol lipase precursor	1																				Extracellular Space	0	0.995
IPI00003899	REPIN1	AP4 protein	4					2					2										Unknown	0	0.001
IPI00003907	PCDHGA12	Splice Isoform 1 of Protocadherin gamma C5 precursor											1										Plasma Membrane	1	0.995	Yes
IPI00003909	SLC2A3	Solute carrier family 2, facilitated glucose transporter member 3						4		3		1.8027	2							6		9.62712	Plasma Membrane	10	0.743
IPI00003918	RPL4	60S ribosomal protein L4	74	11		0.486759		62		6		0.27027	50	4	16	0.60199	0.811602	18	1	3	0.183072	0.279661	Cytoplasm	0	0
IPI00003919	QPCT	Glutaminyl-peptide cyclotransferase precursor							21	2	105.503	6.34234		1		8.42537							Extracellular Space	0	0.997	Yes
IPI00003923	UMPS	Splice Isoform 1 of Uridine 5'-monophosphate synthase	54	10	10	0.605073	1.04608	10		1		0.333743	4										Cytoplasm	0	0.845
IPI00003925	PDHB	Splice Isoform 1 of Pyruvate dehydrogenase E1 component beta subunit, mitochondrial precursor	28	2		0.257097		32		1		0.111248	11	2		1.3209		19	4	4	0.545675	0.337571	Cytoplasm	0	0.028
IPI00003927	PPID	40 kDa peptidyl-prolyl cis-trans isomerase	19	1		0.211395							12										Cytoplasm	0	0
IPI00003933	HAGH	Hydroxyacyl glutatHione Hydrolase; Hydroxyacyl glutatHione Hydrolase; glyoxalase II; Hydroxyacyl glutatHione Hydrolase; glyoxalase 2; HydroxyacylglutatHione Hydroxylase	14	5		1.14263		1					2						2		5.95675		Cytoplasm	0	0.893	Yes
IPI00003935	HIST2H2BE	Histone H2B.q			48		272.366	134	1	47	0.0442692	0.93737			31		79.2589	104	24	32	0.576009	0.447727	Nucleus	0	0	Yes
IPI00003944	DBT	Lipoamide acyltransferase component of branched-chain alpha-keto acid dehydrogenase complex, mitochondrial precursor			1		6.65346																Cytoplasm	0	0.003
IPI00003949	UBE2N	Ubiquitin-conjugating enzyme E2 N	20	10	3	1.58471	0.855256	7	2		1.36908		7	2		1.98134		1	2		2.97837		Cytoplasm	0	0	Yes
IPI00003951	LAMA3	Similar to Laminin alpha-3 chain precursor		6		20.3674			7		35.8344				1		3.52448						Extracellular Space	0	0.997
IPI00003964	USP9X	Splice Isoform Short of Probable ubiquitin carboxyl-terminal hydrolase FAF-X								1		3.67117	1		2		3.02448						Plasma Membrane	0	0	Yes
IPI00003965	USP7	Ubiquitin carboxyl-terminal hydrolase 7	1	1		2.11395												4					Nucleus	0	0	Yes
IPI00003968	NDUFA9	NADH-ubiquinone oxidoreductase 39 kDa subunit, mitochondrial precursor	2					1		2		3.17117	3					5					Cytoplasm	0	0.783
IPI00003970	ME3	NADP-dependent malic enzyme, mitochondrial precursor																1					Cytoplasm	0	0.486
IPI00003971	RTN1	Splice Isoform RTN1-A of Reticulon-1						3					2		1		1.17483	11	1	13	0.289864	1.64101	Plasma Membrane	2	0	Yes
IPI00003985	BCS1L	Mitochondrial chaperone BCS1																1					Cytoplasm	0	0.097
IPI00003990	BPHL	Splice Isoform 2 of Valacyclovir hydrolase precursor																1					Cytoplasm	0	0.826
IPI00004045	RBPMS	Splice Isoform A of RNA-binding protein with multiple splicing	1		4		11.8069																Unknown	0	0
IPI00004047	EXT2	Splice Isoform 1 of Exostosin-2												4	8	30.7015	21.1959						Plasma Membrane	1	0.012	Yes
IPI00004069	TATDN2	TatD DNase domain containing deoxyribonuclease 2											2										Nucleus	0	0	Yes
IPI00004084	CREBL1	Splice Isoform 2 of Cyclic AMP-dependent transcription factor ATF-6 beta		7		23.5953			1		5.97634			3		23.2761							Cytoplasm	0	0.001
IPI00004092	ATP2A3	Splice Isoform SERCA3B of Sarcoplasmic/endoplasmic reticulum calcium ATPase 3																1	7	48	9.1743	35.0085	Plasma Membrane	7	0.038
IPI00004101	BHMT	Betaine--homocysteine S-methyltransferase		1		4.2279			1		5.97634												Cytoplasm	0	0
IPI00004114	RNASE6	Ribonuclease K6 precursor																2					Plasma Membrane	1	1	Yes
IPI00004233	MKI67	Splice Isoform Long of Antigen KI-67		1		4.2279		7		1		0.458896	9					14		1		0.162524	Nucleus	0	0.349	Yes
IPI00004267	OPRS1	Sigma 1 receptor beta variant		1		4.2279							1							2		3.87571	Plasma Membrane	1	0.981
IPI00004273	RBM25	Probable RNA-binding protein 25	12					8		1		0.407908	7					3	2	4	1.48919	1.68785	Nucleus	0	0.001
IPI00004288	SIGLEC7	Splice Isoform 1 of Sialic acid-binding Ig-like lectin 7 precursor																		8		12.5028	Plasma Membrane	1	0.995
IPI00004310	LYPD3	GPI-anchored metastasis-associated protein homolog							3	1	15.929	3.67117							3		8.43512		Extracellular Space	0	0.999
IPI00004312	STAT2	Splice Isoform Long of Signal transducer and activator of transcription 2						1		3		4.50675								2		3.87571	Nucleus	0	0
IPI00004315	SIGLEC9	Sialic acid-binding Ig-like lectin 9 precursor																2		12		6.08475	Plasma Membrane	1	0.976
IPI00004317	POLG	DNA polymerase gamma subunit 1																		1		2.43785	Cytoplasm	0	0.188	Yes
IPI00004324	TRAPPC3	Trafficking protein particle complex subunit 3	7					3					4							3		5.31356	Cytoplasm	0	0.015
IPI00004337	ZBTB11	Zinc finger and BTB domain-containing protein 11	1																				Nucleus	0	0	Yes
IPI00004344	AFF4	AF5q31 protein																2					Nucleus	0	0
IPI00004350	GTF2A1	Transcription initiation factor IIA subunit 1											1										Cytoplasm	0	0
IPI00004353	GTF2A2	Transcription initiation factor IIA gamma chain	1																				Nucleus	0	0
IPI00004358	PYGB	Glycogen phosphorylase, brain form	12	9	2	2.31162	0.946686	16	4	20	1.22973	3.20138	20		1		0.167832	4	4	7	2.1827	2.213	Unknown	0	0	Yes
IPI00004363	STK39	STE20/SPS1-related proline-alanine-rich protein kinase											6										Extracellular Space	0	0.958
IPI00004392	NUDT1	7,8-dihydro-8-oxoguanine triphosphatase	1										1										Unknown	0	0
IPI00004397	RALB	Ras-related protein Ral-B	1	1		2.11395		2															Cytoplasm	0	0.03
IPI00004398	SERP1	SERP1											2										Plasma Membrane	1	0.007
IPI00004399	ERRFI1	Mitogen-inducible gene 6 protein											4										Cytoplasm	0	0
IPI00004407	SIT1	SIT protein precursor																1		4		3.37571	Plasma Membrane	1	0.078
IPI00004408	ADD3	Splice Isoform 2 of Gamma-adducin						1															Cytoplasm	0	0
IPI00004409	DDR2	Discoidin domain receptor 2 precursor													2		6.04896						Plasma Membrane	1	1	Yes
IPI00004416	CHMP2A	Charged multivesicular body protein 2a	1					2					1										Cytoplasm	0	0
IPI00004436	LSM1	U6 snRNA-associated Sm-like protein LSm1	1					1						1		8.42537							Nucleus	0	0
IPI00004450	RBMXL2	Testes specific heterogenous nuclear ribonucleoprotein G-T								1		3.67117											Unknown	0	0
IPI00004454	DPM3	Dolichyl-phosphate mannosyltransferase polypeptide 3, isoform 1	5	1		0.70465							3		4		2.77448						Plasma Membrane	3	0.939
IPI00004472	WNK1	Splice Isoform 1 of Serine/threonine-protein kinase WNK1	6					2					2										Cytoplasm	0	0.017	Yes
IPI00004477	RCP9	Splice Isoform 1 of Calcitonin gene-related peptide-receptor component protein	2					1															Plasma Membrane	0	0
IPI00004480	ADAMDEC1	ADAM DEC1 precursor																	2		5.95675		Extracellular Space	0	0.986	Yes
IPI00004488	ATP6V1F	Vacuolar ATP synthase subunit F	5		1		1.10891	4					2					4					Cytoplasm	0	0.001
IPI00004503	LAMP1	Lysosome-associated membrane glycoprotein 1 precursor	12	2	1	0.573523	0.511805	8	1	9	0.664038	2.78228	4		4		2.21959	4	3	5	1.68702	1.63785	Plasma Membrane	2	1	Yes
IPI00004504	CXorf9	SH3 protein expressed in lymphocytes homolog																3					Unknown	0	0
IPI00004506	KCTD5	Potassium channel tetramerisation domain containing protein 5	1																				Unknown	0	0.023
IPI00004523	ZFAND6	Hypothetical protein						1					8										Unknown	0	0.002
IPI00004524	GCA	Grancalcin	5	2		1.24263												5					Cytoplasm	0	0.001
IPI00004533	KIF3B	Kinesin-like protein KIF3B	4					4															Cytoplasm	0	0	Yes
IPI00004534	PFAS	Phosphoribosylformylglycinamidine synthase	3										46	5	9	0.81121	0.504688	1					Cytoplasm	0	0.002	Yes
IPI00004550	KRT24	Hypothetical protein FLJ20261																		9		13.9407	Unknown	0	0.311	Yes
IPI00004655	FRG1	FRG1 protein											2										Nucleus	0	0
IPI00004656	B2M	Beta-2-microglobulin precursor	11	57	1	15.4159	0.554455	25	65	11	12.4793	1.16857	2	25	12	62.2114	10.4313	10	23		5.27296		Extracellular Space	0	1	Yes
IPI00004657	HLA-A	HLA class I histocompatibility antigen, B-7 alpha chain precursor	29	16	13	1.75488	2.48317	165	48	153	1.44497	2.46801	42		66		3.89804	217	66	134	0.75492	0.888405	Plasma Membrane	1	1
IPI00004668	FUT8	Splice Isoform 1 of Alpha-(1,6)-fucosyltransferase																1		1		1.21893	Plasma Membrane	1	0.533
IPI00004669	GALNT2	Polypeptide N-acetylgalactosaminyltransferase 2	14	18		3.94015		14	9	7	3.05247	1.31321	2	1	4	2.80846	3.69931	2	4	1	3.63783	0.812618	Plasma Membrane	1	0.734	Yes
IPI00004670	GALNT3	Splice Isoform 1 of Polypeptide N-acetylgalactosaminyltransferase 3	13	4	1	0.993686	0.475247											4					Plasma Membrane	1	0.008
IPI00004671	GOLGB1	Golgin subfamily B member 1	42					15					2					11					Plasma Membrane	1	0.673	Yes
IPI00004795	CLNS1A	Methylosome subunit pICln	68	9	2	0.435523	0.178361	4					1										Plasma Membrane	0	0
IPI00004798	CRISP3	Cysteine-rich secretory protein-3 precursor																1	2		2.97837		Extracellular Space	0	0.999	Yes
IPI00004808	AKAP9	Similar to A-kinase anchor protein 9								1		3.67117											Cytoplasm	0	0.004
IPI00004838	CRK	Splice Isoform Crk-II of Proto-oncogene C-crk	16	5		1.00821		10	3		1.44809							4	2		1.19135		Cytoplasm	0	0
IPI00004839	CRKL	Crk-like protein	25	5	6	0.659211	1.34311	27	4	2	0.74662	0.226512	9					7	2		0.744593		Cytoplasm	0	0
IPI00004845	NIPSNAP3A	Protein NipSnap3A	12	1		0.325223		2					2					12	2		0.458211		Cytoplasm	0	0.656
IPI00004860	RARS	Arginyl-tRNA synthetase	28	6	1	0.702324	0.22943	12		17		3.56999	41	1	13	0.200604	0.805197	1					Cytoplasm	0	0.001
IPI00004902	ETFB	Electron transfer flavoprotein beta-subunit	9					17					9					14	1		0.231892		Cytoplasm	0	0
IPI00004924	DEF6	IRF4-binding protein																	1		3.47837		Extracellular Space	0	0.007
IPI00004928	EGLN1	Splice Isoform 1 of Egl nine homolog 1	10					4					3										Cytoplasm	0	0	Yes
IPI00004946	CXCL16	Small inducible cytokine B16		7		23.5953			2		10.9527								6		15.8702		Plasma Membrane	1	0.183
IPI00004948	GPSM1	Hypothetical protein DKFZp727I051											1		5		6.8112						Cytoplasm	0	0.031
IPI00004962	GOLIM4	130 kD Golgi-localized phosphoprotein	4					3	3		3.98225		4	2		3.17015		4					Plasma Membrane	1	0.259
IPI00004968	PRPF19	PRP19/PSO4 homolog	38	9		0.770541		19		2		0.317117	25		4		0.426843	37	16	40	1.06984	1.53985	Nucleus	0	0
IPI00004970	UTP20	Down-regulated in metastasis protein																1					Nucleus	0	0
IPI00005011	CNOT2	Splice Isoform 1 of CCR4-NOT transcription complex subunit 2						2															Nucleus	0	0
IPI00005024	MYBBP1A	Splice Isoform 1 of Myb-binding protein 1A						2					2		3		2.85781			2		3.87571	Nucleus	0	0	Yes
IPI00005036	RBM5	RNA-binding protein 5																2		2		1.2919	Nucleus	0	0
IPI00005038	HRSP12	Ribonuclease UK114	6	1		0.603986		3					3										Cytoplasm	0	0.01	Yes
IPI00005040	ACADM	Acyl-CoA dehydrogenase, medium-chain specific, mitochondrial precursor	5	2		1.24263		4					4					9	1		0.347837		Cytoplasm	0	0
IPI00005042	FLJ20273	Hypothetical protein FLJ20273	5					2					2					1					Unknown	0	0.004	Yes
IPI00005045	ABCF2	ATP-binding cassette sub-family F member 2	1					5					19										Cytoplasm	0	0
IPI00005050	MRPS14	Mitochondrial 28S ribosomal protein S14			1		6.65346	2					2					1					Cytoplasm	0	0.373
IPI00005055	CXorf56	Hypothetical protein FLJ22965											1										Unknown	0	0
IPI00005068	SLC44A1	Splice Isoform 2 of Choline transporter-like protein 1								2		6.34234			1		3.52448			7		11.065	Plasma Membrane	9	0.002
IPI00005087	TMOD3	Tropomodulin-3	22		1		0.289281	26		12		1.22422	8	3	2	2.58624	0.672107	11		2		0.322976	Cytoplasm	0	0	Yes
IPI00005102	SMS	Spermine synthase	9	2	2	0.74558	1.23069	21	1	2	0.271652	0.288288	6		2		0.864138						Unknown	0	0.064
IPI00005107	NPC1	Niemann-Pick C1 protein precursor								5		14.3558			1		3.52448	2		2		1.2919	Plasma Membrane	12	1
IPI00005118	HK3	Hexokinase-3																	2	3	5.95675	5.31356	Cytoplasm	0	0	Yes
IPI00005126	EFNB2	Ephrin-B2 precursor		11		36.5069									2		6.04896		3	8	8.43512	12.5028	Plasma Membrane	1	0.901	Yes
IPI00005129	SCAMP1	Splice Isoform 1 of Secretory carrier-associated membrane protein 1	8	6		2.26304							4		7		3.73427	1		15		11.2839	Plasma Membrane	4	0
IPI00005132	GNL3L	Hypothetical protein FLJ10613			1		6.65346																Unknown	0	0
IPI00005142	FGFR1	Splice Isoform 1 of Basic fibroblast growth factor receptor 1 precursor		6		20.3674								2		15.8507							Plasma Membrane	1	1	Yes
IPI00005154	SSRP1	Structure-specific recognition protein 1	5					12		2		0.487872	5		2		1.00816	1					Nucleus	0	0
IPI00005158	LONP1	Lon protease homolog, mitochondrial precursor	24	1		0.169116		25					22		1		0.153238			3		5.31356	Extracellular Space	0	0.953	Yes
IPI00005159	ACTR2	Actin-like protein 2	65	13	11	0.65095	0.957395	23	2	11	0.456361	1.26595	22	1	4	0.366321	0.482519	29	20	36	1.68558	1.75876	Plasma Membrane	0	0	Yes
IPI00005160	ARPC1B	Actin-related protein 2/3 complex subunit 1B	48	17	2	1.14029	0.251162	20					21		5		0.6192	36	12	11	0.830824	0.454497	Cytoplasm	0	0.002	Yes
IPI00005162	ARPC3	Actin-related protein 2/3 complex subunit 3	15	1	3	0.264244	1.12252	4		2		1.26847	10										Cytoplasm	0	0.001	Yes
IPI00005171	HLA-DRA	HLA class II histocompatibility antigen, DR alpha chain precursor								4		11.6847						54	10	32	0.468795	0.854751	Plasma Membrane	1	0.996
IPI00005179	POLR1C	Splice Isoform 1 of DNA-directed RNA polymerase I 40 kDa polypeptide	4					1					1					1					Nucleus	0	0.004
IPI00005180	HLA-DRB5	HLA class II histocompatibility antigen, DRB1-8 beta chain precursor						11		6		1.41892						47	14	26	0.743692	0.799671	Plasma Membrane	2	0.995
IPI00005181	PLSCR1	Phospholipid scramblase 1		2		7.4558		1		1		1.83558			1		3.52448		2	1	5.95675	2.43785	Plasma Membrane	0	0	Yes
IPI00005186	HLA-DQB1	HLA class II histocompatibility antigen, DQ(1) beta chain precursor																17		9		0.774482	Plasma Membrane	1	0.997
IPI00005194	UBFD1	Gene product with similarity to Ubiquitin binding enzyme	10					4					2										Unknown	0	0
IPI00005198	ILF2	Interleukin enhancer-binding factor 2	49	8	6	0.536464	0.698415	30	2	10	0.353312	0.893926	21	2	11	0.720488	1.3077	16	10	54	1.51669	4.62612	Nucleus	0	0.001	Yes
IPI00005202	PGRMC2	Membrane associated progesterone receptor component 2	28		9		1.789	17					2					8	2	9	0.661861	1.54896	Plasma Membrane	1	0	Yes
IPI00005240	NFATC3	Splice Isoform 2 of Nuclear factor of activated T-cells, cytoplasmic 3							1		5.97634												Nucleus	0	0
IPI00005264	PKP2	Splice Isoform 2 of Plakophilin-2						1		1		1.83558											Plasma Membrane	0	0.016
IPI00005277	RAD9A	RAD9A protein																1					Nucleus	0	0.005
IPI00005292	SPOCK1	Testican-1 precursor							65	15	324.462	41.0675											Extracellular Space	0	0.999	Yes
IPI00005367	PRKAG2	Splice Isoform A of 5'-AMP-activated protein kinase, gamma-2 subunit											1										Unknown	0	0	Yes
IPI00005416	UBAP2L	NICE-4 protein	40	10	5	0.811683	0.713837	24		2		0.253694	32	1	4	0.255314	0.336301	8		5		0.909919	Unknown	0	0.02	Yes
IPI00005467	PRSS22	Brain-specific serine protease 4 precursor																	7		18.3486		Extracellular Space	0	0.989	Yes
IPI00005474	LHPP	Phospholysine phosphohistidine inorganic pyrophosphate phosphatase	4	5		3.4279		7											2		5.95675		Unknown	0	0.317	Yes
IPI00005490	GOLPH3	Golgi phosphoprotein 3	4					5		1		0.611862	1										Cytoplasm	0	0
IPI00005491	CLSTN2	Calsyntenin-2 precursor		1		4.2279																	Plasma Membrane	1	0.999
IPI00005492	WDR5	WD-repeat protein 5	1															2		2		1.2919	Nucleus	0	0
IPI00005502	ATN1	Atrophin-1											2										Nucleus	0	0	Yes
IPI00005511	PHF5A	PHD finger-like domain protein 5A											16					6					Nucleus	0	0.001
IPI00005517	EFNA5	Ephrin-A5 precursor		15		49.4185																	Extracellular Space	0	0.988	Yes
IPI00005537	MRPL12	39S ribosomal protein L12, mitochondrial precursor	18		4		1.24283	14					8	1		0.936153		9					Cytoplasm	0	0.861
IPI00005563	TINAGL1	Splice Isoform 1 of Tubulointerstitial nephritis antigen-like precursor							2		10.9527												Extracellular Space	0	1
IPI00005564	STC1	Stanniocalcin-1 precursor							4		20.9054			5	1	38.1269	3.52448						Extracellular Space	0	0.997
IPI00005573	NT5C	Splice Isoform 1 of 5'(3')-deoxyribonucleotidase, cytosolic type	15					5					4					1					Cytoplasm	0	0.012
IPI00005578	EHD4	EH-domain containing protein 4	4					6					22		4		0.482519	4	2		1.19135		Plasma Membrane	0	0.002
IPI00005585	TAX1BP3	Similar to Tax interaction protein 1	3					3	1		1.49408		4					2	2		1.98558		Nucleus	0	0
IPI00005589	hCG_18290	16 kDa protein	3					11		9		2.08671						6	1		0.49691		Unknown	0	0	Yes
IPI00005605	NDRG3	Splice Isoform 1 of NDRG3 protein	11	2		0.621317		6					1						2		5.95675		Unknown	0	0	Yes
IPI00005613	U2AF1	Splicing factor U2AF 35 kDa subunit	9					1					6					2					Nucleus	0	0
IPI00005614	SPTBN1	Splice Isoform Long of Spectrin beta chain, brain 1	23	23		3.13507		201	40	26	0.990364	0.348764	16	1	1	0.49561	0.207322	46	15	94	0.812247	2.89698	Plasma Membrane	0	0	Yes
IPI00005615	TIAL1	Nucleolysin TIAR	18	2		0.39241		6												5		8.18927	Nucleus	0	0
IPI00005634	KIAA0372	Hypothetical protein KIAA0372								1		3.67117	1										Unknown	0	0
IPI00005648	SAFB2	Scaffold attachment factor B2							2		10.9527		15	6		2.84701		19	6	4	0.793512	0.337571	Unknown	0	0.001
IPI00005657	PFDN6	Prefoldin subunit 6	5					3					7					2					Cytoplasm	0	0	Yes
IPI00005658	UBL4A	Ubiquitin-like protein 4	5					1					3										Unknown	0	0.001
IPI00005667	N4BP1	Nedd4 binding protein 1	1										1										Cytoplasm	0	0.068	Yes
IPI00005668	AKR1C2	Aldo-keto reductase family 1 member C2								2		6.34234			4		11.0979						Cytoplasm	0	0.001	Yes
IPI00005675	NKRF	NF-kappa-B-repressing factor													1		3.52448						Nucleus	0	0
IPI00005681	LOC151579	Similar to basic leucine zipper and W2 domains 1; basic leucine-zipper protein BZAP45	3																				Unknown	0	0.001
IPI00005688	ZNF185	Zinc finger protein 185	8	2		0.828422		4		1		0.734234	29	1		0.280846		5	2	3	0.992791	0.885593	Nucleus	0	0	Yes
IPI00005692	MRPS12	28S ribosomal protein S12, mitochondrial precursor											6		2		0.864138						Cytoplasm	0	0.818
IPI00005705	PPP1CC	Splice Isoform Gamma-1 of Serine/threonine protein phosphatase PP1-gamma catalytic subunit							3	11	15.929	30.3829	29		4		0.369931		8	7	20.827	11.065	Cytoplasm	0	0
IPI00005707	MRC2	Urokinase receptor-associated protein uPARAP		1		4.2279		1		3		4.50675											Plasma Membrane	1	0.999	Yes
IPI00005711	HDAC6	Histone deacetylase 6	5					1															Nucleus	0	0
IPI00005715	UBE4B	Splice Isoform 1 of Ubiquitin conjugation factor E4 B	1																				Cytoplasm	0	0
IPI00005719	RAB1A	Splice Isoform 1 of Ras-related protein Rab-1A	50	15	22	0.96899	2.45836	30		25		2.18643	17	2	22	0.880597	3.14103	5	6	24	2.64504	5.91808	Cytoplasm	0	0.002	Yes
IPI00005721	DEFA1	Neutrophil defensin 1 precursor	2															34	7		0.524246		Extracellular Space	0	1	Yes
IPI00005724	LANCL1	LanC-like protein 1	13												1		3.52448						Plasma Membrane	0	0
IPI00005728	RER1	RER1 protein	4	2	1	1.49116	1.33069	3											3	19	8.43512	28.3192	Plasma Membrane	3	0
IPI00005733	TGFBR1	TGF-beta receptor type I precursor		1		4.2279																	Plasma Membrane	2	1
IPI00005734	LAMC3	Laminin gamma-3 chain precursor																	1		3.47837		Extracellular Space	0	1
IPI00005737	SURF4	Splice Isoform 1 of Surfeit locus protein 4								3		9.01351			5		13.6224		2	26	5.95675	38.3842	Plasma Membrane	5	0
IPI00005740	COX4NB	Neighbor of COX4	1										2					2					Unknown	0	0.001
IPI00005745	SPTLC1	Serine palmitoyltransferase 1	2							3		9.01351						9	1	5	0.347837	0.818927	Plasma Membrane	2	0.035
IPI00005751	SPTLC2	Serine palmitoyltransferase 2	1															5	2	1	0.992791	0.406309	Cytoplasm	0	0.002
IPI00005780	OGT	Splice Isoform 3 of UDP-N-acetylglucosamine--peptide N-acetylglucosaminyltransferase 110 kDa subunit	5										3					3					Cytoplasm	0	0
IPI00005791	NDC80	Retinoblastoma-associated protein HEC	2										5										Nucleus	0	0.012	Yes
IPI00005792	PABPN1	Poly(A) binding Protein, nuclear 1											5					2					Extracellular Space	0	0.994	Yes
IPI00005806	ST7	ST7 form 2 splice variant a											1		2		3.02448						Plasma Membrane	2	0.008
IPI00005809	SDPR	Serum deprivation response																	1		3.47837		Plasma Membrane	0	0
IPI00005811	MLH3	Splice Isoform 1 of DNA mismatch repair protein Mlh3	1																				Nucleus	0	0.009	Yes
IPI00005824	LIN7A	LIN-7 homolog A		1		4.2279		2															Cytoplasm	0	0.067
IPI00005826	HERC2	HERC2											1		1		1.76224						Cytoplasm	0	0.006
IPI00005858	LATS1	Splice Isoform 1 of Serine/threonine-protein kinase LATS1																1					Nucleus	0	0	Yes
IPI00005861	PRPF3	Splice Isoform 1 of U4/U6 small nuclear ribonucleoprotein Prp3	14					18					6					6					Nucleus	0	0
IPI00005908	ADAMTS1	ADAMTS-1 precursor		24		78.4696							15	56	46	26.0513	7.32038						Extracellular Space	0	0.947	Yes
IPI00005948	MGC3207	Hypothetical protein MGC3207						4															Cytoplasm	0	0.001
IPI00005966	NDUFA12	NADH-ubiquinone oxidoreductase subunit B17.2	1					5					2					5					Cytoplasm	0	0	Yes
IPI00005969	CAPZA1	F-actin capping protein alpha-1 subunit	29	11	10	1.2169	1.91782	12	5	4	1.9909	0.898821	47	2	4	0.330224	0.231207	20	3	6	0.401672	0.458434	Cytoplasm	0	0	Yes
IPI00005978	SFRS2	Splicing factor, arginine/serine-rich 2		3	1	10.6837	6.65346	3					15	2		0.990672			2	2	5.95675	3.87571	Nucleus	0	0
IPI00005979	EIF2B4	Splice Isoform 1 of Translation initiation factor eIF-2B delta subunit	1										3		2		1.51224						Cytoplasm	0	0.001
IPI00005981	TAGLN3	Transgelin-3											6										Unknown	0	0
IPI00005996	HMGA2	High mobility group protein HMGI-C											14		1		0.234965						Nucleus	0	0.001
IPI00006025	SART3	Hypothetical protein KIAA0156	7	2		0.931975		4					16					6					Nucleus	0	0
IPI00006029	FOXK2	Splice Isoform 1 of Forkhead box protein K2	5					3					3		2		1.51224	1					Nucleus	0	0.009
IPI00006034	CRIP2	Cysteine-rich protein 2	19	37	1	6.02161	0.332673	11	3	2	1.32742	0.528528	3					17	9	10	1.29474	0.854363	Unknown	0	0
IPI00006038	NUP98	Splice Isoform 1 of Nuclear pore complex protein Nup98-Nup96 precursor	3					3										2					Nucleus	0	0.034
IPI00006050	KIAA0738	Hypothetical protein KIAA0738													1		3.52448						Unknown	0	0.258
IPI00006052	PFDN2	Prefoldin subunit 2	15		2		0.769182	2					14										Cytoplasm	0	0
IPI00006056	GNL1	Guanine nucleotide-binding protein-like 1	8					3		1		0.917792	12	1		0.648106							Unknown	0	0.008
IPI00006065	TOX	Thymus high mobility group box protein TOX	1																				Nucleus	0	0	Yes
IPI00006071	CD38	Splice Isoform 1 of ADP-ribosyl cyclase 1																2		14		7.04332	Plasma Membrane	1	0.006
IPI00006077	PHF16	PHD finger protein 16						2															Unknown	0	0
IPI00006079	BCLAF1	Splice Isoform 1 of Bcl-2-associated transcription factor 1	11					16	5		1.52245		27	7		1.89206		5		1		0.406309	Nucleus	0	0
IPI00006092	PMM2	Phosphomannomutase 2	11					2					2										Cytoplasm	0	0.525
IPI00006097	LTBR	Tumor necrosis factor receptor superfamily member 3 precursor																		1		2.43785	Plasma Membrane	1	0.999
IPI00006103	CD2BP2	CD2 antigen cytoplasmic tail-binding protein 2								2		6.34234						2					Cytoplasm	0	0
IPI00006113	POLR2I	DNA-directed RNA polymerase II 14.5 kDa polypeptide											1					4					Nucleus	0	0
IPI00006114	SERPINF1	Pigment epithelium-derived factor precursor		2		7.4558			2	2	10.9527	6.34234		1	4	8.42537	11.0979	3					Extracellular Space	0	1	Yes
IPI00006122	CTAGE5	Splice Isoform MEA6 of Cutaneous T-cell lymphoma-associated antigen 5	12					1					5					13		15		1.61199	Plasma Membrane	1	0
IPI00006128	SPOCK2	Testican-2 precursor	14	165	20	35.5736	7.60461	25	251	53	48.0793	5.48354	18		5		0.716969		7		18.3486		Extracellular Space	0	1	Yes
IPI00006130	KIAA0494	Protein KIAA0494		2		7.4558																	Plasma Membrane	1	0.005
IPI00006146	SAA1	Serum amyloid A2							1		5.97634								2		5.95675		Extracellular Space	0	0.999	Yes
IPI00006153	BHLHB3	Class B basic helix-loop-helix protein 3	1																				Nucleus	0	0
IPI00006157	NSBP1	Nucleosomal binding protein 1						2					1										Nucleus	0	0.02
IPI00006164	ILKAP	Hypothetical protein DKFZp434J2031	8					5					1										Cytoplasm	0	0
IPI00006167	PPM1G	Protein phosphatase 2C gamma isoform	15	4	5	0.869475	1.82921	13					19		5		0.68112	9	1		0.347837		Nucleus	0	0
IPI00006173	CETP	Cholesteryl ester transfer protein precursor																		1		2.43785	Extracellular Space	0	0.999	Yes
IPI00006176	HGS	Hepatocyte growth factor-regulated tyrosine kinase substrate	10	1		0.384355		5					13										Cytoplasm	0	0
IPI00006181	EIF3S7	Eukaryotic translation initiation factor 3 subunit 7	17	2		0.414211		12					27		16		1.47828	5					Cytoplasm	0	0	Yes
IPI00006196	NUMA1	Splice Isoform 2 of Nuclear mitotic apparatus protein 1	36	14		1.24839		19	6	4	1.5429	0.584234	59	1	7	0.140423	0.31119	107	7	1	0.169895	0.0225727	Nucleus	0	0.897
IPI00006205	SLC33A1	Acetyl-coenzyme A transporter								2		6.34234								10		15.3785	Plasma Membrane	11	0
IPI00006207	LRRFIP1	TRIP protein	23	5		0.714146		22	2		0.476203		22	4		1.33485		21	6	3	0.721374	0.241525	Nucleus	0	0	Yes
IPI00006210	BIRC5	Splice Isoform Alpha of Baculoviral IAP repeat-containing protein 5	3																				Cytoplasm	0	0.001
IPI00006211	VAPB	VAMP (Vesicle-associated membrane protein)-associated protein B and C	41	2	18	0.177519	2.44672	13					8	4		3.41128		2		16		8.00189	Plasma Membrane	1	0	Yes
IPI00006213	PCM1	Pericentriol material 1																2					Cytoplasm	0	0	Yes
IPI00006236	PDGFRL	PDGF receptor beta-like tumor suppressor													1		3.52448						Extracellular Space	0	0.999
IPI00006246	TBRG4	Cell cycle progression 2 protein											1						1	1	3.47837	2.43785	Unknown	0	0
IPI00006252	SCYE1	Multisynthetase complex auxiliary component p43	26	14		1.71076		19	1	2	0.298817	0.317117	17	5		2.11816		8	3	2	0.937235	0.430634	Extracellular Space	0	0
IPI00006266	BCL7C	BCL7C protein			1		6.65346	1										4	1		0.695675		Unknown	0	0
IPI00006273	CYR61	CYR61 protein		24		78.4696			29		145.314		74	172	74	17.0422	2.50416	2	8		6.94233		Extracellular Space	0	0.007
IPI00006288	SLIT2	Splice Isoform 1 of Slit homolog 2 protein precursor		2		7.4558																	Extracellular Space	0	0.996	Yes
IPI00006296	SLC22A6	HOAT1-1											1										Plasma Membrane	9	0.357
IPI00006298	PPIG	Splice Isoform 1 of Peptidyl-prolyl cis-trans isomerase G											8										Nucleus	0	0
IPI00006362	EDF1	Splice Isoform 2 of Endothelial differentiation-related factor 1		3		10.6837		3					6	2		2.26439		3	2		1.48919		Nucleus	0	0
IPI00006372	TEX264	Conserved hypothetical protein													1		3.52448	2		2		1.2919	Plasma Membrane	1	0.851
IPI00006377	POMP	PNAS-110	10		1		0.60486																Nucleus	0	0
IPI00006379	NOP5/NOP58	Nucleolar protein NOP5	4					5					11							6		9.62712	Nucleus	0	0	Yes
IPI00006408	NOSIP	NOSIP protein	3					5		3		1.50225	9		15		3.88672	2	1	1	1.15946	0.812618	Cytoplasm	0	0
IPI00006419	DPH5	Splice Isoform 2 of Probable diphthine synthase											1										Unknown	0	0.002
IPI00006437	HMG4L	HMG4L protein													2		6.04896						Unknown	0	0	Yes
IPI00006438	ERGIC3	Splice Isoform 1 of Serologically defined breast cancer antigen NY-BR-84	13															1	1		1.73919		Plasma Membrane	2	0.001
IPI00006440	MRPS7	Mitochondrial ribosomal protein S7 variant	24	3		0.427348		9					5		1		0.587414	9					Cytoplasm	0	0.537	Yes
IPI00006451	NSF	Vesicle-fusing ATPase	17					10					8					7					Cytoplasm	0	0	Yes
IPI00006482	ATP1A1	Splice Isoform Long of Sodium/potassium-transporting ATPase alpha-1 chain precursor	65	47	42	2.31381	3.61281	57	1	80	0.10304	3.70161	44		60		3.3882	29	26	202	2.18126	9.71488	Plasma Membrane	10	0	Yes
IPI00006504	EIF2B3	Splice Isoform 1 of Translation initiation factor eIF-2B gamma subunit		1		4.2279																	Cytoplasm	0	0.039
IPI00006516	UNG	Splice Isoform 1 of Uracil-DNA glycosylase	1																				Nucleus	0	0.078
IPI00006538	PTDSS2	Phosphatidylserine synthase 2																1	1	5	1.73919	4.09463	Plasma Membrane	7	0
IPI00006557	PJA2	Zn-finger, RING domain containing protein											6										Cytoplasm	0	0	Yes
IPI00006558	SH3GLB1	Splice Isoform 1 of SH3 domain GRB2-like protein B1	4					4					11					2					Cytoplasm	0	0.001
IPI00006579	COX4I1	Cytochrome c oxidase subunit IV isoform 1, mitochondrial precursor	26	6	3	0.754348	0.665199						9		3		0.857344	13	1		0.248455		Plasma Membrane	1	0.106
IPI00006580	FAM117A	C/EBP-induced protein	2																				Unknown	0	0.018
IPI00006592	MSRA	Peptide methionine sulfoxide reductase																1					Cytoplasm	0	0.943
IPI00006602	NDEL1	NudE nuclear distribution gene E homolog like 1 (A. nidulans), isoform B								2		6.34234											Nucleus	0	0
IPI00006606	MRPS26	28S ribosomal protein S26, mitochondrial precursor	6					4										1					Cytoplasm	0	0.03	Yes
IPI00006608	APP	Splice Isoform APP770 of Amyloid beta A4 protein precursor	12	100	6	24.9069	2.68621						2	19	96	47.3607	81.1167		2		5.95675		Plasma Membrane	1	1	Yes
IPI00006615	CLPB	Splice Isoform 1 of Suppressor of potassium transport defect 3	7					1															Nucleus	0	0.593
IPI00006648	RABGAP1L	IDN4-GGTR14 protein	6																	1		2.43785	Unknown	0	0.618
IPI00006657	FAM20B	Protein FAM20B precursor	1																				Plasma Membrane	1	0.537
IPI00006658	PIN4	Protein	7	5		2.14244		3					25	2		0.609644			5		13.3919		Nucleus	0	0.001
IPI00006662	APOD	Apolipoprotein D precursor																3		10		3.84463	Extracellular Space	0	1	Yes
IPI00006663	ALDH2	Aldehyde dehydrogenase, mitochondrial precursor		2	4	7.4558	23.6138	12		4		0.898821						44	23	51	1.28895	1.65179	Cytoplasm	0	0.845	Yes
IPI00006666	SLC16A3	Monocarboxylate transporter 4		1		4.2279		3											1	3	3.47837	5.31356	Plasma Membrane	12	0.305
IPI00006672	SLC31A1	High-affinity copper uptake protein 1																		2		3.87571	Plasma Membrane	2	0	Yes
IPI00006684	API5	Splice Isoform 4 of Apoptosis inhibitor 5	17	6		1.13152		9	3	5	1.5929	1.43558		2	3	15.8507	8.57344	2		6		3.20904	Cytoplasm	0	0
IPI00006702	PELP1	PELP1	6	5		2.4485				5		14.3558	1		2		3.02448	3	3	1	2.10878	0.609463	Nucleus	0	0.847
IPI00006713	DNAJC3	Splice Isoform 1 of DnaJ homolog subfamily C member 3	6					5					2		5		4.5408	14		1		0.162524	Cytoplasm	0	0.889
IPI00006715	RAD21	Double-strand-break repair protein rad21 homolog	1					2					2	1		2.80846		4					Nucleus	0	0.004
IPI00006721	OPA1	Dynamin-like 120 kDa protein, mitochondrial precursor	2					13					6					2					Cytoplasm	0	0.438
IPI00006723	WDR57	WD-repeat protein 57	4					2					2		1		1.17483	3					Nucleus	0	0.005
IPI00006725	DDX23	Probable ATP-dependent RNA helicase DDX23	2															9					Nucleus	0	0
IPI00006732	NTN1	Netrin-1 precursor	5	8		4.47053																	Plasma Membrane	1	0.999
IPI00006752	MAP4K4	Splice Isoform 1 of Mitogen-activated protein kinase kinase kinase kinase 4	1										5										Cytoplasm	0	0
IPI00006754	WDR68	WD-repeat protein 68	4																				Cytoplasm	0	0
IPI00006779	EIF4E2	EIF4EL3 protein	8										2										Cytoplasm	0	0
IPI00006780	AIF1	Allograft inflammatory factor 1																8	1		0.386486		Nucleus	0	0
IPI00006800	ATG5	Splice Isoform Long of Autophagy protein 5	6					1															Cytoplasm	0	0
IPI00006863	SPAG7	Sperm aSSociated antigen 7	1										2					2					Nucleus	0	0.087
IPI00006864	MRPL33	Ribosomal protein L33-like protein								1		3.67117	4		1		0.704896	1					Unknown	0	0.006
IPI00006865	SEC22B	Vesicle trafficking protein SEC22b	43	11	10	0.829702	1.3076	32		7		0.596915	25	2	23	0.609644	2.27166	11	8	52	1.73558	6.31403	Plasma Membrane	1	0.043
IPI00006900	SAS10	Something about silencing protein 10												1		8.42537							Nucleus	0	0.035
IPI00006902	FSCN3	Fascin-3		5		17.1395								1		8.42537							Unknown	0	0
IPI00006904	AVEN	Cell death regulator Aven	3																				Cytoplasm	0	0.007	Yes
IPI00006906	C12orf4	Protein C12orf4											1										Unknown	0	0
IPI00006907	C12orf5	Protein C12orf5	3					6	1	1	0.853763	0.524453	1					1					Unknown	0	0
IPI00006931	PHF20L1	CGI-72 protein																1					Unknown	0	0
IPI00006932	LUC7L2	LUC7-like 2	19	6		1.01837		5		8		3.72823	7	2		1.98134			5	7	13.3919	11.065	Unknown	0	0.001
IPI00006937	UBE2J1	Ubiquitin-conjugating enzyme E2 J1																1					Plasma Membrane	1	0
IPI00006952	LACTB2	Lactamase, beta 2 variant	12	1		0.325223		12	4		1.6081		3	1		2.10634		2					Unknown	0	0.001
IPI00006957	DHRS7	Splice Isoform 1 of Dehydrogenase/reductase SDR family member 7 precursor	8	2		0.828422		5					2					3	1	7	0.869593	2.76624	Plasma Membrane	1	0.986	Yes
IPI00006970	MRPS2	Mitochondrial 28S ribosomal protein S2	1																				Cytoplasm	0	0.022
IPI00006971	CD248	Tumor endothelial marker 1																3	1		0.869593		Plasma Membrane	1	1	Yes
IPI00006979	LYRM4	Protein C6orf149	1					1					2					2					Unknown	0	0.006
IPI00006980	C14orf166	Protein C14orf166	12		26		11.3838	10	1	7	0.543303	1.79074	7	3	6	2.90951	2.01836	1					Nucleus	0	0
IPI00006988	RETN	Resistin precursor																1					Extracellular Space	0	1
IPI00006991	CDKN1B	Cyclin-dependent kinase inhibitor 1B											1						3		8.43512		Nucleus	0	0
IPI00007001	MRPL11	39S ribosomal protein L11, mitochondrial precursor	4					2					2					3					Cytoplasm	0	0.268
IPI00007019	PPIL1	Peptidyl-prolyl cis-trans isomerase-like 1	9	3	4	1.06837	2.36138	5	2		1.82545		8					2					Plasma Membrane	0	0
IPI00007021	MED31	Mediator of RNA polymerase II transcription subunit 31	1										1										Nucleus	0	0
IPI00007024	FAM96B	Hypothetical UPF0195 protein CGI-128	3		2		3.07673	8		1		0.407908	3		1		0.88112						Unknown	0	0.003	Yes
IPI00007034	UBAC2	Hypothetical protein FLJ30001						1		1		1.83558											Plasma Membrane	2	0.113
IPI00007047	S100A8	Calgranulin A	3		1		1.66336											59	9	13	0.388423	0.328202	Cytoplasm	0	0	Yes
IPI00007049	MRPS18C	28S ribosomal protein S18c, mitochondrial precursor								3		9.01351	2										Cytoplasm	0	0.732	Yes
IPI00007052	FIS1	Tetratricopeptide repeat protein 11	3		1		1.66336			3		9.01351	4					2					Plasma Membrane	1	0	Yes
IPI00007057	ZFYVE20	Rabenosyn-5	2																				Cytoplasm	0	0
IPI00007058	PTPRCAP	Coronin-1B	38					37	1	16	0.157272	1.15102	10		5		1.2384	13	6	8	1.13359	0.893059	Unknown	0	0	Yes
IPI00007061	GOLT1B	UPF0198 protein CGI-141		1		4.2279				1		3.67117	1		1		1.76224						Plasma Membrane	3	0.036
IPI00007063	HDGFRP3	Hepatoma-derived growth factor-related protein 3						2					7	1		1.05317		2	2		1.98558		Nucleus	0	0
IPI00007067	C9orf19	Golgi-associated plant pathogenesis-related protein 1	3					1							1		3.52448	8					Cytoplasm	0	0	Yes
IPI00007074	YARS	Tyrosyl-tRNA synthetase, cytoplasmic	37	8	1	0.705874	0.175091	20					28	1		0.29053		4	1		0.695675		Cytoplasm	0	0
IPI00007084	SLC25A13	Mitochondrial aspartate-glutamate carrier protein			1		6.65346	7		5		1.79448						6	1		0.49691		Cytoplasm	0	0
IPI00007087	FBXO2	F-box only protein 2						27	2		0.391167												Cytoplasm	0	0
IPI00007096	IFRG15	IFRG15 protein	2					1															Unknown	0	0
IPI00007102	GLOD4	Hypothetical protein	7					6	1		0.853763		7	3		2.90951		1					Unknown	0	0.005
IPI00007117	SERPINB2	Plasminogen activator inhibitor-2 precursor											101	18	26	1.32016	0.653299	2	13		11.0729		Extracellular Space	0	0.373	Yes
IPI00007118	SERPINE1	Plasminogen activator inhibitor-1 precursor											1	80	28	297.515	35.8427		18		45.6107		Extracellular Space	0	0.999	Yes
IPI00007138	DLGAP4	Splice Isoform 1 of Disks large-associated protein 4	6															1		2		1.93785	Plasma Membrane	0	0	Yes
IPI00007146	GINS2	DNA replication complex GINS protein PSF2	1										2										Nucleus	0	0	Yes
IPI00007148	LYRM2	Hypothetical protein DJ122O8.2	3																				Unknown	0	0.01
IPI00007155	VPS28	VPS28 protein homolog	13					1					5										Cytoplasm	0	0	Yes
IPI00007163	LSM7	U6 snRNA-associated Sm-like protein LSm7	5					3										2					Nucleus	0	0
IPI00007166	IER3IP1	HSPC039 protein	1					2		1		1.22372	1					1		1		1.21893	Plasma Membrane	1	0.991
IPI00007174	NAT5	N-acetyltransferase 5	1																				Cytoplasm	0	0
IPI00007175	NIP7	Splice Isoform 1 of 60S ribosome subunit biogenesis protein NIP7 homolog	2										2										Nucleus	0	0
IPI00007183	ARL6IP2	ADP-ribosylation-like factor 6 interacting protein 2	6	5	1	2.4485	0.950494			3		9.01351			1		3.52448	2		7		3.68833	Plasma Membrane	2	0
IPI00007188	SLC25A5	ADP/ATP translocase 2	27	15	16	1.76495	3.26626	22	3	40	0.692566	4.68899		2	16	15.8507	41.3917	16	7	22	1.07933	1.91958	Plasma Membrane	2	0.154	Yes
IPI00007189	CDC42	Splice Isoform 1 of Cell division control protein 42 homolog	60	4	2	0.228059	0.201753	15		21		3.56841	30							2		3.87571	Cytoplasm	0	0.006
IPI00007193	ANKRD26	Ankyrin repeAt domAin 26																		2		3.87571	Nucleus	0	0
IPI00007199	SERPINA10	Protein Z-dependent protease inhibitor precursor												1	3	8.42537	8.57344						Extracellular Space	0	0.003	Yes
IPI00007221	SERPINA5	Plasma serine protease inhibitor precursor							8	7	40.8107	19.6982						1		2		1.93785	Extracellular Space	0	1	Yes
IPI00007244	MPO	Splice Isoform H17 of Myeloperoxidase precursor		1		4.2279												75	17	37	0.567531	0.713166	Extracellular Space	0	0.977	Yes
IPI00007247	PCCB	Propionyl-CoA carboxylase beta chain, mitochondrial precursor																2					Extracellular Space	0	0.993
IPI00007248	PLEKHA6	Pleckstrin homology domain-containing protein family A member 6	1																				Unknown	0	0	Yes
IPI00007256	ZHX2	Zinc fingers and homeoboxes protein 2	9																				Nucleus	0	0.004
IPI00007257	CLSTN1	Alcadein alpha-1		65	9	210.813	51.8811		54	30	269.722	81.1351		19	29	142.082	74.21		2		5.95675		Plasma Membrane	1	1	Yes
IPI00007270	GGA1	GGA1 protein	3					4					1										Cytoplasm	0	0
IPI00007277	LRRFIP2	LRR FLI-I interacting protein 2											9							2		3.87571	Unknown	0	0
IPI00007283	POLR2D	DNA-directed RNA polymerase II 16 kDa polypeptide	2															2					Nucleus	0	0
IPI00007289	ALPP	Alkaline phosphatase, placental type 1 precursor						25	4	31	0.804052	3.22332								1		2.43785	Extracellular Space	0	1
IPI00007304	ARIH2	Ariadne-2 protein homolog	3	3		2.67092		1					1										Nucleus	0	0	Yes
IPI00007306	CFDP1	Splice Isoform 1 of Craniofacial development protein 1											4	1		1.68507							Extracellular Space	0	0
IPI00007309	TIMM23	Mitochondrial import inner membrane translocase subunit Tim23						2										2					Plasma Membrane	3	0.195
IPI00007320	TCF25	FKSG26 protein	2					2					3										Unknown	0	0
IPI00007321	LYPLA1	Splice Isoform 1 of Acyl-protein thioesterase 1	27	4		0.496843		1		1		1.83558	4					2					Cytoplasm	0	0.373	Yes
IPI00007327	TAPBP	TAPBP protein	2					10										13					Plasma Membrane	1	1
IPI00007334	ACIN1	Splice Isoform 1 of Apoptotic chromatin condensation inducer in the nucleus	3					8	4		2.32282		12	3		1.79047		16	10	10	1.51669	0.90462	Nucleus	0	0.005	Yes
IPI00007343	RNF113A	Zinc finger protein 183							1		5.97634		1					2	1		1.15946		Nucleus	0	0	Yes
IPI00007346	PPIH	Peptidyl-prolyl cis-trans isomerase H	21										4										Nucleus	0	0.004
IPI00007347	COG5	Conserved oligomeric Golgi complex component 5											3										Cytoplasm	0	0.018	Yes
IPI00007364	CLDN3	Claudin-3	4	4	2	2.78232	2.46138	3		3		2.25338								4		6.75141	Plasma Membrane	4	0.805
IPI00007365	TRIM38	Tripartite motif protein 38																1					Unknown	0	0.102
IPI00007401	IPO8	Importin-8																		1		2.43785	Nucleus	0	0
IPI00007402	IPO7	Importin-7	1	9	4	15.0255	11.8069	3	1	22	1.49408	14.9414	8	3	14	2.58624	4.03808			3		5.31356	Nucleus	0	0	Yes
IPI00007404	ATG7	Splice Isoform 1 of Autophagy protein 7-like	3					3					1										Cytoplasm	0	0.018
IPI00007423	ANP32B	Acidic leucine-rich nuclear phosphoprotein 32 family member B	40	14	3	1.1266	0.438058	10	5		2.35288		23		2		0.25204		6		15.8702		Nucleus	0	0	Yes
IPI00007425	DSC1	Desmocollin 1b		2		7.4558		1												9		13.9407	Plasma Membrane	1	0.995	Yes
IPI00007426	ARL6IP5	PRA1 family protein 3	6	2	1	1.06511	0.950494	4		1		0.734234	4		2		1.20979		4	23	10.9135	34.0706	Plasma Membrane	3	0
IPI00007427	AGR2	AGR2	4															11		3		0.442797	Extracellular Space	0	0.492
IPI00007607	YIF1A	54TMp													1		3.52448			3		5.31356	Plasma Membrane	5	0.001
IPI00007611	ATP5O	ATP synthase O subunit, mitochondrial precursor	14		6		2.32805	8		17		5.15665	9		22		5.65386	11					Cytoplasm	0	0.172	Yes
IPI00007634	LIMS1	Protein PINCH								1		3.67117	2		1		1.17483			2		3.87571	Plasma Membrane	0	0.127	Yes
IPI00007673	CHCHD2	Coiled-coil-helix-coiled-coil-helix domain containing protein 2	5					6					13					2					Unknown	0	0.839
IPI00007675	DYNC1LI1	Dynein light intermediate chain 1, cytosolic	19	1		0.211395		9					15					5					Cytoplasm	0	0.059	Yes
IPI00007676	HSD17B12	Steroid dehydrogenase homolog	11	10	3	2.77325	1.4967	2		6		5.67567	3		4		2.77448	10	18	28	4.14643	3.7509	Plasma Membrane	3	0.594
IPI00007682	ATP6V1A	Vacuolar ATP synthase catalytic subunit A, ubiquitous isoform	66	14	9	0.689412	0.774345	56	3	11	0.279456	0.533033	9		3		0.857344	16	6	47	0.933543	4.03407	Cytoplasm	0	0
IPI00007694	PPME1	Protein PhosPhatase methylesterase-1	5		2		2.05115	2	1		1.99211		14					1	1		1.73919		Unknown	0	0	Yes
IPI00007695	SYT3	Splice Isoform 1 of SH3 and multiple ankyrin repeat domains protein 1											1										Unknown	0	0	Yes
IPI00007702	HSPA2	Heat shock-related 70 kDa protein 2	165					154										50	27		1.33169		Cytoplasm	0	0.006	Yes
IPI00007713	KLK9	Kallikrein-9 precursor		1		4.2279																	Extracellular Space	0	1
IPI00007722	AMPD2	Adenosine monophosphate deaminase 2	3										12		1		0.271114	1					Unknown	0	0.015	Yes
IPI00007729	NOL7	Splice Isoform 1 of Nucleolar protein 7								3		9.01351	1										Nucleus	0	0.002
IPI00007730	C14orf1	Probable ergosterol biosynthetic protein 28	2																	1		2.43785	Plasma Membrane	4	0.923
IPI00007731	BAG5	BAG family molecular chaperone regulator 5	9					2		1		1.22372						2					Unknown	0	0	Yes
IPI00007736	EIF2C1	Eukaryotic translation initiation factor 2C 1	2										2										Cytoplasm	0	0.09	Yes
IPI00007750	TUBA4A	Tubulin alpha-1 chain	268	132	170	1.58767	3.57654	297		162		1.45547	290						34		85.2647		Cytoplasm	0	0.006	Yes
IPI00007751	CCL4	Small inducible cytokine A4 precursor																	5		13.3919		Plasma Membrane	1	1
IPI00007752	TUBB2C	Tubulin beta-2C chain	409	197	278	1.55341	3.83576	415	49	172	0.588559	1.10683	432		185		1.0809	81	39	57	1.19093	1.01168	Cytoplasm	0	0.001	Yes
IPI00007755	RAB21	Ras-related protein Rab-21	9	1		0.42279		12		1		0.282398	2					2		1		0.812618	Cytoplasm	0	0.244
IPI00007756	RAB22A	Ras-related protein Rab-22A	6					1												2		3.87571	Cytoplasm	0	0.003	Yes
IPI00007764	HN1	Hematological and neurological expressed 1 isoform 1 variant	19	3		0.534185		13					34	6		1.30149		4	1		0.695675		Nucleus	0	0
IPI00007765	HSPA9	Stress-70 protein, mitochondrial precursor	297	47	22	0.512454	0.420725	136	1	45	0.0436229	0.884691	220	6	40	0.206119	0.461445	182	35	89	0.47947	0.704748	Cytoplasm	0	0.825	Yes
IPI00007778	CTBS	Di-N-acetylchitobiase precursor							4	3	20.9054	9.01351						4	2		1.19135		Extracellular Space	0	1	Yes
IPI00007793	IL6	Interleukin-6 precursor							2		10.9527								1	2	3.47837	3.87571	Extracellular Space	0	0.999
IPI00007797	LOC728641	Fatty acid-binding protein, epidermal	24	13		1.71851		5	7		5.97239		51	14	9	2.01837	0.45616	19	11		1.4131		Unknown	0	0	Yes
IPI00007798	TRHDE	Thyrotropin-releasing hormone degrading ectoenzyme		30	8	97.837	46.2277			1		3.67117			11		28.7693						Plasma Membrane	1	0	Yes
IPI00007811	CDK4	Cell division protein kinase 4	22	5		0.745196																	Nucleus	0	0
IPI00007812	ATP6V1B2	Vacuolar ATP synthase subunit B, brain isoform	30	10	3	1.07352	0.579367	1		1		1.83558	12					27	7	8	0.655307	0.44653	Cytoplasm	0	0.01	Yes
IPI00007814	ATP6V1C1	Vacuolar ATP synthase subunit C	6					3		2		1.58558	6					2					Cytoplasm	0	0.005
IPI00007834	ANK2	Splice Isoform 1 of Ankyrin-2											3										Plasma Membrane	0	0	Yes
IPI00007847	UBE2V1	Splice Isoform 6 of Ubiquitin-conjugating enzyme E2 variant 1	61	7		0.380569		14	3		1.06193		4	1		1.68507		1					Nucleus	0	0
IPI00007853	IFI30	Gamma-interferon inducible lysosomal thiol reductase precursor	4	3		2.13674			3		15.929							40	4		0.266183		Plasma Membrane	1	0.999
IPI00007856	MYH2	Myosin heavy chain, skeletal muscle, adult 2																	4		10.9135		Cytoplasm	0	0	Yes
IPI00007865	RGNEF	Hypothetical protein FLJ21817											1										Unknown	0	0	Yes
IPI00007874	SOX17	Transcription factor SOX-17	3															2					Nucleus	0	0.003
IPI00007909	RABAC1	Prenylated Rab acceptor protein 1	3	3	1	2.67092	1.66336	1												1		2.43785	Plasma Membrane	2	0
IPI00007926	C6orf108	c-Myc-responsive protein Rcl	8	3		1.18708		29	4	2	0.696845	0.211411	7										Nucleus	0	0
IPI00007927	SMC2	Splice Isoform 1 of Structural maintenance of chromosome 2-like 1 protein											5		2		1.00816						Nucleus	0	0
IPI00007928	PRPF8	Pre-mRNA processing splicing factor 8	26	4		0.515244		24		1		0.146847	6		11		4.1099	9	21	28	5.30458	4.12599	Nucleus	0	0	Yes
IPI00007935	PDLIM5	PDZ and LIM domain protein 5	27	4		0.496843			1		5.97634			1		8.42537		5	2		0.992791		Cytoplasm	0	0.006
IPI00007940	ERLIN1	Band 7 protein family protein			1		6.65346						6										Plasma Membrane	1	0.5	Yes
IPI00007941	HEXIM1	HEXIM1 protein	2	3		3.56123		5	1		0.996056		7					1	2	2	2.97837	1.93785	Nucleus	0	0
IPI00007943	STAMBP	STAM-binding protein	11					4					1					1					Nucleus	0	0
IPI00007961	MT-ND1	NADH-ubiquinone oxidoreductase chain 1																		3		5.31356	Plasma Membrane	8	0.94
IPI00007979	ND2	NADH-ubiquinone oxidoreductase chain 2																		1		2.43785	Plasma Membrane	9	0.372
IPI00007983	PDLIM2	Splice Isoform 3 of PDZ and LIM domain protein 2											1					4					Cytoplasm	0	0.004
IPI00008085	SLC39A10	Hypothetical protein	1	2	2	3.7279	6.15346						1		18		23.2203			6		9.62712	Plasma Membrane	7	0.977
IPI00008157	KIAA1211	Hypothetical protein FLJ44026											1										Unknown	0	0.002	Yes
IPI00008164	PREP	Prolyl endopeptidase	22	6	7	0.885539	1.7641	2		6		5.67567	4		3		1.71469						Cytoplasm	0	0
IPI00008167	ATP1B3	Sodium/potassium-transporting ATPase beta-3 chain	9		2		1.23069	16	1	9	0.351549	1.47297	7		2		0.75612	6		9		1.99153	Plasma Membrane	1	0
IPI00008179	SULT2B1	Splice Isoform 1 of Sulfotransferase family cytosolic 2B member 1	1					1															Cytoplasm	0	0	Yes
IPI00008207	MAN1B1	Endoplasmic reticulum mannosyl-oligosaccharide 1,2-alpha-mannosidase												2		15.8507		4	1	1	0.695675	0.487571	Plasma Membrane	1	0.035	Yes
IPI00008214	NDUFV3	NADH-ubiquinone oxidoreductase 9 kDa subunit, mitochondrial precursor	2					8					15		4		0.69362	18		7		0.582367	Cytoplasm	0	0.071
IPI00008215	ME1	NADP-dependent malic enzyme	22	3		0.464509		33	4	1	0.614863	0.107976	1						2		5.95675		Cytoplasm	0	0	Yes
IPI00008219	RAD23A	UV excision repair protein RAD23 homolog A	9	2		0.74558		14	1		0.398423		7					5	1		0.579729		Nucleus	0	0	Yes
IPI00008223	RAD23B	UV excision repair protein RAD23 homolog B	32	11	3	1.10627	0.544254	47	3		0.331854		25	9		2.60878		5	3		1.40585		Nucleus	0	0	Yes
IPI00008234	CYB5R2	Cytochrome b5 reductase b5R.2	3					7															Unknown	0	0	Yes
IPI00008239	GPRC5B	G-protein coupled receptor family C group 5 member B precursor																		2		3.87571	Plasma Membrane	8	0.969
IPI00008240	MARS	Methionyl-tRNA synthetase	30	7	2	0.761139	0.396997	14		4		0.778978	35	2	19	0.440299	1.36014	1	1	4	1.73919	3.37571	Cytoplasm	0	0.821
IPI00008269	NDRG4	Hypothetical protein FLJ16174						2															Unknown	0	0
IPI00008274	CAP1	Adenylyl cyclase-associated protein 1	171	72	14	1.35703	0.465979	173	20	9	0.57774	0.143911	86	6	14	0.523589	0.417733	48	29	26	1.4872	0.783351	Plasma Membrane	0	0	Yes
IPI00008289	BRCC3	Splice Isoform 2 of C6.1A protein																2					Unknown	0	0.039
IPI00008305	HPCAL4	Hippocalcin-like protein 4						2															Unknown	0	0
IPI00008327	EDN1	Endothelin-1 precursor												2		15.8507							Extracellular Space	0	0.999
IPI00008332	MYT1	Myelin transcription factor 1																		1		2.43785	Nucleus	0	0
IPI00008338	ABCC1	Splice Isoform Delexon-17 of Multidrug resistance-associated protein 1								2		6.34234			4		11.0979		3		8.43512		Plasma Membrane	16	0	Yes
IPI00008339	C14orf173	Hypothetical protein C14orf173	1					10	3	2	1.44809	0.576576							2		5.95675		Unknown	0	0
IPI00008351	SELT	Selenoprotein T precursor	2										1					10	2	4	0.541522	0.613765	Extracellular Space	0	1
IPI00008359	KRT76	Keratin, type II cytoskeletal 2 oral								17		46.4099											Unknown	0	0.012	Yes
IPI00008380	PPP2CA	Serine/threonine protein phosphatase 2A, catalytic subunit, alpha isoform	36	16		1.42288		2					10					6	1		0.49691		Cytoplasm	0	0	Yes
IPI00008418	DIABLO	Splice Isoform 1 of Diablo homolog, mitochondrial precursor	23	4	6	0.57965	1.45503	4		1		0.734234						7	1	6	0.434797	1.20339	Cytoplasm	0	0.016
IPI00008433	RPS5	40S ribosomal protein S5	20	6	1	0.969876	0.316831	22		96		11.1927	15		4		0.69362	4		19		5.66384	Cytoplasm	0	0	Yes
IPI00008436	POLE4	DNA polymerase epsilon subunit 4						1															Nucleus	0	0.002
IPI00008437	C15orf15	Probable ribosome biogenesis protein RLP24											3										Nucleus	0	0.003
IPI00008438	RPS10	40S ribosomal protein S10	28	6	4	0.702324	0.81427	32	1	29	0.181101	2.37769	11						3		8.43512		Cytoplasm	0	0.001	Yes
IPI00008439	SS18L2	SS18-like protein 2	2																				Unknown	0	0.001
IPI00008449	FIP1L1	Hypothetical protein DKFZp586K0717											2	1		2.80846		9					Nucleus	0	0
IPI00008453	CORO1C	Coronin-1C	9	1		0.42279				6		17.027	55	13	32	1.7416	1.46042	18	3	29	0.443954	2.24725	Cytoplasm	0	0
IPI00008454	DNAJB11	DnaJ homolog subfamily B member 11 precursor	14					22	8	8	1.77438	0.972581	11		1		0.293707	20		2		0.184557	Plasma Membrane	1	0.982
IPI00008455	MYO6	Splice Isoform 2 of Myosin-6						7		1		0.458896	1		4		5.54896	9	2	13	0.595675	1.96921	Cytoplasm	0	0	Yes
IPI00008461	POLR3K	DNA-directed RNA polymerases III 12.5 kDa polypeptide											2					3					Nucleus	0	0.001
IPI00008475	HMGCS1	Hydroxymethylglutaryl-CoA synthase, cytoplasmic	116	25	25	0.698269	1.21655	39		13		0.89313	3		3		2.14336						Cytoplasm	0	0.001
IPI00008477	TPX2	Targeting protein for Xklp2											2					3					Nucleus	0	0	Yes
IPI00008485	ACO1	Iron-responsive element binding protein 1	15	1		0.264244		5		1		0.611862	35	1	5	0.234038	0.3784		1		3.47837		Cytoplasm	0	0	Yes
IPI00008490	UNC93B1	UNC93 homolog B1	1	1		2.11395		2		2		2.11411						1	2	4	2.97837	3.37571	Plasma Membrane	12	0
IPI00008494	ICAM1	Intercellular adhesion molecule 1 precursor		1	2	4.2279	12.3069	30	10	44	1.63753	3.8236	4		3		1.71469	9	41	2	10.2613	0.387571	Plasma Membrane	1	1	Yes
IPI00008495	ND4	NADH-ubiquinone oxidoreductase chain 4		1		4.2279																	Plasma Membrane	10	0.797	Yes
IPI00008511	MT-ND5	NADH-ubiquinone oxidoreductase chain 5		1		4.2279														5		8.18927	Plasma Membrane	15	0.789
IPI00008524	PABPC1	Splice Isoform 1 of Polyadenylate-binding protein 1	61	8	1	0.432632	0.107314	55	4	5	0.37331	0.256354	53	6	6	0.84356	0.299016	27		13		0.703289	Cytoplasm	0	0.012	Yes
IPI00008527	RPLP1	60S acidic ribosomal protein P1	26	4	2	0.515244	0.455812	19	5	6	1.29408	0.851351	19					7	1		0.434797		Cytoplasm	0	0.042
IPI00008528	MT-ATP8	ATP synthase protein 8			1		6.65346						2										Plasma Membrane	1	0.376
IPI00008529	RPLP2	60S acidic ribosomal protein P2	47	8	2	0.558817	0.256394	71	10		0.705047		32	3	1	0.705337	0.106802	19	4		0.545675		Cytoplasm	0	0.835	Yes
IPI00008530	RPLP0	60S acidic ribosomal protein P0	79	21	11	0.859824	0.789851	45	11	9	1.21173	0.544359	62		14		0.576869	8	6		1.76336		Cytoplasm	0	0
IPI00008531	RCOR1	CoREST protein	5										2										Extracellular Space	0	0.999
IPI00008542	FBXO28	F-box only protein 28						2															Unknown	0	0
IPI00008552	TXNL2	Thioredoxin-like protein 2	17	6		1.13152		15		2		0.396396	16		2		0.355821						Cytoplasm	0	0.182
IPI00008556	F11	Splice Isoform 1 of Coagulation factor XI precursor													3		8.57344						Extracellular Space	0	0.938	Yes
IPI00008557	IGF2BP1	MRNA-binding protein CRDBP											11										Nucleus	0	0
IPI00008561	MMP1	Interstitial collagenase precursor											36	674	407	135.289	27.7963		2		5.95675		Extracellular Space	0	1
IPI00008569	YKT6	SNARE protein Ykt6	12	4		1.07012		4		1		0.734234			2		6.04896			1		2.43785	Cytoplasm	0	0.027
IPI00008575	KHDRBS1	Splice Isoform 1 of KH domain containing, RNA binding, signal transduction associated protein 1	23	3		0.445154		12	1	1	0.459718	0.282398	19	1	2	0.421269	0.302448	9	3	3	0.843512	0.531356	Nucleus	0	0
IPI00008580	SLPI	Antileukoproteinase 1 precursor		100		323.79			3		15.929								15		38.1756		Extracellular Space	0	0.999	Yes
IPI00008599	EBP	3-beta-hydroxysteroid-delta(8),delta(7)-isomerase	4	2		1.49116							4		3		1.71469		6		15.8702		Plasma Membrane	5	0.011
IPI00008613	IFI35	Splice Isoform 1 of Interferon-induced 35 kDa protein	3					3										3					Nucleus	0	0.001
IPI00008616	SLC12A7	Splice Isoform 1 of Solute carrier family 12 member 7																2					Plasma Membrane	11	0.006	Yes
IPI00008708	RSL1D1	Ribosomal L1 domain-containing protein 1	4					1		3		4.50675	8										Cytoplasm	0	0.558
IPI00008711	WFS1	Wolframin											1		4		5.54896						Plasma Membrane	9	0
IPI00008714	ANXA9	Annexin A9	2															1					Plasma Membrane	0	0.137
IPI00008728	CLPX	ATP-dependent Clp protease ATP-binding subunit ClpX-like, mitochondrial precursor	3										2										Cytoplasm	0	0.932
IPI00008770	GSTM4	Glutathione S-transferase M4, isoform 1						7															Unknown	0	0.015	Yes
IPI00008780	STC2	Stanniocalcin-2 precursor		21		68.7859			12		60.7161			6	5	45.5522	13.6224		1		3.47837		Extracellular Space	0	0.996
IPI00008787	NAGLU	Alpha-N-acetylglucosaminidase precursor		1		4.2279				1		3.67117											Extracellular Space	0	1	Yes
IPI00008822	PRRX1	Splice Isoform PMX1-B of Paired mesoderm homeobox protein 1													3		8.57344						Nucleus	0	0
IPI00008830	FGF18	Fibroblast growth factor 18 precursor		2		7.4558																	Extracellular Space	0	0.991
IPI00008832	GAS1	Growth-arrest-specific protein 1 precursor	4																	5		8.18927	Extracellular Space	0	0.995
IPI00008847	LOC647743	G protein-coupled receptor 89 variant																		2		3.87571	Plasma Membrane	5	0.015
IPI00008868	MAP1B	Microtubule-associated protein 1B							1		5.97634		48	7	2	1.08118	0.123448	1					Cytoplasm	0	0	Yes
IPI00008883	NUAK2	Hypothetical protein DKFZp434J037											1										Unknown	0	0.003
IPI00008894	CPA4	Carboxypeptidase A4 precursor											18	92	68	36.0071	9.08762						Extracellular Space	0	0.99	Yes
IPI00008917	DCDC2	Splice Isoform 1 of Doublecortin domain-containing protein 2	2					1															Unknown	0	0.001
IPI00008918	LIMA1	Splice Isoform Beta of Epithelial protein lost in neoplasm	2	1		1.4093		30	4	2	0.674366	0.204592	20					13	2	5	0.425482	0.584948	Cytoplasm	0	0.002	Yes
IPI00008922	IFITM2	Interferon-induced transmembrane protein 2	1												1		3.52448	7	2		0.744593		Plasma Membrane	2	0
IPI00008943	DDX19B	Splice Isoform 1 of ATP-dependent RNA helicase DDX19B											6		1		0.503497	1					Nucleus	0	0.003
IPI00008944	SCG5	Splice Isoform 1 of Neuroendocrine protein 7B2 precursor							7		35.8344												Extracellular Space	0	1	Yes
IPI00008961	TERF2IP	Telomeric repeat binding factor 2 interacting protein 1	4					1					5					2		1		0.812618	Nucleus	0	0	Yes
IPI00008964	RAB1B	Ras-related protein Rab-1B	56	20	21	1.15014	2.1004	29		30		2.7045	19	2	15	0.792537	1.94336			17		25.4435	Cytoplasm	0	0.002	Yes
IPI00008965	JUN	Transcription factor AP-1											3		3		2.14336						Nucleus	0	0	Yes
IPI00008982	ALDH18A1	Splice Isoform Long of Delta 1-pyrroline-5-carboxylate synthetase	26	10	3	1.23256	0.665199	13		3		0.643822	37		2		0.159183	18	2		0.313513		Cytoplasm	0	0.001	Yes
IPI00008986	SLC7A5	Large neutral amino acids transporter small subunit 1	2	4	2	4.6372	4.10231	2		1		1.22372	2		6		5.3823		1	7	3.47837	11.065	Plasma Membrane	11	0
IPI00008991	DR1	TATA-binding protein-associated phosphoprotein	5		1		1.10891	2					3					1					Nucleus	0	0
IPI00008994	NDRG2	Splice Isoform 1 of NDRG2 protein	11					7															Cytoplasm	0	0
IPI00008998	PTPLAD1	HSPC121	5	5	3	2.85658	2.9934	5		6		2.83784	4		4		2.21959		1	4	3.47837	6.75141	Plasma Membrane	5	0
IPI00009005	TFAP4	Transcription factor AP-4						1															Nucleus	0	0
IPI00009009	HSPC148	HSPC148											3					1					Nucleus	0	0
IPI00009010	HSPC152	UPF0315 protein AD-001	8		3		1.9956	4		6		3.4054	6		6		2.3067	2	2		1.98558		Unknown	0	0.221
IPI00009030	LAMP2	Splice Isoform LAMP-2A of Lysosome-associated membrane glycoprotein 2 precursor	5		11		10.5313	1		9		12.5203						4	4	6	2.1827	1.92542	Plasma Membrane	1	0.991	Yes
IPI00009032	SSB	Lupus La protein	66	19	1	0.9303	0.0993054	45	5	6	0.562645	0.370153	30		5		0.439432	15	3		0.527195		Nucleus	0	0
IPI00009054	BMP1	Splice Isoform BMP1-3 of Bone morphogenetic protein 1 precursor		3		10.6837			7	4	35.8344	11.6847		2		15.8507			1		3.47837		Extracellular Space	0	0.999	Yes
IPI00009057	G3BP2	Splice Isoform A of Ras-GTPase-activating protein binding protein 2	15	3		0.667731		6	1	1	0.853763	0.524453	6		2		0.864138	9		1		0.243785	Nucleus	0	0
IPI00009070	HBS1L	Splice Isoform 1 of HBS1-like protein	4					5															Cytoplasm	0	0	Yes
IPI00009071	LOC727922	Splice Isoform 3 of FUS-interacting serine-arginine-rich protein 1		2		7.4558		5	1		0.996056		6					2		3		1.77119	Unknown	0	0.001
IPI00009104	RUVBL2	RuvB-like 2	100	26	11	0.840845	0.625624	12		4		0.898821	34		3		0.244956	8	2		0.661861		Nucleus	0	0
IPI00009111	TPBG	Trophoblast glycoprotein precursor						3		10		6.92792			12		31.2938			2		3.87571	Plasma Membrane	1	1
IPI00009123	NUCB2	Nucleobindin 2 precursor	6					15		1		0.229448	9		3		0.857344	11	2		0.496395		Plasma Membrane	1	0.992
IPI00009137	CPSF4	Splice Isoform 1 of Cleavage and polyadenylation specificity factor, 30 kDa subunit																1					Nucleus	0	0	Yes
IPI00009145	MAN1A2	Mannosyl-oligosaccharide 1,2-alpha-mannosidase IB								1		3.67117			2		6.04896						Plasma Membrane	1	0.013
IPI00009146	TRAFD1	FLN29 gene product	3										2										Unknown	0	0	Yes
IPI00009148	NUDT3	Diphosphoinositol polyphosphate phosphohydrolase 1	3					1										1					Cytoplasm	0	0	Yes
IPI00009149	SUGT1	SGT1, suppressor of G2 allele of SKP1	12					2					6					3					Unknown	0	0.013
IPI00009198	TFPI2	Tissue factor pathway inhibitor 2 precursor		2		7.4558			9		45.787		4	12	4	18.0209	2.21959	2	8	1	6.94233	0.812618	Extracellular Space	0	1
IPI00009210	DUSP12	Dual specificity protein phosphatase 12	1																				Nucleus	0	0
IPI00009225	STX8	Syntaxin-8						1												14		21.13	Plasma Membrane	1	0
IPI00009235	SSR3	Translocon-associated protein gamma subunit	2		1		2.21782			4		11.6847	3		7		4.66784		3	10	8.43512	15.3785	Plasma Membrane	4	0.001
IPI00009236	CAV1	Caveolin-1	3	3	2	2.67092	3.07673	2		1		1.22372	14		11		1.91795			3		5.31356	Plasma Membrane	1	0
IPI00009243	LEPR	Splice Isoform B of Leptin receptor precursor			2		12.3069																Plasma Membrane	3	0.504
IPI00009247	C14orf2	Full-length cDNA clone CS0DC006YH13 of Neuroblastoma of Homo sapiens	2																				Plasma Membrane	1	0
IPI00009253	NAPA	Alpha-soluble NSF attachment protein	5					3					8					15	2		0.372297		Cytoplasm	0	0	Yes
IPI00009268	ACY1	Aminoacylase-1	13	3		0.763121		2					1										Cytoplasm	0	0	Yes
IPI00009276	PROCR	Endothelial protein C receptor precursor																	3	4	8.43512	6.75141	Plasma Membrane	1	0.726	Yes
IPI00009286	MLL	Splice Isoform 1 of Zinc finger protein HRX																1					Nucleus	0	0.205	Yes
IPI00009294	CRIM1	Cysteine-rich motor neuron 1 protein precursor		13		42.9627			6		30.858			4	1	30.7015	3.52448		4		10.9135		Plasma Membrane	1	0.995	Yes
IPI00009301	COPS7B	Splice Isoform 1 of COP9 signalosome complex subunit 7b	10					6	2		1.56467		4					1		2		1.93785	Unknown	0	0.116
IPI00009305	GNPDA1	Glucosamine-6-phosphate isomerase	36	14	9	1.24839	1.40219	8	2	4	1.21696	1.2983	5	2	2	2.64179	1.00816			1		2.43785	Cytoplasm	0	0	Yes
IPI00009308	CCL2	Small inducible cytokine A2 precursor																	7		18.3486		Extracellular Space	0	1
IPI00009315	ACBD3	Golgi resident protein GCP60	29	3		0.356123		20	3		0.758524		2					7		1		0.304732	Cytoplasm	0	0
IPI00009316	PPIE	Splice Isoform A of Peptidyl-prolyl cis-trans isomerase E	3	2		1.86395		4					1					1					Nucleus	0	0.002
IPI00009326	YAP1	65 kDa Yes-associated protein	20					16	1		0.351549		6										Nucleus	0	0
IPI00009328	EIF4A3	Probable ATP-dependent helicase DDX48	32	9	7	0.910639	1.22952	28					32	1	8	0.255314	0.642299	28	13	9	1.14548	0.480713	Nucleus	0	0	Yes
IPI00009329	UTRN	Utrophin						1					1										Plasma Membrane	0	0
IPI00009333	TMEM9	Transmembrane protein 9 precursor	4					1												1		2.43785	Plasma Membrane	1	1
IPI00009335	C8orf30A	Brain protein 16	3					3					3										Unknown	0	0.024
IPI00009342	IQGAP1	Ras GTPase-activating-like protein IQGAP1	32	10	4	1.00845	0.715571	131	1900-01-21	37	0.799266	0.756313	103	7	25	0.5094	0.616462	35	27	69	1.88656	2.78366	Cytoplasm	0	0	Yes
IPI00009346	TMEM14C	Transmembrane protein 14C	17	2	2	0.414211	0.683718	11	2	9	0.912723	2.08671							1	2	3.47837	3.87571	Plasma Membrane	4	0.388
IPI00009350	TMEM138	HSPC198																		1		2.43785	Plasma Membrane	4	0.687
IPI00009364	ORMDL1	ORM1-like protein 1						1															Plasma Membrane	2	0.064
IPI00009365	C14orf112	Protein C14orf112 precursor						1	1		2.98817							1					Plasma Membrane	1	0.897	Yes
IPI00009368	SFXN1	Sideroflexin-1	9					37					10					3					Plasma Membrane	3	0
IPI00009374	C14orf129	UPF0279 protein C14orf129	5					1															Unknown	0	0
IPI00009384	CDKN1A	Cyclin-dependent kinase inhibitor 1						1															Nucleus	0	0
IPI00009407	DAD1	Defender against cell death 1	6	3		1.52624									2		6.04896		1	7	3.47837	11.065	Plasma Membrane	3	0.005
IPI00009443	MRPL30	HSPC249						1					3					3					Cytoplasm	0	0
IPI00009444	MRPL27	Mitochondrial 39S ribosomal protein L27						1					2					10					Extracellular Space	0	0.979
IPI00009456	NT5E	5'-nucleotidase precursor			1		6.65346	2		4		3.89489	40	2	247	0.386604	15.2329						Plasma Membrane	2	1
IPI00009464	EXOSC10	Splice Isoform 1 of Exosome component 10											6										Nucleus	0	0.013	Yes
IPI00009471	WDR3	WD-repeat protein 3																		1		2.43785	Cytoplasm	0	0.036
IPI00009477	ICAM2	Intercellular adhesion molecule 2 precursor						3	4	1	5.22634	0.917792							1	7	3.47837	11.065	Plasma Membrane	1	0.733	Yes
IPI00009480	COPS8	COP9 signalosome complex subunit 8	5	2	2	1.24263	2.05115	9	2		1.09527		7					1					Cytoplasm	0	0.001
IPI00009504	SLC20A2	Leukemia virus receptor 2	2	1		1.4093									1		3.52448						Plasma Membrane	9	0.475
IPI00009507	SYPL1	Splice Isoform 1 of Synaptophysin-like protein	1	1	2	2.11395	6.15346	1		1		1.83558								13		19.6921	Plasma Membrane	3	0.002
IPI00009521	MARCO	Macrophage receptor MARCO																5	9	3	3.88423	0.885593	Plasma Membrane	1	0	Yes
IPI00009533	CDC42EP2	Cdc42 effector protein 2											1										Plasma Membrane	0	0
IPI00009542	MAGED2	Splice Isoform 1 of Melanoma-associated antigen D2	11					25	1		0.229859		47		8		0.44158	2		3		1.77119	Plasma Membrane	0	0	Yes
IPI00009544	RALBP1	RalA-binding protein 1	1										1										Cytoplasm	0	0
IPI00009629	ST3GAL1	CMP-N-acetylneuraminate-beta-galactosamide-alpha-2,3-sialyltransferase																4					Plasma Membrane	1	0.744
IPI00009633	CTDSP1	Carboxy-terminal domain RNA polymerase II polypeptide A small phosphatase 1																1					Nucleus	0	0
IPI00009634	SQRDL	Sulfide:quinone oxidoreductase, mitochondrial precursor	1					6					4					11	1		0.289864		Cytoplasm	0	0.777
IPI00009659	C20orf77	Protein C20orf77	6					3					4					1					Unknown	0	0.004	Yes
IPI00009668	CENPH	Centromere protein H	2																				Nucleus	0	0
IPI00009680	MRPL44	39S ribosomal protein L44, mitochondrial precursor	12					7										3		2		0.968927	Cytoplasm	0	0.263
IPI00009688	PIP5K2A	Phosphatidylinositol-4-phosphate 5-kinase type II alpha						2					1					1					Cytoplasm	0	0.009
IPI00009702	CCDC21	Hypothetical protein FLJ13976											1										Unknown	0	0
IPI00009703	SOX2	Transcription factor SOX-2	1																				Nucleus	0	0
IPI00009720	LIF	Leukemia inhibitory factor precursor												1		8.42537							Extracellular Space	0	0.999
IPI00009726	NMNAT1	Nicotinamide mononucleotide adenylyltransferase 1	10										2										Nucleus	0	0.001
IPI00009730	MID1IP1	Mid1-interacting protein 1						1															Cytoplasm	0	0
IPI00009737	RRAGD	OTTHUMP00000016853	2																				Cytoplasm	0	0
IPI00009744	ALDH3B2	Aldehyde dehydrogenase 3B2						3															Unknown	0	0.068
IPI00009747	LSS	Lanosterol synthase	30	2	2	0.24051	0.396997	4															Cytoplasm	0	0
IPI00009755	METTL3	Splice Isoform 1 of N6-adenosine-methyltransferase 70 kDa subunit											1										Nucleus	0	0
IPI00009771	LMNB2	Lamin B2	19					2					29	3	3	0.775871	0.285781	71	3	4	0.117154	0.0937696	Nucleus	0	0.468	Yes
IPI00009772	BET1L	GS15	5					2															Plasma Membrane	1	0
IPI00009790	PFKP	6-phosphofructokinase type C	13	13	25	3.06876	10.1669	33		26		2.07207	131	3	38	0.176334	0.73432		2	5	5.95675	8.18927	Cytoplasm	0	0.001
IPI00009794	SDF4	Calcium binding protein Cab45	3	21		17.1965		3	20		25.1317		2	9	1	22.6095	1.17483	5	3		1.40585		Plasma Membrane	1	0.999	Yes
IPI00009817	CHCHD8	E2IG2	5					1					11	1		0.702114		9	1		0.347837		Unknown	0	0.001
IPI00009822	SRP54	Signal recognition particle 54 kDa protein	6	2		1.06511		5					9										Cytoplasm	0	0.002
IPI00009841	EWSR1	Splice Isoform EWS of RNA-binding protein EWS	2	10		11.093		8		1		0.407908	27	2		0.566098		37	3	2	0.221977	0.101992	Nucleus	0	0.001
IPI00009844	GMPR2	GMP reductase 2	11	2		0.621317							1										Unknown	0	0
IPI00009855	SLC15A3	Solute carrier family 15, member 3																		1		2.43785	Plasma Membrane	12	0.18
IPI00009856	PLUNC	Protein Plunc precursor		1		4.2279																	Extracellular Space	0	0.99
IPI00009865	KRT10	Keratin, type I cytoskeletal 10	38	75	135	6.23314	19.5953	60	17	164	1.40324	7.1979	18	4	61	1.61587	8.15755	105	40	410	0.944669	5.57094	Cytoplasm	0	0.001	Yes
IPI00009866	KRT13	Splice Isoform 1 of Keratin, type I cytoskeletal 13						20															Cytoplasm	0	0.099	Yes
IPI00009867	KRT5	Keratin, type II cytoskeletal 5	34	22	16	2.05754	2.61301	4							7		18.6714	15		128		11.5653	Cytoplasm	0	0.194	Yes
IPI00009885	FKBP11	FK506-binding protein 11 precursor											2										Plasma Membrane	1	1
IPI00009895	ZDHHC3	Splice Isoform 1 of Palmitoyltransferase ZDHHC3																		1		2.43785	Plasma Membrane	4	0	Yes
IPI00009896	EPHX1	Epoxide hydrolase 1	33	16	2	1.54842	0.361968	18		7		1.03675						2	4	13	3.63783	6.56403	Cytoplasm	0	0.194
IPI00009901	NUTF2	Nuclear transport factor 2	44	8		0.596071		9	4		2.09054		7	2		1.98134		2	3		2.81171		Nucleus	0	0	Yes
IPI00009904	PDIA4	Protein disulfide-isomerase A4 precursor	228	39	18	0.554096	0.448744	127	26	12	1.01863	0.258235	106	1	7	0.0787418	0.174499	153	24	98	0.392733	0.921491	Plasma Membrane	1	1	Yes
IPI00009906	ARMCX3	ALEX3 protein variant	1					2										2					Plasma Membrane	1	0.807
IPI00009910	TLR8	Toll-like receptor 8 precursor																1					Plasma Membrane	1	0.927
IPI00009917	LAS1L	Splice Isoform 3 of LAS1-like protein											1										Nucleus	0	0.1
IPI00009920	C6	Complement component C6 precursor													2		6.04896						Extracellular Space	0	0.976	Yes
IPI00009922	C14orf156	DC50	7	3	2	1.33546	1.53836	4		7		3.93964	14		8		1.41306	11	2	7	0.496395	0.922081	Cytoplasm	0	0.045
IPI00009923	P4HA1	Splice Isoform 1 of Prolyl 4-hydroxylase alpha-1 subunit precursor	29	17	5	1.86248	0.975577	16		2		0.373079	20					23					Extracellular Space	0	0.998
IPI00009931	HDHD3	Haloacid dehalogenase-like hydrolase domain containing 3	5					2										2					Unknown	0	0.001
IPI00009943	TPT1	Tumor protein, translationally-controlled 1	14	3	1	0.712247	0.443564	14	1	2	0.398423	0.422823	16	1		0.49561		3	3		2.10878		Cytoplasm	0	0
IPI00009946	TOMM34	Mitochondrial import receptor subunit TOM34	8					5		2		1.05706	45	1	3	0.18316	0.186379	2					Cytoplasm	0	0
IPI00009949	PSMF1	Proteasome inhibitor PI31 subunit						3					7					1					Cytoplasm	0	0.635
IPI00009950	LMAN2	Vesicular integral-membrane protein VIP36 precursor	40	18		1.44152		62	20	8	1.59566	0.355069	7	1		1.05317		28	15	11	1.3164	0.579876	Plasma Membrane	1	0.995	Yes
IPI00009958	COPS5	COP9 signalosome complex subunit 5	7	4		1.73895																	Nucleus	0	0
IPI00009960	IMMT	Splice Isoform 1 of Mitochondrial inner membrane protein		1		4.2279		9					10		6		1.4679	14	1	14	0.231892	1.40866	Cytoplasm	0	0.268	Yes
IPI00009976	TMED1	Putative T1/ST2 receptor binding protein precursor	1	1		2.11395												2	2		1.98558		Plasma Membrane	1	1
IPI00009982	TDRKH	Splice Isoform 1 of Tudor and KH domain-containing protein						1															Plasma Membrane	1	0.22
IPI00009997	B3GNT1	N-acetyllactosaminide beta-1,3-N-acetylglucosaminyltransferase		11		36.5069			8		40.8107		3	5		9.53172							Plasma Membrane	1	0.861	Yes
IPI00010067	SRPK3	Splice Isoform 1 of Serine/threonine-protein kinase 23	1																				Cytoplasm	0	0.002
IPI00010080	OXSR1	Serine/threonine-protein kinase OSR1	6	2		1.06511		1					7		2		0.75612						Nucleus	0	0
IPI00010090	GCLM	Glutamate--cysteine ligase regulatory subunit	3	1		1.05697		7	2		1.36908		3					1					Cytoplasm	0	0.008
IPI00010105	EIF6	Eukaryotic translation initiation factor 6	50	17	14	1.09557	1.57154	9					44	2	18	0.352239	1.03201	14	11	3	1.88414	0.354237	Cytoplasm	0	0
IPI00010120	CTBP2	C-terminal binding protein 2	14	1		0.28186		3										3					Nucleus	0	0
IPI00010130	GLUL	Glutamine synthetase	3										2					9	1		0.347837		Cytoplasm	0	0	Yes
IPI00010133	CORO1A	Coronin-1A	5															64	25	12	0.968605	0.280835	Cytoplasm	0	0	Yes
IPI00010140	TLR9	Splice Isoform 1 of Toll-like receptor 9 precursor											1										Plasma Membrane	1	0.959
IPI00010141	POLE3	DNA polymerase epsilon subunit 3	2					2					2										Nucleus	0	0	Yes
IPI00010142	UBE2G2	Ubiquitin-conjugating enzyme E2 G2	3					1					2					1					Cytoplasm	0	0
IPI00010153	RPL23	60S ribosomal protein L23	8	7		2.6217		15		15		2.56672	25	3	12	0.895235	1.20361	19					Cytoplasm	0	0.645	Yes
IPI00010154	GDI1	Rab GDP dissociation inhibitor alpha	88	28	3	1.02675	0.201802	90	23	26	1.26874	0.77418	55	12	8	1.60901	0.378497	21	11		1.28464		Cytoplasm	0	0.002	Yes
IPI00010157	MAT2A	S-adenosylmethionine synthetase gamma form	24	2	1	0.298232	0.266138	16		1		0.215951	15		1		0.22028	7	5	2	1.67398	0.484463	Cytoplasm	0	0
IPI00010158	CHRAC1	Chromatin accessibility complex protein 1	3																				Nucleus	0	0
IPI00010180	CES1	Liver carboxylesterase 1 precursor																18		2		0.203985	Extracellular Space	0	1
IPI00010182	DBI	DBI protein	17	27		4.8974		26	17		3.17029		22	12		3.91759		16	12		1.80826		Cytoplasm	0	0	Yes
IPI00010187	ELOVL1	Elongation of very long chain fatty acids protein 1																		1		2.43785	Plasma Membrane	7	0.001	Yes
IPI00010204	SFRS3	Splicing factor, arginine/serine-rich 3	2	3	3	3.56123	5.98679	9		3		0.901351	12	6	5	3.50402	1.04788	8	9	16	2.58948	2.6673	Nucleus	0	0
IPI00010207	UFM1	Ubiquitin-fold modifier 1 precursor	8	3		1.18708		3					2					1	1		1.73919		Unknown	0	0	Yes
IPI00010214	S100A14	S100 calcium-binding protein A14	3					18	1		0.314544									6		9.62712	Cytoplasm	0	0	Yes
IPI00010218	CYP20A1	Cytochrome P450 monooxygenase	1	1		2.11395																	Plasma Membrane	1	0.919
IPI00010240	MIF4GD	AD023																		3		5.31356	Unknown	0	0
IPI00010241	WAC	WW domain-containing adapter with a coiled-coil region, isoform 1	4					2					5										Unknown	0	0
IPI00010244	MRPS11	Splice Isoform 1 of 28S ribosomal protein S11, mitochondrial precursor						5		4		1.94745	9		3		0.857344	4					Cytoplasm	0	0.079
IPI00010252	TRIM33	Splice Isoform Alpha of Transcription intermediary factor 1-gamma											1										Nucleus	0	0.001
IPI00010255	RHBDD2	NPD007								1		3.67117								2		3.87571	Plasma Membrane	4	0.043
IPI00010270	RAC2	Ras-related C3 botulinum toxin substrate 2													1		3.52448	1					Cytoplasm	0	0.02
IPI00010271	RAC1	Splice Isoform A of Ras-related C3 botulinum toxin substrate 1	43	9		0.682979		15					26		1		0.130536	1					Cytoplasm	0	0.02
IPI00010277	TNFRSF12A	Splice Isoform 1 of Tumor necrosis factor receptor superfamily member Fn14 precursor		4		13.9116			3		15.929			9		67.8284			2		5.95675		Plasma Membrane	2	1	Yes
IPI00010278	MRPS30	Mitochondrial 28S ribosomal protein S30	8	2		0.828422							2										Extracellular Space	0	0.952
IPI00010279	MIR16	Membrane interacting protein of RGS16																		1		2.43785	Plasma Membrane	1	0.963
IPI00010295	CPN1	Carboxypeptidase N catalytic chain precursor													1		3.52448						Extracellular Space	0	0.995	Yes
IPI00010308	C5AR1	C5a anaphylatoxin chemotactic receptor																		2		3.87571	Plasma Membrane	7	0
IPI00010314	ALAD	Delta-aminolevulinic acid dehydratase	1										3										Cytoplasm	0	0.039	Yes
IPI00010320	CBX1	Chromobox protein homolog 1	19	20	6	3.2779	1.74604	14	12	1	4.04774	0.244745	10		1		0.320407	29	11		0.94207		Nucleus	0	0	Yes
IPI00010331	SIRT5	Splice Isoform 2 of NAD-dependent deacetylase sirtuin-5	10					1					2					2					Cytoplasm	0	0.014
IPI00010333	MDK	Midkine precursor		28	4	91.3812	23.6138		16		80.6214		14	9	5	4.52189	0.90816		10		25.7837		Plasma Membrane	1	1
IPI00010334	PLCL2	Similar to Phospholipase C-like 2																1					Cytoplasm	0	0
IPI00010338	F3	Tissue factor precursor			1		6.65346	1		10		13.8558											Plasma Membrane	1	0.993	Yes
IPI00010346	NLN	Neurolysin, mitochondrial precursor	5	3	1	1.78062	1.10891	3					1	1		4.21269							Cytoplasm	0	0.361
IPI00010348	DNASE2	Deoxyribonuclease II alpha precursor	3	1		1.05697		2	6		10.286		1					3					Extracellular Space	0	1
IPI00010349	AGPS	Alkyldihydroxyacetonephosphate synthase, peroxisomal precursor	21	3	2	0.485623	0.559405	1		1		1.83558			1		3.52448	11		7		0.922081	Cytoplasm	0	0.805	Yes
IPI00010351	MSR1	Splice Isoform I of Macrophage scavenger receptor types I and II																3	1	4	0.869593	1.68785	Plasma Membrane	1	0	Yes
IPI00010360	COL4A3	Splice Isoform 1 of Collagen alpha 3(IV) chain precursor	2																				Extracellular Space	0	1
IPI00010362	HLA-E	Lymphocyte antigen							10		50.7634							54	19		0.874347		Plasma Membrane	1	0.999	Yes
IPI00010400	PLCB3	1-phosphatidylinositol-4,5-bisphosphate phosphodiesterase beta 3	9	2		0.74558		17	1		0.332019		5		3		1.42891	5		2		0.645951	Cytoplasm	0	0.004	Yes
IPI00010402	SH3BGRL3	Hypothetical protein	16	7		1.38796		10	5		2.35288		12	4	1	2.36165	0.271114	21	6		0.721374		Nucleus	0	0	Yes
IPI00010404	SF3B5	Splicing factor 3B subunit 5	11	2	2	0.621317	1.02558	8		2		0.704704	12	1		0.648106		3	1		0.869593		Nucleus	0	0
IPI00010414	PDLIM1	PDZ and LIM domain protein 1	16	8		1.57784		41	15		1.80107		47	4		0.639614		21	11	6	1.28464	0.437596	Cytoplasm	0	0	Yes
IPI00010415	ACOT7	Splice Isoform 1 of Cytosolic acyl coenzyme A thioester hydrolase	13		2		0.879066	6					5		1		0.587414						Cytoplasm	0	0.301
IPI00010418	MYO1C	Myosin Ic		1		4.2279		12		8		1.72072	4										Cytoplasm	0	0
IPI00010420	SLC25A31	Hypothetical protein DKFZp434N1235												2		15.8507							Plasma Membrane	2	0.045
IPI00010426	FOXJ3	Similar to Transcription factor BF-1	1																				Nucleus	0	0.004
IPI00010427	TMEM93	Hypothetical protein MGC2963																		2		3.87571	Plasma Membrane	2	0
IPI00010428	CDCA3	C8	7					8					2										Unknown	0	0
IPI00010438	SNAP23	Splice Isoform SNAP-23a of Synaptosomal-associated protein 23	21					19					13		3		0.612389	5		23		5.67844	Plasma Membrane	0	0
IPI00010460	AIP	AH receptor-interacting protein	13					12					10					2					Nucleus	0	0
IPI00010463	GTPBP1	GTP binding protein 1						4							1		3.52448						Cytoplasm	0	0.012	Yes
IPI00010467	TP53INP2	Tumor protein p53 inducible nuclear protein 2											1		1		1.76224						Nucleus	0	0.042
IPI00010470	SNAP25	Splice Isoform SNAP-25b of Synaptosomal-associated protein 25						1															Plasma Membrane	0	0
IPI00010471	LCP1	L-plastin	15	6	3	1.27296	1.12252	9										40	4	25	0.266183	0.90113	Cytoplasm	0	0	Yes
IPI00010477	LGALS9	Splice Isoform Long of Galectin-9																1	1		1.73919		Extracellular Space	0	0.067
IPI00010490	ARVCF	Splice Isoform Long of Armadillo repeat protein deleted in velo-cardio-facial syndrome						1															Plasma Membrane	0	0.001	Yes
IPI00010544	TJAP1	Splice Isoform 1 of Tight junction-associated protein 1											2										Plasma Membrane	0	0	Yes
IPI00010653	REXO4	Splice Isoform 1 of RNA exonuclease 4											1										Nucleus	0	0	Yes
IPI00010676	PLAUR	Splice Isoform 1 of Urokinase plasminogen activator surface receptor precursor		5		17.1395			5		25.8817		9	13	16	9.75299	4.13917	3	27	20	16.979	7.43927	Extracellular Space	0	1	Yes
IPI00010697	ITGA6	Splice Isoform Alpha-6X1X2B of Integrin alpha-6 precursor	5		3		2.9934			9		25.0405	25		100		9.74801			12		18.2542	Plasma Membrane	1	0.999
IPI00010700	BAT2	Splice Isoform 1 of Large proline-rich protein BAT2		1	1	4.2279	6.65346	13					26		5		0.504534	9		1		0.243785	Unknown	0	0
IPI00010706	GSS	Glutathione synthetase	14		2		0.820461	5	4		3.48423		18	1		0.443441			2		5.95675		Cytoplasm	0	0	Yes
IPI00010717	MVK	Mevalonate kinase	1																				Cytoplasm	0	0.062
IPI00010720	CCT5	T-complex protein 1, epsilon subunit	121	14	3	0.378611	0.147216	79	9	3	0.572338	0.112669	94	5	8	0.401335	0.223114	15	5		0.836991		Cytoplasm	0	0
IPI00010740	SFPQ	Splice Isoform Long of Splicing factor, proline-and glutamine-rich	34	17	2	1.59641	0.351626	16	3	10	0.937001	1.6301	47	9	13	1.41309	0.704547	59	12	10	0.512341	0.256309	Nucleus	0	0	Yes
IPI00010746	PTDSS1	Phosphatidylserine synthase 1								1		3.67117								3		5.31356	Plasma Membrane	9	0
IPI00010756	HOXC8	Homeobox protein Hox-C8													3		8.57344						Nucleus	0	0
IPI00010779	TPM4	Tropomyosin 4	49	12	12	0.794696	1.37683	30	6	5	0.99542	0.463092	57	4	1	0.529336	0.0607669	32	8	1	0.631121	0.0738744	Cytoplasm	0	0	Yes
IPI00010790	BGN	Biglycan precursor												5		38.1269							Extracellular Space	0	0.998	Yes
IPI00010796	P4HB	Protein disulfide-isomerase precursor	145	27	48	0.60379	1.86552	309	56	50	0.902177	0.43406	81	3	6	0.283855	0.196913	140	12	40	0.218018	0.414994	Extracellular Space	0	1	Yes
IPI00010807	FZD8	Frizzled 8 precursor	3	1		1.05697																	Plasma Membrane	7	0.999	Yes
IPI00010810	ETFA	Electron transfer flavoprotein alpha-subunit, mitochondrial precursor	26	1		0.156589		33		2		0.186539	13					39	2		0.148919		Cytoplasm	0	0.658	Yes
IPI00010833	ZNF148	Zinc finger protein 148						1										2					Nucleus	0	0
IPI00010845	NDUFS8	NADH-ubiquinone oxidoreductase 23 kDa subunit, mitochondrial precursor	1							1		3.67117	2		3		2.85781	1					Extracellular Space	0	0.994
IPI00010851	CD72	B-cell differentiation antigen CD72																		5		8.18927	Plasma Membrane	1	0
IPI00010853	KIAA1446	Brain-enriched guanylate kinase-associated protein											1										Nucleus	0	0	Yes
IPI00010860	PSMD9	Splice Isoform p27-L of 26S proteasome non-ATPase regulatory subunit 9	7	10		4.15987		8	7		3.9816		10	2		1.44098		7	2		0.744593		Cytoplasm	0	0	Yes
IPI00010863	ATOX1	Similar to Copper transport protein ATOX1	7	8		3.3529		5	2		1.82545		14	6		3.03682		1	1		1.73919		Cytoplasm	0	0.006
IPI00010865	CSNK2B	Casein kinase II beta subunit	5	1		0.70465		2					5					3					Unknown	0	0.02
IPI00010882	DFFA	Splice Isoform DFF45 of DNA fragmentation factor alpha subunit	17	8		1.49018		5	1		0.996056		11						1		3.47837		Nucleus	0	0
IPI00010890	RFXAP	Regulatory factor X-associated protein											2										Nucleus	0	0.817
IPI00010896	DDAH2	Chloride intracellular channel protein 1	52	10	2	0.627906	0.232206	37	19	11	2.51448	0.799549	57	9	3	1.16945	0.147818	17	11		1.57012		Nucleus	0	0
IPI00010949	SIAE	Sialate O-acetylesterase precursor	2					1		13		17.8626						2					Extracellular Space	0	0.999	Yes
IPI00010951	EPPK1	Epiplakin	12	7	15	1.81502	6.60015	12	5	4	1.9909	0.898821	9					44	5		0.297597		Cytoplasm	0	0.149	Yes
IPI00011032	TBC1D22A	Splice Isoform 1 of TBC1 domain family member 22A								1		3.67117											Unknown	0	0
IPI00011036	INHBE	Inhibin beta E chain precursor												1		8.42537							Extracellular Space	0	1	Yes
IPI00011077	MRPL32	39S ribosomal protein L32, mitochondrial precursor						1					10					3					Extracellular Space	0	0.999
IPI00011084	CLDN6	Claudin-6	3	3		2.67092														6		9.62712	Plasma Membrane	5	0.997
IPI00011088	CLDN12	Claudin-12		1		4.2279																	Plasma Membrane	4	0.72
IPI00011090	FKSG44	FKSG44 protein						1															Unknown	0	0	Yes
IPI00011102	CSNK1D	Splice Isoform 1 of Casein kinase I, delta isoform								3		9.01351											Cytoplasm	0	0
IPI00011107	IDH2	Isocitrate dehydrogenase [NADP], mitochondrial precursor	9	2		0.74558		29					7					38	11		0.724669		Cytoplasm	0	0.429	Yes
IPI00011115	KLF16	Transcription factor BTEB4											1		6		8.07344						Nucleus	0	0.254
IPI00011118	RRM2	Ribonucleoside-diphosphate reductase M2 subunit	14	2		0.497053		5															Extracellular Space	0	0.989
IPI00011126	PSMC1	26S protease regulatory subunit 4	20	3		0.508748		32	1	4	0.181101	0.354081	25		1		0.135557	1	1		1.73919		Nucleus	0	0
IPI00011138	UPF3A	Splice Isoform 1 of Regulator of nonsense transcripts 3A											1										Nucleus	0	0.003
IPI00011140	NOV	NOV protein homolog precursor		5		17.1395			5		25.8817			1	5	8.42537	13.6224		11		28.2621		Extracellular Space	0	0.998	Yes
IPI00011167	TBC1D10A	TBC1 domain family member 10A	1					1					1										Plasma Membrane	0	0.001
IPI00011174	KAL1	Anosmin-1 precursor		2		7.4558									1		3.52448						Extracellular Space	0	1
IPI00011200	PHGDH	D-3-phosphoglycerate dehydrogenase	180	50	49	0.89721	1.53602	127	8	30	0.318834	0.633868	102	7	34	0.514346	0.843033	14	11	3	1.88414	0.354237	Cytoplasm	0	0
IPI00011201	ME2	NAD-dependent malic enzyme, mitochondrial precursor	9										21					14	3	8	0.562341	0.833522	Cytoplasm	0	0.144
IPI00011217	NDUFS4	NADH-ubiquinone oxidoreductase 18 kDa subunit, mitochondrial precursor			1		6.65346	1							2		6.04896	2					Extracellular Space	0	0.967
IPI00011229	CTSD	Cathepsin D precursor	59	10	7	0.55465	0.676237	58	51	23	4.31853	1.05825	2		3		2.85781	157	90	78	1.41806	0.716156	Extracellular Space	0	1	Yes
IPI00011250	UCHL3	Ubiquitin carboxyl-terminal hydrolase isozyme L3	12	4		1.07012		10					12	1	1	0.648106	0.271114	1					Cytoplasm	0	0
IPI00011253	RPS3	40S ribosomal protein S3	64	7	9	0.363005	0.798171	29		61		5.46471	93	2	14	0.168625	0.386625	39	7	17	0.458715	0.636088	Cytoplasm	0	0	Yes
IPI00011261	C8G	Complement component C8 gamma chain precursor			1		6.65346			3		9.01351			21		54.0141		4	7	10.9135	11.065	Extracellular Space	0	1	Yes
IPI00011262	MATN1	Cartilage matrix protein precursor											1										Extracellular Space	0	1
IPI00011268	RALY	RNA binding protein	5					7					11					29	1		0.115946		Nucleus	0	0
IPI00011274	HNRPDL	JKTBP2	16		2		0.723936	10					43	5		0.86652		44	2	24	0.132372	0.789077	Nucleus	0	0.814
IPI00011276	BCKDHB	2-oxoisovalerate dehydrogenase beta subunit, mitochondrial precursor	3	1	1	1.05697	1.66336	1															Extracellular Space	0	0.994
IPI00011284	COMT	Catechol O-methyltransferase	27	7	2	0.842689	0.439533	25		15		1.57952	17		4		0.616551	10	4	4	0.992136	0.613765	Plasma Membrane	1	0.668
IPI00011285	CAPN1	Calpain-1 catalytic subunit	113	38	27	1.08474	1.34775	33		13		1.05074	12		10		2.01883	8	14	52	3.96636	8.41871	Cytoplasm	0	0.012
IPI00011290	SULT1C2	Splice Isoform Short of Sulfotransferase 1C1		7		23.5953																	Cytoplasm	0	0
IPI00011302	CD59	CD59 glycoprotein precursor	12	9		2.31162		1	1	1	2.98817	1.83558	15	7	17	3.3111	2.74476	2		6		3.20904	Extracellular Space	0	0.997	Yes
IPI00011307	MTHFD2	Methylene tetrahydrofolate dehydrogenase 2 precursor; NAD-dependent Methylene tetrahydrofolate dehydrogenase cyclohydrolase	8		1		0.739273	11		2		0.528528	2					5					Extracellular Space	0	0.991
IPI00011374	FAM76A	Hypothetical protein																1					Unknown	0	0.001	Yes
IPI00011416	ECH1	Delta3,5-delta2,4-dienoyl-CoA isomerase, mitochondrial precursor	158	86	55	1.7522	1.96189	76		30		1.0537						48	8	27	0.42504	0.812695	Cytoplasm	0	0.164
IPI00011421	MLLT11	Protein AF1q						7		7		2.46227											Unknown	0	0.001
IPI00011454	GANAB	Splice Isoform 2 of Neutral alpha-glucosidase AB precursor	445	142	43	1.02996	0.547307	184	38	29	1.02757	0.424129	111	9	27	0.60561	0.617509	90	5	5	0.147163	0.089992	Plasma Membrane	1	0.996
IPI00011461	STRN3	Splice Isoform Beta of Striatin-3													8		21.1959	3					Nucleus	0	0.003
IPI00011488	STK4	Serine/threonine-protein kinase 4	2										1					2					Cytoplasm	0	0
IPI00011511	CECR5	Splice Isoform 2 of Cat eye syndrome critical region protein 5 precursor	3					17					3										Extracellular Space	0	0.994	Yes
IPI00011515	PACSIN1	Protein kinase C and casein kinase substrate in neurons protein 1						1															Cytoplasm	0	0
IPI00011522	ACAA1	Homo sapiens clone 23623	5					2										21		1		0.110812	Cytoplasm	0	0.915
IPI00011527	CTD-2248C21.2	GAGE-2 protein	3	2		1.86395																	Unknown	0	0
IPI00011528	CSTF1	Cleavage stimulation factor, 50 kDa subunit	2															2					Nucleus	0	0.001	Yes
IPI00011529	GAGE3	GAGE-3 protein	2																				Unknown	0	0
IPI00011531	GAGE5	GAGE-5 protein	2																				Unknown	0	0
IPI00011545	GAGE6	GAGE-6 protein	2																				Unknown	0	0
IPI00011564	SDC4	Syndecan-4 precursor		2		7.4558			2		10.9527								12	8	30.7405	12.5028	Plasma Membrane	1	1	Yes
IPI00011569	ACACA	Acetyl-CoA carboxylase 1	4		4		4.72277			6		17.027	3										Cytoplasm	0	0	Yes
IPI00011578	NPTN	Stromal cell-derived receptor-1 alpha	14	6	2	1.35783	0.820461	1										7	2		0.744593		Plasma Membrane	1	1
IPI00011590	FOSL1	Fos-related antigen 1											6		10		3.74926						Nucleus	0	0
IPI00011592	DYNC1LI2	Dynein light intermediate chain 2, cytosolic	32					9					12					6					Cytoplasm	0	0.052
IPI00011603	PSMD3	26S proteasome non-ATPase regulatory subunit 3	1	3		5.34185		14		2		0.422823	21	1	7	0.382972	0.848699	3					Cytoplasm	0	0	Yes
IPI00011604	LOC730107	Glycine cleavage system H protein, mitochondrial precursor	4					3					4					6					Extracellular Space	0	0.975
IPI00011609	UBE3A	Splice Isoform II of Ubiquitin-protein ligase E3A											3	1		2.10634							Nucleus	0	0
IPI00011618	RBM9	RNA binding motif protein 9 isoform 2		1		4.2279							2										Nucleus	0	0
IPI00011619	PAPSS1	Bifunctional 3'-phosphoadenosine 5'-phosphosulfate synthethase 1	34	1		0.120797		9										6					Cytoplasm	0	0
IPI00011631	ZW10	Centromere/kinetochore protein zw10 homolog																		1		2.43785	Nucleus	0	0
IPI00011635	BCL2L13	Splice Isoform 2 of Bcl-2-like 13 protein						13	1		0.426881							1		1		1.21893	Plasma Membrane	1	0.005	Yes
IPI00011643	SPINT1	Splice Isoform 2 of Kunitz-type protease inhibitor 1 precursor	3	26		21.2313												1	5	19	6.69593	14.1596	Plasma Membrane	2	1
IPI00011651	PTPRG	Receptor-type tyrosine-protein phosphatase gamma precursor		3		10.6837									1		3.52448						Plasma Membrane	1	0.821	Yes
IPI00011654	TUBB	Tubulin beta-2 chain	441	211	297	1.54318	3.80108	555	59	243	0.529863	1.16923	481	60	205	0.926395	1.07576	105	54	73	1.272	0.999654	Cytoplasm	0	0	Yes
IPI00011662	SPINT2	Kunitz-type protease inhibitor 2 precursor	31	26		2.65392		6	1	1	0.853763	0.524453						4		2		0.775141	Plasma Membrane	1	0.999	Yes
IPI00011675	SP100	Splice Isoform Sp100-HMG of Nuclear autoantigen Sp-100	4					2		1		1.22372	11					1					Nucleus	0	0
IPI00011676	WASL	Neural Wiskott-Aldrich syndrome protein	14					10					3										Cytoplasm	0	0.005
IPI00011694	PRSS1	Trypsin I precursor		20		65.558												5	1	25	0.579729	6.15772	Extracellular Space	0	0.999	Yes
IPI00011695	PRSS2	Protease serine 2 isoform B		51	8	165.623	46.2277											5	1		0.579729		Extracellular Space	0	0.008	Yes
IPI00011698	SAP18	Sin3 associated polypeptide p18	6					4		6		3.4054	3										Nucleus	0	0
IPI00011726	RTCD1	Splice Isoform 1 of RNA 3'-terminal phosphate cyclase	1										3										Nucleus	0	0.011	Yes
IPI00011756	MEIS1	Homeobox protein Meis1	11																				Nucleus	0	0
IPI00011757	ELL2	RNA polymerase II elongation factor ELL2																		1		2.43785	Nucleus	0	0	Yes
IPI00011770	NDUFA4	NADH-ubiquinone oxidoreductase MLRQ subunit	4		3		3.59208			1		3.67117	4		2		1.20979			2		3.87571	Plasma Membrane	1	0.763
IPI00011832	SPP2	Secreted phosphoprotein 24 precursor		1		4.2279																	Extracellular Space	0	0.911	Yes
IPI00011865	PDGFD	Iris-expressed growth factor short form													1		3.52448						Extracellular Space	0	0.981
IPI00011875	IK	Red protein	10					3					2					3					Extracellular Space	0	0	Yes
IPI00011876	MTAP	S-methyl-5-thioadenosine phosphorylase	31	7		0.737353		11	1		0.498028		29	3	1	0.775871	0.117483	1	1		1.73919		Nucleus	0	0.01
IPI00011891	PRKAA1	5'-AMP-activated protein kinase, catalytic alpha-1 chain	1	2		3.7279		1					2										Cytoplasm	0	0
IPI00011913	HNRPA0	Heterogeneous nuclear ribonucleoprotein A0	8	8		2.98036		20		2		0.302016	41	2	1	0.377399	0.0839162	44	5	2	0.297597	0.0861268	Nucleus	0	0.01	Yes
IPI00011916	JTV1	Multisynthetase complex auxiliary component p38	9					5		1		0.611862	7					1					Plasma Membrane	0	0
IPI00011919	FADD	FADD protein	3					1					15	4		1.91884							Cytoplasm	0	0.886
IPI00011937	PRDX4	Peroxiredoxin 4	19	4	13	0.69558	3.72475	29	1	4	0.199211	0.389489	30	4	5	0.990371	0.439432	31	2	4	0.186148	0.210982	Extracellular Space	0	0.999
IPI00011951	KIAA0427	Splice Isoform 2 of Protein KIAA0427	2																				Unknown	0	0.011	Yes
IPI00011961	SIGLEC1	Splice Isoform 1 of Sialoadhesin precursor																14	5	35	0.892791	3.42166	Plasma Membrane	1	1
IPI00011996	UBE2Z	Ubiquitin-conjugating enzymes domain containing protein	7					4										1					Unknown	0	0
IPI00011997	C8orf33	Hypothetical protein FLJ20989	3										1		1		1.76224						Unknown	0	0.173
IPI00012007	AHCY	Adenosylhomocysteinase	146	48	53	1.06081	2.04512	35	3	12	0.442473	0.918168	54		28		1.30337	22	22	32	2.4141	2.04397	Cytoplasm	0	0.001	Yes
IPI00012009	CSF2RA	Splice Isoform 1 of Granulocyte-macrophage colony-stimulating factor receptor alpha chain precursor																		1		2.43785	Plasma Membrane	1	0.996	Yes
IPI00012011	CFL1	Cofilin, non-muscle isoform	184	82	54	1.43615	1.6556	75	31	23	2.04298	0.821538	119	45	33	2.79285	0.702566	143	69	35	1.1945	0.356423	Nucleus	0	0	Yes
IPI00012024	HTN1	Histatin-1 precursor								1		3.67117											Extracellular Space	0	1	Yes
IPI00012028	STX17	Syntaxin-17	4																				Plasma Membrane	2	0
IPI00012035	CD46	Splice Isoform A of Membrane cofactor protein precursor	1	1		2.11395		1							7		18.6714			9		13.9407	Plasma Membrane	1	0.846
IPI00012048	NME1	Nucleoside diphosphate kinase A	98	32		1.05346		52	14		1.33337		63		3		0.13396	7	2	3	0.744593	0.664195	Nucleus	0	0	Yes
IPI00012066	PCBP2	Poly(rC)-binding Protein 2 isoform b	114	24	17	0.682344	0.844424	58	1		0.101294		54		7		0.339479	22	7	12	0.797766	0.793663	Nucleus	0	0.001	Yes
IPI00012069	NQO1	NAD(P)H dehydrogenase [quinone] 1	40	10		0.811683		79	4	31	0.261317	1.04758	1					2					Cytoplasm	0	0.028
IPI00012074	HNRPR	Heterogeneous nuclear ribonucleoprotein R	34					18		4		0.614983	38		7		0.478753	35	3	20	0.234309	0.826585	Nucleus	0	0	Yes
IPI00012079	EIF4B	Eukaryotic translation initiation factor 4B	47	5		0.357073		50	3		0.312334		19	3	3	1.16381	0.428672	6					Cytoplasm	0	0.008
IPI00012102	GNS	N-acetylglucosamine-6-sulfatase precursor	8					17	8		2.26726		6	1		1.20362		11					Plasma Membrane	1	0.578
IPI00012136	CACNA1A	Splice Isoform BI-1-GGCAG of Voltage-dependent P/Q-type calcium channel alpha-1A subunit																	1		3.47837		Plasma Membrane	17	0.097	Yes
IPI00012197	XTP3TPA	Hypothetical protein FLJ21190	4					3	1		1.49408		5					4	2		1.19135		Unknown	0	0	Yes
IPI00012198	C1orf50	Chromosome 1 open reading frame 50	2																				Unknown	0	0.001
IPI00012199	CCDC86	Hypothetical protein FLJ22321											10										Unknown	0	0
IPI00012200	C11orf48	MGC2477 protein								2		6.34234	12		1		0.271114						Unknown	0	0.005
IPI00012201	MLPH	Splice Isoform 1 of Melanophilin											1		1		1.76224						Cytoplasm	0	0
IPI00012202	WDR77	Methylosome protein 50	4	1		0.84558							9					2					Nucleus	0	0.134
IPI00012234	UPK3B	Uroplakin-3B precursor	5										1							3		5.31356	Extracellular Space	0	0.994
IPI00012235	NDFIP1	Splice Isoform 1 of NEDD4 family-interacting protein 1																		2		3.87571	Plasma Membrane	3	0.997
IPI00012268	PSMD2	26S proteasome non-ATPase regulatory subunit 2	108	36	14	1.07527	0.735307	75	2	48	0.144114	1.70021	111		60		1.36133	6	7	7	2.62123	1.58071	Cytoplasm	0	0
IPI00012280	TOR1AIP1	Hypothetical protein FLJ10918	8	1		0.469767		4					26		7		0.691532	9	2	18	0.595675	2.68814	Nucleus	0	0
IPI00012283	SEMA3B	Semaphorin-3B precursor		5		17.1395			6		30.858							1	1		1.73919		Plasma Membrane	1	1	Yes
IPI00012301	GPS2	G protein pathway suppressor 2	2																				Nucleus	0	0
IPI00012303	SELENBP1	Selenium-binding protein 1	25	2		0.286762		1										1					Cytoplasm	0	0	Yes
IPI00012313	GOLPH3L	GPP34-related protein						5															Unknown	0	0	Yes
IPI00012315	NME3	Nucleoside diphosphate kinase 3						1										1					Extracellular Space	0	0.996	Yes
IPI00012340	SFRS9	Splicing factor, arginine/serine-rich 9	1	1		2.11395		4					7	2	1	1.98134	0.44056	7	1		0.434797		Nucleus	0	0	Yes
IPI00012341	SFRS5	Splice Isoform SRP40-1 of Splicing factor, arginine/serine-rich 5	2					4					10	2		1.44098		1					Nucleus	0	0
IPI00012345	SFRS6	Splice Isoform SRP55-1 of Splicing factor, arginine/serine-rich 6	2															1					Nucleus	0	0	Yes
IPI00012347	MXRA5	Adlican							1		5.97634												Extracellular Space	0	1
IPI00012353	MRPL3	Mitochondrial 39S ribosomal protein L3	14					7					3					3					Cytoplasm	0	0.581
IPI00012361	NOG	Noggin precursor		2		7.4558																	Extracellular Space	0	0.878	Yes
IPI00012369	MAD2L1	Mitotic spindle assembly checkpoint protein MAD2A	1	1		2.11395																	Nucleus	0	0
IPI00012382	SNRPA	U1 small nuclear ribonucleoprotein A	4		1		1.33069	9	1	1	0.597634	0.367117	7					5					Nucleus	0	0
IPI00012386	COCH	Cochlin precursor								10		27.7117											Extracellular Space	0	1	Yes
IPI00012390	HOXD4	Homeobox protein Hox-D4													1		3.52448						Nucleus	0	0
IPI00012426	SCPEP1	Splice Isoform 1 of Retinoid-inducible serine carboxypeptidase precursor	9	2		0.74558		5		2		1.05706											Extracellular Space	0	0.998
IPI00012429	C9orf5	Splice Isoform 2 of Protein C9orf5													1		3.52448						Plasma Membrane	14	0
IPI00012431	RNF26	RING finger protein 26													1		3.52448						Plasma Membrane	4	0.702
IPI00012433	F8A3	Factor VIII intron 22 protein						2															Unknown	0	0.247
IPI00012440	FUCA2	Plasma alpha-L-fucosidase precursor		14	1	46.1906	6.65346	1	9	4	22.8935	5.84234		1	4	8.42537	11.0979						Extracellular Space	0	0.999	Yes
IPI00012442	G3BP1	Ras-GTPase-activating protein binding protein 1	31	7		0.737353		54	10	2	0.92297	0.115315	36	5	2	1.03046	0.163485	19	5	3	0.669593	0.265678	Nucleus	0	0
IPI00012450	NMI	N-myc-interactor						3										5					Cytoplasm	0	0
IPI00012451	GNB4	Guanine nucleotide-binding protein beta subunit 4																	4		10.9135		Plasma Membrane	0	0
IPI00012462	EIF2A	CDA02	61	4	2	0.224381	0.198499	25					9	3		2.32761		2					Cytoplasm	0	0.016
IPI00012463	TATDN1	TatD DNase domain containing 1	11	2		0.621317		1					1						1		3.47837		Unknown	0	0
IPI00012479	NACAP1	FKSG17																6					Unknown	0	0
IPI00012490	ATP2B4	Splice Isoform XD of Plasma membrane calcium-transporting ATPase 4	44	21	7	1.52858	0.901649			5		14.3558	5		2		1.00816	12	9	80	1.79272	8.92525	Plasma Membrane	8	0	Yes
IPI00012493	RPS20	40S ribosomal protein S20	18	8	20	1.41175	6.00364	5		114		50.9189	22		13		1.47036	2		4		2.25047	Cytoplasm	0	0	Yes
IPI00012497	ADRBK1	Beta-adrenergic receptor kinase 1	2																				Cytoplasm	0	0.005
IPI00012500	BRIP1	Splice Isoform 1 of Fanconi anemia group J protein											2										Nucleus	0	0	Yes
IPI00012503	PSAP	Splice Isoform Sap-mu-0 of Proactivator polypeptide precursor	71	37		1.67267		52	82	13	7.71811	0.67406	12	8		4.64638		61	11	31	0.45584	0.735056	Extracellular Space	0	1	Yes
IPI00012510	EMILIN2	EMILIN-2 precursor																	2		5.95675		Extracellular Space	0	1	Yes
IPI00012512	RRAS2	Ras-related protein R-Ras2	5										4		3		1.71469						Plasma Membrane	0	0.01
IPI00012535	DNAJA1	DnaJ homolog subfamily A member 1	35		4		0.65594	9		5		1.43558	16		10		1.54381	3		12		4.56356	Nucleus	0	0
IPI00012545	TGOLN2	Splice Isoform TGN51 of Trans-Golgi network integral membrane protein 2 precursor	21	6		0.925791							2		3		2.85781						Plasma Membrane	1	1
IPI00012555	FCN1	Ficolin-1 precursor																1					Extracellular Space	0	0.996	Yes
IPI00012567	VEGFA	Vascular endothelial growth factor isoform a precursor		9		30.0511			4		20.9054			2		15.8507			1		3.47837		Extracellular Space	0	0
IPI00012575	PIR	Pirin	9					8	2		1.21696												Nucleus	0	0.036
IPI00012578	KPNA4	Importin alpha-4 subunit	30	8		0.865264		17	2	2	0.608482	0.352352	22		2		0.262998	3		1		0.609463	Nucleus	0	0	Yes
IPI00012585	HEXB	Beta-hexosaminidase beta chain precursor	27	13		1.53438		11	17		7.13314		4	2		3.17015		6					Plasma Membrane	1	0.841	Yes
IPI00012608	RNF5	G16								2		6.34234											Plasma Membrane	2	0
IPI00012645	SPTBN2	Splice Isoform 1 of Spectrin beta chain, brain 2	4	4	1	2.78232	1.33069	3										3					Cytoplasm	0	0	Yes
IPI00012718	ID1	Splice Isoform ID-A of DNA-binding protein inhibitor ID-1	1																				Nucleus	0	0.7
IPI00012726	PABPC4	Splice Isoform 1 of Polyadenylate-binding protein 4	56					48	4		0.42664		33					17					Cytoplasm	0	0.047	Yes
IPI00012728	ACSL1	Splice Isoform 1 of Long-chain-fatty-acid--CoA ligase 1								1		3.67117								1		2.43785	Plasma Membrane	1	0.002
IPI00012750	RPS25	40S ribosomal protein S25		1	13	4.2279	74.495	6		5		2.05084	12	2	7	1.21929	1.43626	3		2		0.968927	Cytoplasm	0	0	Yes
IPI00012756	IFIT5	Interferon-induced protein with tetratricopeptide repeats 5											2										Unknown	0	0
IPI00012772	RPL8	60S ribosomal protein L8	2	4		4.6372		10		6		1.54791	51	3	11	0.447618	0.553256	13	2		0.425482		Cytoplasm	0	0	Yes
IPI00012773	MTA1	Splice Isoform Long of Metastasis-associated protein MTA1	11					3					3					2					Nucleus	0	0	Yes
IPI00012788	CD3EAP	CD3e-associated protein											9					1					Nucleus	0	0
IPI00012792	CDH5	Vascular endothelial-cadherin precursor								1		3.67117			5		13.6224						Plasma Membrane	2	0.999	Yes
IPI00012795	EIF3S2	Eukaryotic translation initiation factor 3 subunit 2	24					5					35					1					Cytoplasm	0	0
IPI00012831	HBXIP	Hepatitis B virus x-interacting protein	2		2		4.10231	1					5					18	2		0.313513		Cytoplasm	0	0	Yes
IPI00012832	MFAP5	Microfibrillar-associated protein 5 precursor							9		45.787												Extracellular Space	0	0.973	Yes
IPI00012833	PPP4C	Serine/threonine protein phosphatase 4 catalytic subunit	5							2		6.34234											Cytoplasm	0	0
IPI00012835	CTBP1	C-terminal binding protein 1	9					11					2					6					Nucleus	0	0
IPI00012837	KIF5B	Kinesin heavy chain	47	19		1.29854		48					48		6		0.329528	11					Cytoplasm	0	0	Yes
IPI00012857	KCNQ3	Potassium voltage-gated channel subfamily KQT member 3											1										Plasma Membrane	5	0.038
IPI00012870	AKT2	RAC-beta serine/threonine-protein kinase	6	6		2.90963																	Cytoplasm	0	0
IPI00012885	PTK2	Splice Isoform 1 of Focal adhesion kinase 1																		4		6.75141	Cytoplasm	0	0	Yes
IPI00012887	CTSL1	Cathepsin L precursor	4	4		2.78232		2					4	1	2	1.68507	1.20979	16	16	2	2.39141	0.227983	Extracellular Space	0	0.999	Yes
IPI00012912	CPT2	Carnitine O-palmitoyltransferase II, mitochondrial precursor	18	7		1.24186		19					2					9					Cytoplasm	0	0.092
IPI00012913	SPRY2	SPRY2 protein											4										Plasma Membrane	0	0
IPI00012918	ARID5A	ARID5A protein	2							12		33.054	1										Nucleus	0	0
IPI00012970	PPP6C	Serine/threonine protein phosphatase 6	2	1		1.4093																	Nucleus	0	0	Yes
IPI00012972	NME4	Non-metastatic cells 4, protein expressed in	1																				Cytoplasm	0	0.211
IPI00012977	BTN3A3	Butyrophilin subfamily 3 member A3 precursor																1					Plasma Membrane	1	0.999
IPI00012989	MAN2B1	Mannosidase, alpha, class 2B, MeMber 1 precursor	2					5	12	2	10.1193	1.05706	1					9	1		0.347837		Extracellular Space	0	0.998
IPI00012990	WNT7A	Wnt-7a protein precursor																2					Plasma Membrane	1	0.788
IPI00012998	CPSF6	HPBRII-4 mRNA	27	1		0.150996		14		3		0.600901	14					2	2	10	1.98558	5.12618	Nucleus	0	0
IPI00013002	UBE2C	Ubiquitin-conjugating enzyme E2 C	5																				Cytoplasm	0	0.008
IPI00013004	PDXK	Splice Isoform 1 of Pyridoxal kinase	62	5		0.272056		18	1	2	0.314544	0.333807	4					2	2		1.98558		Cytoplasm	0	0
IPI00013043	TPPP	Tubulin polymerization-promoting protein	1					2															Cytoplasm	0	0
IPI00013068	EIF3S6	Eukaryotic translation initiation factor 3 subunit 6	7	1		0.528487		12					18					2					Cytoplasm	0	0
IPI00013070	HNRPUL1	E1B-55kDa-associated protein	8					12	1		0.459718		9	1		0.842537		35	1	57	0.0966215	2.30438	Nucleus	0	0	Yes
IPI00013075	KATNA1	Splice Isoform 1 of Katanin p60 ATPase-containing subunit A1	2																				Cytoplasm	0	0	Yes
IPI00013122	CDC37	Hsp90 co-chaperone Cdc37	81	14		0.5633		45	1	5	0.12992	0.312084	21	3	4	1.05801	0.504451	9	2		0.595675		Cytoplasm	0	0
IPI00013146	MRPS22	Mitochondrial 28S ribosomal protein S22	2					2					2					4					Extracellular Space	0	0.985
IPI00013159	ETV6	Transcription factor ETV6						1															Nucleus	0	0
IPI00013160	LGTN	Splice Isoform 1 of Ligatin											1										Cytoplasm	0	0.001
IPI00013163	MNDA	Myeloid cell nuclear differentiation antigen																33	5	2	0.393878	0.113991	Nucleus	0	0	Yes
IPI00013167	MRPS25	Mitochondrial 28S ribosomal protein S25											3										Cytoplasm	0	0
IPI00013174	RBM14	Splice Isoform 1 of RNA-binding protein 14	1					3					23		2		0.25204	13					Unknown	0	0.001
IPI00013179	PTGDS	Prostaglandin-H2 D-isomerase precursor		2		7.4558			5		25.8817								11		28.2621		Extracellular Space	0	0.999	Yes
IPI00013180	BUD31	G10 protein homolog						4		1		0.734234	1		3		4.28672	3					Nucleus	0	0	Yes
IPI00013184	ARD1A	N-terminal acetyltransferase complex ARD1 subunit homolog	12					10					4					1					Nucleus	0	0
IPI00013193	MYO7A	Splice Isoform 1 of Myosin-7A																1		3		2.65678	Cytoplasm	0	0	Yes
IPI00013195	MRPL49	Mitochondrial 39S ribosomal protein L49	3					2		2		2.11411	7	1		1.05317		3					Cytoplasm	0	0.046
IPI00013212	CSK	Tyrosine-protein kinase CSK											3					1					Cytoplasm	0	0.012
IPI00013214	MCM3	DNA replication licensing factor MCM3	15	5	1	1.07122	0.415841	44	1	35	0.132808	2.0998	24		15		1.55469	4					Nucleus	0	0
IPI00013219	ILK	Integrin-linked protein kinase 1	1					2					3										Plasma Membrane	0	0	Yes
IPI00013234	IARS	IARS protein	18	16	21	2.77086	6.30119	2	1	15	1.99211	13.6892	46		25		1.36409	2	2	5	1.98558	2.72976	Cytoplasm	0	0	Yes
IPI00013236	SYBL1	Synaptobrevin like protein 1B	1																				Cytoplasm	0	0.379
IPI00013241	UBL5	Ubiquitin-like protein 5	6	1		0.603986		1					2										Cytoplasm	0	0
IPI00013256	CSTF2	Splice Isoform 1 of Cleavage stimulation factor, 64 kDa subunit	27	1	1	0.150996	0.237624	10					9					6	2		0.850964		Nucleus	0	0
IPI00013260	LSP1	Lymphocyte-specific protein 1																40	19	3	1.1729	0.129599	Cytoplasm	0	0	Yes
IPI00013262	UNC119	Splice Isoform A of Unc-119 protein homolog	5																				Cytoplasm	0	0.007
IPI00013271	DERL1	Derlin-1		1	1	4.2279	6.65346						2							3		5.31356	Plasma Membrane	5	0.065
IPI00013272	GOLGA4	Splice Isoform 1 of Golgin subfamily A member 4	5					1															Cytoplasm	0	0.001	Yes
IPI00013278	C20orf149	Splice Isoform 1 of Protein C20orf149	3					3															Unknown	0	0.003	Yes
IPI00013279	CHCHD7	Coiled-coil-helix-coiled-coil-helix domain containing protein 7																2	1		1.15946		Unknown	0	0
IPI00013290	HDGF2	75 kDa protein	8	6		2.26304			1		5.97634		10	1		0.765943							Unknown	0	0
IPI00013293	TMEM147	Seven transmembrane domain protein								2		6.34234											Plasma Membrane	6	0.054
IPI00013296	RPS18	40S ribosomal protein S18	23	7	11	0.983137	2.63284	13		17		3.31499	16	2	11	0.932397	1.69231	4	1	2	0.695675	0.775141	Cytoplasm	0	0	Yes
IPI00013297	PDAP1	28 kDa heat- and acid-stable phosphoprotein		7	1	23.5953	6.65346	4	1		1.19527		53	2		0.293532		5	4		1.81892		Cytoplasm	0	0	Yes
IPI00013299	NBL1	Neuroblastoma, suppression of tumorigenicity 1		5		17.1395																	Extracellular Space	0	0.997	Yes
IPI00013302	ADAM15	ADAM 15 precursor		5		17.1395			1		5.97634			2		15.8507							Plasma Membrane	1	1	Yes
IPI00013328	TUSC3	Splice Isoform 1 of Tumor suppressor candidate 3	5																				Plasma Membrane	5	0.93
IPI00013396	SNRPC	U1 small nuclear ribonucleoprotein C	5					6					10	1		0.765943		20					Nucleus	0	0
IPI00013400	MMP7	Matrilysin precursor																	7		18.3486		Extracellular Space	0	1
IPI00013406	SNAPC2	snRNA-activating protein complex subunit 2	1																				Nucleus	0	0.012	Yes
IPI00013415	RPS7	40S ribosomal protein S7	29	3		0.356123		28	2	171	0.377678	15.7852	21	1	17	0.382972	1.99619	3		2		0.968927	Cytoplasm	0	0	Yes
IPI00013427	MTM1	Myotubularin																		2		3.87571	Cytoplasm	0	0	Yes
IPI00013439	JUNB	Transcription factor jun-B						1										2					Nucleus	0	0
IPI00013441	SUV420H2	Suppressor of variegation 4-20 homolog 2																2					Nucleus	0	0
IPI00013449	TSPAN6	Tetraspanin-6								1		3.67117								3		5.31356	Plasma Membrane	4	0.003
IPI00013452	EPRS	Hypothetical protein DKFZp313B047	148	33	10	0.721615	0.386138	51	1	7	0.11493	0.378811	141	6	27	0.32079	0.487049	4	3		1.68702		Cytoplasm	0	0.024	Yes
IPI00013454	RGS10	Splice Isoform 1 of Regulator of G-protein signaling 10	8					3					7	1		1.05317							Cytoplasm	0	0
IPI00013457	ZNF207	Splice Isoform 1 of Zinc finger protein 207	3	1	3	1.05697	4.49009	1					7		2		0.75612	7		3		0.664195	Nucleus	0	0
IPI00013459	NDUFB5	NADH-ubiquinone oxidoreductase SGDH subunit, mitochondrial precursor	1					3		3		2.25338						1					Plasma Membrane	1	0.916
IPI00013466	ASNA1	Arsenical pump-driving ATPase	1	1		2.11395		10					4										Nucleus	0	0.001
IPI00013468	BUB3	Mitotic checkpoint protein BUB3	17					9					12		4		0.853687	16	1	3	0.20461	0.312562	Nucleus	0	0
IPI00013475	TUBB2A	Beta tubulin						395		172		1.16273											Cytoplasm	0	0	Yes
IPI00013485	RPS2	40S ribosomal protein S2		2		7.4558		20		11		1.4468		1	2	8.42537	6.04896		1		3.47837		Cytoplasm	0	0	Yes
IPI00013495	ABCF1	Splice Isoform 2 of ATP-binding cassette sub-family F member 1	28	1		0.14579		25					15	1	2	0.526586	0.37806	3					Cytoplasm	0	0	Yes
IPI00013508	ACTN1	Alpha-actinin 1	381	99	50	0.839168	0.742599	270	148	117	2.72139	1.15693	219	21	22	0.713331	0.256994	88	60	321	1.68205	5.1972	Cytoplasm	0	0	Yes
IPI00013623	SLC27A3	Solute carrier family 27 member 3; fatty acid tranSport protein 3	2					5										1		1		1.21893	Cytoplasm	0	0
IPI00013651	RBM33	Hypothetical protein DKFZp434D1319								2		6.34234			2		6.04896	2					Unknown	0	0.008
IPI00013654	DCTN3	Dynactin 3, isoform 2	1					1		2		3.17117	5										Nucleus	0	0
IPI00013676	SQSTM1	Phosphotyrosine independent ligand p62B for the Lck SH2 domain B-cell isoform	26					66	9	12	0.683389	0.493344	3					7					Cytoplasm	0	0.036
IPI00013677	SURB7	Mediator of RNA polymerase II transcription subunit 21	2					2										1					Nucleus	0	0
IPI00013678	MTX1	Metaxin 1	7					8															Plasma Membrane	1	0
IPI00013679	DUT	Splice Isoform DUT-M of Deoxyuridine 5'-triphosphate nucleotidohydrolase, mitochondrial precursor	15	6	3	1.27296	1.12252	4	2		2.19054		15	3		1.45476							Nucleus	0	0.683
IPI00013683	TUBB3	Tubulin beta-3 chain	197	98		1.6027		251		110		1.16995	235		108		1.15951	44	22		1.23387		Cytoplasm	0	0	Yes
IPI00013698	ASAH1	Acid ceramidase precursor	40	5	8	0.418037	1.1275	11	1	8	0.498028	1.86411						12					Extracellular Space	0	1
IPI00013706	MRPL20	Similar to mitochondrial ribosomal protein L20	5					1										1					Unknown	0	0.014
IPI00013723	PIN1	Peptidyl-prolyl cis-trans isomerase NIMA-interacting 1	11	2	1	0.621317	0.554455	7	2		1.36908		4	1		1.68507		5	1	2	0.579729	0.645951	Nucleus	0	0
IPI00013744	ITGA2	Integrin alpha-2 precursor	2	10	15	11.093	28.6006	9		48		12.9216	2		22		18.8462			9		13.9407	Plasma Membrane	1	0.999
IPI00013774	HDAC1	Histone deacetylase 1	22	10		1.44691		8					4					10					Nucleus	0	0
IPI00013779	C16orf70	UPF0183 protein	1																				Cytoplasm	0	0
IPI00013788	HTATSF1	HIV TAT specific factor 1	3					11	1		0.498028		3		1		0.88112	8	4		1.21261		Nucleus	0	0
IPI00013808	ACTN4	Alpha-actinin 4	443	133	74	0.969168	0.944496	291	153	108	2.61089	0.991391	313	23	39	0.547081	0.316735	151	93	470	1.52295	4.45257	Cytoplasm	0	0	Yes
IPI00013809	GSTZ1	Maleylacetoacetate isomerase	5	1		0.70465		3															Cytoplasm	0	0.005
IPI00013826	NPR3	Splice Isoform 1 of Atrial natriuretic peptide clearance receptor precursor		3		10.6837																	Plasma Membrane	1	0.998
IPI00013830	SNW1	Nuclear protein SkiP	1					3		1		0.917792	16	1	14	0.49561	2.13781	7		4		0.843927	Nucleus	0	0.052
IPI00013831	CD48	B-lymphocyte activation marker BLAST-1 precursor																1		5		4.09463	Plasma Membrane	1	0.994
IPI00013832	15E1.2	Putative protein 15E1.2	2																				Unknown	0	0.613
IPI00013838	INPPL1	51C protein	4	1		0.84558												3					Cytoplasm	0	0.549
IPI00013847	UQCRC1	Ubiquinol-cytochrome-c reductase complex core protein I, mitochondrial precursor	30	5		0.552887		20					19		1		0.176224	52	18	15	0.860579	0.425808	Cytoplasm	0	0.68
IPI00013860	HIBADH	3-hydroxyisobutyrate dehydrogenase, mitochondrial precursor	6	1		0.603986		3					5					21		17		1.15652	Extracellular Space	0	0.993
IPI00013862	DTYMK	Thymidylate kinase	15					3					9										Unknown	0	0.063
IPI00013871	RRM1	Ribonucleoside-diphosphate reductase large subunit	18	5	2	0.902079	0.647733																Nucleus	0	0	Yes
IPI00013874	CXCL1	Growth regulated protein alpha precursor		3		10.6837			1		5.97634			23		171.784		4	15		7.63512		Extracellular Space	0	1
IPI00013877	HNRPH3	Splice Isoform 1 of Heterogeneous nuclear ribonucleoprotein H3	20	14		2.19955		30	3	3	0.513839	0.290758	20		2		0.288046	40	3	12	0.205735	0.445225	Nucleus	0	0	Yes
IPI00013881	HNRPH1	Heterogeneous nuclear ribonucleoprotein H1	109	19	3	0.566637	0.163276	55	3	39	0.284447	1.87814	95	3	33	0.24246	0.878207	75	19	33	0.632751	0.637489	Nucleus	0	0.003	Yes
IPI00013885	CASP14	Caspase-14 precursor																		3		5.31356	Cytoplasm	0	0.007	Yes
IPI00013890	SFN	14-3-3 protein sigma	49	5		0.34279		155	40		1.28239		26					6	4	20	1.55907	4.25101	Cytoplasm	0	0	Yes
IPI00013891	TRA2A	Splice Isoform Long of Transformer-2 protein homolog											5					1					Nucleus	0	0
IPI00013892	PSCD3	Splice Isoform 1 of Cytohesin-3	2																				Cytoplasm	0	0
IPI00013894	STIP1	Stress-induced-phosphoprotein 1	176	24	2	0.443331	0.0695306	61	3		0.25692		114	12	15	0.783517	0.337976	16	4		0.64197		Cytoplasm	0	0	Yes
IPI00013895	S100A11	Calgizzarin	59	12		0.662247		108	17	6	0.7853	0.156211	13	4		2.19296		66	1	11	0.051916	0.250991	Cytoplasm	0	0	Yes
IPI00013897	ADAM10	ADAM 10 precursor	49	44	35	2.86055	3.97742	2	1	3	1.99211	3.0045		4	21	30.7015	54.0141	10	1	41	0.316216	5.45018	Plasma Membrane	1	0.999	Yes
IPI00013905	PRKAB2	5'-AMP-activated protein kinase, beta-2 subunit	1																				Unknown	0	0
IPI00013912	C1orf198	Novel protein																2					Unknown	0	0.527
IPI00013917	RPS12	40S ribosomal protein S12	74	3	1	0.142449	0.0887128	18	6	5	1.62411	0.755571	24	3		0.931045		31	11		0.883191		Cytoplasm	0	0.002	Yes
IPI00013925	GALT	Galactose-1-phosphate uridylyltransferase	2																				Unknown	0	0
IPI00013930	STX6	Syntaxin-6	9					3					7							13		19.6921	Plasma Membrane	1	0
IPI00013933	DSP	Splice Isoform DPI of Desmoplakin	3	13		10.7407		5	2	4	1.82545	1.94745						23	7	30	0.764525	1.83898	Plasma Membrane	0	0	Yes
IPI00013939	RPA2	Replication protein A 32 kDa subunit	8	1		0.469767		5					3		1		0.88112	6	1		0.49691		Nucleus	0	0.001
IPI00013940	SYNGR1	Splice Isoform 1A of Synaptogyrin-1																		2		3.87571	Plasma Membrane	4	0.007
IPI00013946	SYNGR2	Synaptogyrin-2	7																	4		6.75141	Plasma Membrane	4	0.413
IPI00013949	SGTA	Small glutamine-rich tetratricopeptide repeat-containing protein A	10	1		0.384355		1					5										Cytoplasm	0	0.015
IPI00013955	MUC1	Splice Isoform 1 of Mucin-1 precursor		1	5	4.2279	29.2673	33	17	18	2.51758	1.44356						8	17		4.79248		Plasma Membrane	1	0.997	Yes
IPI00013968	COX7C	Cytochrome c oxidase polypeptide VIIc, mitochondrial precursor	4					1		3		4.50675											Cytoplasm	0	0.001
IPI00013969	FCGR2B	Splice Isoform IIB1 of Low affinity immunoglobulin gamma Fc region receptor II-b precursor																		7		11.065	Plasma Membrane	1	0.957
IPI00013972	CEACAM8	Carcinoembryonic antigen-related cell adhesion molecule 8 precursor																4					Extracellular Space	0	0.994	Yes
IPI00013976	LAMB1	Similar to Laminin B1 protein	2	32		34.7643		10	35		15.9247		8	18	4	14.9619	1.2331	7	8		2.60337		Extracellular Space	0	1
IPI00013981	YES1	Proto-oncogene tyrosine-protein kinase YES	7	3	2	1.33546	1.53836	2		1		1.22372	1					1					Cytoplasm	0	0
IPI00013991	TPM2	Splice Isoform 1 of Tropomyosin beta chain						23	4		0.871056		28							1		2.43785	Cytoplasm	0	0	Yes
IPI00014048	RNASE1	Ribonuclease pancreatic precursor							25		125.408								11		28.2621		Plasma Membrane	1	0.996	Yes
IPI00014053	TOMM40	Splice Isoform 1 of Probable mitochondrial import receptor subunit TOM40 homolog	28	2	1	0.257097	0.22943	5					7		1		0.44056	11	2	3	0.496395	0.442797	Cytoplasm	0	0.085	Yes
IPI00014068	PAK4	Splice Isoform 1 of Serine/threonine-protein kinase PAK 4	3					1					1					1					Cytoplasm	0	0
IPI00014147	KIAA0101	HCV NS5A-transactivated protein 9											2										Nucleus	0	0.008	Yes
IPI00014149	TTC35	Tetratricopeptide repeat protein KIAA0103	6					4					3					3		2		0.968927	Nucleus	0	0
IPI00014151	PSMD6	26S proteasome non-ATPase regulatory subunit 6	24	8	2	1.07293	0.492277	13		7		1.40701	20		8		1.00933		2	2	5.95675	3.87571	Cytoplasm	0	0
IPI00014171	HERPUD1	Splice Isoform 1 of Homocysteine-responsive endoplasmic reticulum-resident ubiquitin-like domain member 1 protein											1										Cytoplasm	0	0
IPI00014172	LAPTM4A	Lysosomal-associated transmembrane protein 4A						1															Plasma Membrane	4	0.001
IPI00014174	MORF4L2	Mortality factor 4-like protein 2	4					1					2										Nucleus	0	0
IPI00014177	39327	Septin-2	27					32		8		0.677859	24		8		0.847834	7		20		3.71963	Cytoplasm	0	0
IPI00014194	C2orf29	Protein C2orf29	1																				Unknown	0	0.106
IPI00014197	CDV3	Hypothetical protein	13	17		3.99102		20	8		1.94337		57	3		0.401312		14	12		2.04936		Unknown	0	0.004	Yes
IPI00014198	EXOSC7	Exosome complex exonuclease RRP42																2					Nucleus	0	0
IPI00014213	LARS2	Probable leucyl-tRNA synthetase, mitochondrial precursor											3										Cytoplasm	0	0.094	Yes
IPI00014214	R3HDM1	R3H domain protein 1													4		11.0979						Unknown	0	0
IPI00014230	C1QBP	Complement component 1, Q subcomponent binding protein, mitochondrial precursor	48	13	8	0.87679	0.943422	16	3	6	0.937001	1.00159	37	6	9	1.19874	0.624219	36					Cytoplasm	0	0.849
IPI00014232	ARL6IP1	ARL-6-interacting protein 1	2	2		2.48527		4					4										Plasma Membrane	4	0
IPI00014236	SLC39A14	Zinc transporter ZIP family protein						1							2		6.04896			10		15.3785	Plasma Membrane	6	0.999
IPI00014238	KARS	Lysyl-tRNA synthetase	34	19	2	1.78086	0.351626	7		2		0.792792	26	3	4	0.862078	0.411034	5	4		1.81892		Cytoplasm	0	0
IPI00014253	RRS1	Ribosome biogenesis regulatory protein homolog	2										6										Nucleus	0	0	Yes
IPI00014255	IQCB1	Splice Isoform 1 of IQ calmodulin-binding motif containing protein 1											1										Extracellular Space	0	0
IPI00014260	DMBT1	DMBT1/8kb.1 protein		1		4.2279			20	13	100.527	35.7252											Plasma Membrane	0	0.902	Yes
IPI00014263	EIF4H	Eukaryotic translation initiation factor 4H isoform 1	11	3	2	0.890308	1.02558	11					11	1		0.702114		2	3		2.81171		Unknown	0	0	Yes
IPI00014264	CENTB2	Centaurin-beta 2											2							2		3.87571	Nucleus	0	0	Yes
IPI00014266	BRD3	Splice Isoform 1 of Bromodomain-containing protein 3	1										1										Nucleus	0	0.078
IPI00014287	FOLR3	Splice Isoform Long of Folate receptor gamma precursor																		1		2.43785	Extracellular Space	0	1	Yes
IPI00014310	CUL1	Splice Isoform 1 of Cullin-1								2		6.34234	12										Nucleus	0	0
IPI00014311	CUL2	Cullin-2						2		1		1.22372											Nucleus	0	0
IPI00014312	CUL3	Splice Isoform 1 of Cullin-3	3	1		1.05697			1		5.97634		4										Nucleus	0	0	Yes
IPI00014322	CREM	HCREM 1alpha protein											2					1					Nucleus	0	0
IPI00014340	PPP1R12C	Myosin binding subunit 85	2					1					1					1					Cytoplasm	0	0.003
IPI00014361	TSTA3	GDP-L-fucose synthetase	10	14	3	4.19914	1.63276			3		9.01351	2		1		1.17483	2					Plasma Membrane	0	0.034
IPI00014367	NSMCE4A	Splice Isoform 1 of Protein C10orf86	3																				Unknown	0	0	Yes
IPI00014371	CDH18	Cadherin-18 precursor		1		4.2279																	Plasma Membrane	1	0.989
IPI00014376	RAB31	RAB31, member RAS oncogene family variant						1										1		2		1.93785	Cytoplasm	0	0.003
IPI00014377	RAB32	Ras-related protein Rab-32	2	2		2.48527							1										Cytoplasm	0	0.002
IPI00014398	FHL1	Four and a half LIM domains 1 variant											23		2		0.25204	2					Cytoplasm	0	0	Yes
IPI00014399	FHL3	Four and a half LIM domains protein 3							1		5.97634		1					1					Plasma Membrane	0	0
IPI00014400	DNAJB12	DnaJ homolog subfamily B member 12	1										1										Plasma Membrane	1	0
IPI00014424	EEF1A2	Elongation factor 1-alpha 2						241	14	114	0.29202	1.26245											Cytoplasm	0	0.003	Yes
IPI00014439	QDPR	Dihydropteridine reductase	10	5		1.55814		12					1					6	6		2.26718		Unknown	0	0.144	Yes
IPI00014454	RIN1	Splice Isoform RIN1 of Ras and Rab interactor 1											10										Cytoplasm	0	0
IPI00014456	STRN	Striatin	4					4										4					Cytoplasm	0	0.002	Yes
IPI00014474	AKAP8	A-kinase anchor protein 8						2	1		1.99211		1					3	1	8	0.869593	3.12571	Nucleus	0	0.003
IPI00014481	AAMP	Angio-associated migratory cell protein	9	4		1.39116							3										Unknown	0	0
IPI00014482	ALKBH1	Alkylated DNA repair protein alkB homolog								1		3.67117						1					Unknown	0	0.757
IPI00014513	YY1	Transcriptional repressor protein YY1																2					Nucleus	0	0
IPI00014516	CALD1	Splice Isoform 1 of Caldesmon	1		4		11.8069	15	4		1.30658		39	1		0.210634		15	6	35	0.99189	3.2078	Cytoplasm	0	0
IPI00014533	UBTF	Splice Isoform UBF1 of Nucleolar transcription factor 1	3					7										5	1		0.579729		Nucleus	0	0
IPI00014537	CALU	Calumenin precursor	18	16		2.77086		31	10	6	1.58636	0.532094	33	11	17	2.43174	1.29165	35					Cytoplasm	0	0.619	Yes
IPI00014539	HOXB9	Homeobox protein Hox-B9													11		28.7693						Nucleus	0	0.002
IPI00014572	SPARC	SPARC precursor						2	104	9	172.846	8.34684	2	34	23	84.4876	19.6877		4		10.9135		Extracellular Space	0	1	Yes
IPI00014577	RAB18	Ras-related protein Rab-18	10	2		0.6778		13		1		0.262226						1	4	6	5.45675	4.81356	Cytoplasm	0	0.001
IPI00014589	CLTB	Splice Isoform Brain of Clathrin light chain B	3					3	2		2.73817		2										Plasma Membrane	0	0
IPI00014624	AP3S1	Adapter-related protein complex 3 sigma 1 subunit	1					2										1		3		2.65678	Cytoplasm	0	0.064
IPI00014625	CLCA1	Calcium-dependent chloride channel-1											1										Extracellular Space	0	0.995
IPI00014808	PAFAH1B3	Platelet-activating factor acetylhydrolase IB gamma subunit	4					14					5					1					Cytoplasm	0	0
IPI00014812	MRPS21	Mitochondrial 28S ribosomal protein S21	1					3					3					1					Cytoplasm	0	0.004
IPI00014831	PDK1	[Pyruvate dehydrogenase [lipoamide]] kinase isozyme 1, mitochondrial precursor	1																				Cytoplasm	0	0.885
IPI00014835	MRPS9	Mitochondrial ribosomal protein S9	6					2					3										Cytoplasm	0	0.322
IPI00014843	LRRC16	OTTHUMP00000039401						2															Unknown	0	0	Yes
IPI00014845	DNAH8	OTTHUMP00000017871																	1	1	3.47837	2.43785	Unknown	0	0	Yes
IPI00014850	PEA15	Astrocytic phosphoprotein PEA-15	22	6		0.885539		6					7					7	2		0.744593		Cytoplasm	0	0	Yes
IPI00014877	QPCTL	Glutaminyl-peptide cyclotransferase-like variant	1																				Plasma Membrane	1	0.109
IPI00014893	NDE1	NDE1 protein	4		3		3.59208			2		6.34234											Nucleus	0	0
IPI00014898	PLEC1	Splice Isoform 1 of Plectin 1	4	7	3	4.71906	3.59208	10	2	3	0.995698	0.81941	221	6	41	0.20519	0.470738	216	62	35	0.712715	0.23652	Cytoplasm	0	0	Yes
IPI00014903	FGFR1OP2	Hypothetical protein FLJ10672																1					Cytoplasm	0	0
IPI00014911	TRPM2	Splice Isoform 1 of Transient receptor potential cation channel subfamily M member 2																2					Plasma Membrane	6	0	Yes
IPI00014919	UGP1	UTP--glucose-1-phosphate uridylyltransferase 1			3		17.9604		1	5	5.97634	14.3558	2						4		10.9135		Cytoplasm	0	0
IPI00014923	RARA	PML-RAR protein																		10		15.3785	Nucleus	0	0	Yes
IPI00014938	CIP29	Nuclear protein Hcc-1	6	8	8	3.83189	6.60395	6	2		1.56467		10					9	3	2	0.843512	0.387571	Nucleus	0	0	Yes
IPI00014958	PON2	Splice Isoform 1 of Serum paraoxonase/arylesterase 2	8	1		0.469767		18										3					Extracellular Space	0	0.067
IPI00014977	MCM9	Hypothetical protein C6orf61	1																				Unknown	0	0
IPI00015018	PPA1	Inorganic pyrophosphatase	99	3	2	0.106837	0.123069	44	2	5	0.243393	0.319019	24	5	2	1.52507	0.241959	15	3		0.527195		Cytoplasm	0	0
IPI00015029	PTGES3	Telomerase-binding protein p23	26	23	2	2.78673	0.455812	24	7	2	1.43337	0.253694	39	6	15	1.13881	0.971681	16	7		1.07933		Cytoplasm	0	0	Yes
IPI00015077	EIF1	Eukaryotic translation initiation factor 1	12	3		0.821823		9	5		2.58817		15	4		1.91884		8					Cytoplasm	0	0
IPI00015102	ALCAM	CD166 antigen precursor	48	18	66	1.20617	7.63527	3					16	10	12	4.42669	1.84081						Plasma Membrane	1	0.985	Yes
IPI00015104	CKS1B	Cyclin-dependent kinases regulatory subunit 1	1	5		8.56975		5	3		2.65484		4	2		3.17015		2					Cytoplasm	0	0
IPI00015105	CKS2	Cyclin-dependent kinases regulatory subunit 2	2	2		2.48527		2					2										Unknown	0	0
IPI00015117	LAMC2	Splice Isoform Long of Laminin gamma-2 chain precursor	2	11		12.169			12		60.7161							8	4	3	1.21261	0.590396	Extracellular Space	0	1
IPI00015139	LOC648210	29 kDa protein																27					Unknown	0	0.001
IPI00015140	MT-CYB	Cytochrome b																		2		3.87571	Plasma Membrane	9	0.041
IPI00015141	CKMT2	Creatine kinase, sarcomeric mitochondrial precursor			1		6.65346																Cytoplasm	0	0.664
IPI00015144	TYROBP	Splice Isoform 1 of TYRO protein tyrosine kinase-binding protein precursor																2		10		5.12618	Plasma Membrane	1	0.995
IPI00015148	RAP1B	Ras-related protein Rap-1b	31	5	2	0.535609	0.384591	11		3		0.751126	11		3		0.714454	2					Cytoplasm	0	0.196
IPI00015186	ESM1	Endothelial cell-specific molecule 1 precursor												5		38.1269							Extracellular Space	0	1
IPI00015195	CSTF3	Cleavage stimulation factor, 77 kDa subunit	14	4		0.92744							12					1					Nucleus	0	0	Yes
IPI00015262	CNN2	Calponin-2	25		8		1.77799	11		6		1.41892	14					3					Cytoplasm	0	0
IPI00015285	PCYT2	Ethanolamine-phosphate cytidylyltransferase						2					3		2		1.51224						Cytoplasm	0	0
IPI00015286	DOCK1	Dedicator of cytokinesis protein 1	1																				Cytoplasm	0	0
IPI00015346	CELSR2	Cadherin EGF LAG seven-pass G-type receptor 2 precursor	2	10		11.093														1		2.43785	Plasma Membrane	7	1	Yes
IPI00015351	C1orf128	AD039	8	1		0.469767		7										1	2	2	2.97837	1.93785	Unknown	0	0	Yes
IPI00015361	PFDN5	Prefoldin subunit 5	15		2		0.769182	6	1	1	0.853763	0.524453	14					2					Nucleus	0	0
IPI00015404	ARID1B	Splice Isoform 1 of AT-rich interactive domain-containing protein 1B																2					Nucleus	0	0.776	Yes
IPI00015473	SLC1A3	Excitatory amino acid transporter 1								2		6.34234								15		22.5678	Plasma Membrane	10	0
IPI00015476	SLC1A4	Neutral amino acid transporter A						1		5		7.17792			3		8.57344	1		8		6.25141	Plasma Membrane	9	0.131
IPI00015505	HPS6	Hermansky-Pudlak syndrome 6 protein											1										Cytoplasm	0	0.384
IPI00015526	EHMT1	Splice Isoform 1 of Histone-lysine N-methyltransferase, H3 lysine-9 specific 5																1					Nucleus	0	0
IPI00015550	PTMA	Prothymosin alpha	1										17										Nucleus	0	0
IPI00015580	FNBP1L	Transducer of Cdc42-dependent actin assembly-1	11	2		0.621317							1										Unknown	0	0
IPI00015593	ZNF294	Zinc finger protein 294																		1		2.43785	Nucleus	0	0
IPI00015602	TOMM70A	Mitochondrial precursor proteins import receptor	55	8		0.478986		16					24					27					Plasma Membrane	2	0.936
IPI00015614	PRSS3	Splice Isoform A of Trypsin III precursor																		9		13.9407	Extracellular Space	0	0	Yes
IPI00015671	TUBAL3	Hypothetical protein FLJ21665																8					Unknown	0	0.009
IPI00015688	GPC1	Glypican-1 precursor							3		15.929								11	7	28.2621	11.065	Extracellular Space	0	1
IPI00015689	SLC39A4	Splice Isoform 1 of Zinc transporter ZIP4 precursor						1												4		6.75141	Plasma Membrane	7	0.998
IPI00015736	UBE1DC1	Ubiquitin-activating enzyme E1-domain containing protein 1	21	7	1	1.07251	0.30243	5					2		5		4.5408						Plasma Membrane	1	0	Yes
IPI00015773	COMMD3	COMM domain containing protein 3	2		1		2.21782			2		6.34234											Unknown	0	0.014
IPI00015785	CRB1	Splice Isoform 2 of Crumbs protein homolog 1 precursor																		7		11.065	Plasma Membrane	1	0.061	Yes
IPI00015793	SMG6	Splice Isoform 1 of Telomerase-binding protein EST1A																1					Nucleus	0	0.013	Yes
IPI00015799	DGAT1	Diacylglycerol O-acyltransferase 1						1											2		5.95675		Plasma Membrane	9	0.001
IPI00015801	CMTM6	CKLF-like MARVEL transmembrane domain-containing protein 6																		5		8.18927	Plasma Membrane	3	0.081
IPI00015804	DUS2L	tRNA-dihydrouridine synthase 2-like	2																				Cytoplasm	0	0.016
IPI00015806	GTF3C3	Splice Isoform 1 of General transcription factor 3C polypeptide 3											1						1		3.47837		Nucleus	0	0
IPI00015808	GNL2	Nucleolar GTP-binding protein 2											1										Nucleus	0	0	Yes
IPI00015809	OSGEP	Probable O-sialoglycoprotein endopeptidase						3							1		3.52448						Unknown	0	0
IPI00015811	RASA2	Ras GTPase-activating protein 2			1		6.65346																Extracellular Space	0	0.977
IPI00015833	CHCHD3	Coiled-coil-helix-coiled-coil-helix domain containing protein 3	8		7		4.50825	11	1	10	0.498028	2.30931	5		14		6.05712	10	1	12	0.316216	1.65948	Cytoplasm	0	0
IPI00015834	IMPAD1	Myo-inositol monophosphatase A3	3																				Plasma Membrane	1	0.736
IPI00015836	APPL1	DCC-interacting protein 13 alpha	6	4		1.98737		5					2					2	1		1.15946		Cytoplasm	0	0
IPI00015838	LYAR	Cell growth-regulating nucleolar protein	15	1		0.264244		8					16										Plasma Membrane	0	0
IPI00015842	RCN1	Reticulocalbin-1 precursor	38	12	6	1.01884	0.895404	32	3	2	0.482697	0.192192	20	1	5	0.401208	0.648686	24	2	7	0.23827	0.442599	Extracellular Space	0	0.999	Yes
IPI00015856	DNPEP	Aspartyl aminopeptidase		7		23.5953		3					2					4					Cytoplasm	0	0
IPI00015860	C12orf41	Hypothetical protein FLJ20436	1																				Unknown	0	0
IPI00015869	TCHH	Trichohyalin		1		4.2279																	Unknown	0	0
IPI00015880	TSPO	Peripheral benzodiazepine receptor		1		4.2279																	Plasma Membrane	3	0.955
IPI00015881	CSF1	Splice Isoform 1 of Macrophage colony-stimulating factor 1 precursor																	6		15.8702		Plasma Membrane	1	0.997	Yes
IPI00015891	PFDN4	Prefoldin subunit 4	7	1	2	0.528487	1.53836	2					8					2	1		1.15946		Cytoplasm	0	0	Yes
IPI00015894	CDC42EP4	Cdc42 effector protein 4	4															1					Cytoplasm	0	0.002
IPI00015897	CHORDC1	Cysteine and histidine-rich domain (CHORD)-containing, zinc binding protein 1	37	8		0.705874		38	2		0.280838		47	4	21	0.639614	1.12529	4					Unknown	0	0	Yes
IPI00015905	EXOSC2	Exosome complex exonuclease RRP4	2										3										Nucleus	0	0
IPI00015911	DLD	Dihydrolipoyl dehydrogenase, mitochondrial precursor	68	7	7	0.341961	0.588032	23		10		1.15465	45	2	6	0.344581	0.351019	50	15	38	0.748541	1.09095	Cytoplasm	0	0.039	Yes
IPI00015912	FAM50B	Protein FAM50B																2					Unknown	0	0
IPI00015920	SLC25A10	Splice Isoform 1 of Mitochondrial dicarboxylate carrier								4		11.6847						1					Cytoplasm	0	0.876
IPI00015944	EML2	Echinoderm microtubule-associated protein-like 2																	2	2	5.95675	3.87571	Plasma Membrane	1	0	Yes
IPI00015947	DNAJB1	DnaJ homolog subfamily B member 1	15	1		0.264244		22					10		3		0.779404	5	2		0.992791		Nucleus	0	0
IPI00015952	EIF4G2	Eukaryotic translation initiation factor 4 gamma 2						3		2		1.58558	1		5		6.8112	1		2		1.93785	Cytoplasm	0	0.005	Yes
IPI00015953	DDX21	Splice Isoform 1 of Nucleolar RNA helicase II	12	1		0.325223		10					38	2	9	0.406429	0.608214	6					Nucleus	0	0
IPI00015954	SAR1A	GTP-binding protein SAR1a	19	3	2	0.534185	0.615346	15		5		0.89724	1										Cytoplasm	0	0.002	Yes
IPI00015955	EXOSC5	Exosome complex exonuclease RRP46	2										1										Nucleus	0	0
IPI00015956	EXOSC3	Exosome complex exonuclease RRP40																2					Nucleus	0	0.404
IPI00015964	GAP43	Neuromodulin											3										Plasma Membrane	0	0	Yes
IPI00015972	COX6C	Cytochrome c oxidase polypeptide VIc precursor	10	1		0.384355		4		2		1.26847						6					Plasma Membrane	1	0.286
IPI00015973	EPB41L2	Band 4.1-like protein 2	13	2		0.532557		2					26	1	2	0.312051	0.224036						Plasma Membrane	0	0	Yes
IPI00015994	DLL4	Delta-like protein 4 precursor											3										Plasma Membrane	1	1
IPI00016006	GPHN	Gephyrin	5										2										Plasma Membrane	0	0	Yes
IPI00016014	ITM2C	Splice Isoform 1 of Integral membrane protein 2C						3															Plasma Membrane	1	0.002
IPI00016027	FZD2	Frizzled 2 precursor		2		7.4558																	Plasma Membrane	6	1
IPI00016041	KLK9	Serine protease kallikrein/ovasin/neuropsin type 3	1	21		34.3929			1		5.97634								5		13.3919		Extracellular Space	0	1
IPI00016046	C20orf52	Protein C20orf52	1																				Plasma Membrane	1	0.056
IPI00016074	MPHOSPH6	M-phase phosphoprotein 6											1					2					Nucleus	0	0
IPI00016077	GBAS	Protein NipSnap2	12	4		1.07012		6					5					5					Extracellular Space	0	0.96
IPI00016109	C19orf12	Conserved hypothetical protein	1																				Plasma Membrane	1	0.037
IPI00016112	PXDN	PREDICTED: Melanoma associated gene		44	3	143.028	17.9604		22	22	110.479	59.7657		7	19	52.9776	48.9651						Plasma Membrane	1	0.987	Yes
IPI00016179	S100A13	S100 calcium-binding protein A13	11	2		0.621317		10	4		1.90049		3					2					Cytoplasm	0	0
IPI00016249	FXR1	Fragile X mental retardation syndrome-related protein 1	9	1		0.42279		10					7					2					Cytoplasm	0	0
IPI00016250	FXR2	Fragile X mental retardation syndrome-related protein 2	4					4					9										Cytoplasm	0	0	Yes
IPI00016255	FLJ22662	HypotHetical protein LOC79887							1		5.97634							6	1		0.49691		Extracellular Space	0	0.999
IPI00016334	MCAM	Cell surface glycoprotein MUC18 precursor			5		29.2673																Plasma Membrane	1	1	Yes
IPI00016339	RAB5C	Similar to Ras-related protein Rab-5C	14	2	5	0.497053	1.95115	4					6		2		0.864138	2		5		2.72976	Cytoplasm	0	0.021
IPI00016342	RAB7A	Ras-related protein Rab-7	113	25	12	0.716645	0.603873	49		9		0.50081	18	2	6	0.83425	0.849836	8	5	33	1.48798	5.38324	Cytoplasm	0	0.163
IPI00016346	PROSC	Proline synthetase co-transcribed bacterial homolog protein	9					3					6					2	3		2.81171		Unknown	0	0.211
IPI00016353	DKK1	Dickkopf-related protein 1 precursor							6		30.858		4	28	29	41.7821	14.842						Extracellular Space	0	0.997	Yes
IPI00016356	MICAL3	PREDICTED: KIAA0819 protein							1	1	5.97634	3.67117											Cytoplasm	0	0
IPI00016372	RAB9A	Ras-related protein Rab-9A	5																	3		5.31356	Cytoplasm	0	0.179
IPI00016373	RAB13	Ras-related protein Rab-13		5		17.1395		1					2										Plasma Membrane	0	0.036
IPI00016381	RAB27A	Splice Isoform Long of Ras-related protein Rab-27A																		2		3.87571	Cytoplasm	0	0
IPI00016387	PCF11	Pre-mRNA cleavage comPlex II Protein Pcf11	1										2							1		2.43785	Nucleus	0	0
IPI00016405	OCIAD1	Hypothetical protein FLJ20455	21		1		0.30243	6		1		0.524453	5					3					Unknown	0	0
IPI00016418	AYTL1	Hypothetical protein FLJ20481																5	3	14	1.40585	3.52166	Plasma Membrane	1	0.091
IPI00016443	C11orf79	Hypothetical protein FLJ20487	5					1					1										Unknown	0	0.918
IPI00016447	COMMD8	COMM domain containing protein 8	5																				Unknown	0	0
IPI00016457	CRAT	Splice Isoform 1 of Carnitine O-acetyltransferase											1					1					Cytoplasm	0	0.009
IPI00016458	L2HGDH	Hypothetical protein FLJ12618																1		1		1.21893	Unknown	0	0.059
IPI00016472	ZC3H13	KIAA0853											2										Unknown	0	0	Yes
IPI00016481	TXNL4B	Thioredoxin-like protein 4B	1																				Nucleus	0	0
IPI00016513	RAB10	Ras-related protein Rab-10	34		11		1.80537	9		17		4.64099	7		7		2.33392			13		19.6921	Cytoplasm	0	0.218
IPI00016532	C4orf27	Hypothetical protein FLJ20534	2										1										Unknown	0	0	Yes
IPI00016534	CXCL9	Small inducible cytokine B9 precursor																	1		3.47837		Plasma Membrane	1	0.999
IPI00016539	SCD5	Hypothetical protein SCD4	5	1		0.70465																	Plasma Membrane	2	0
IPI00016553	SLCO2B1	Splice Isoform 1 of Solute carrier organic anion transporter family member 2B1																		2		3.87571	Plasma Membrane	11	0	Yes
IPI00016568	AK3L1	Adenylate kinase isoenzyme 4, mitochondrial	11					6					7		1		0.44056	3					Unknown	0	0.662
IPI00016570	BRD8	Splice Isoform 3 of Bromodomain-containing protein 8												1		8.42537							Nucleus	0	0	Yes
IPI00016572	SNRPG	Small nuclear ribonucleoprotein G	11		3		1.4967						1					2					Nucleus	0	0	Yes
IPI00016589	USP19	UbiqUitin specific protease 19	1										1					1					Plasma Membrane	1	0
IPI00016605	C1orf123	Hypothetical protein FLJ20580	8	6		2.26304		4					2		2		2.01632	1	1		1.73919		Unknown	0	0.001
IPI00016608	TMED2	Transmembrane emp24 domain trafficking protein 2 precursor	18	11	2	1.92142	0.647733			10		27.7117	4		4		2.21959	12	5	1	1.03014	0.187527	Plasma Membrane	2	0.998	Yes
IPI00016610	PCBP1	Poly(rC)-binding protein 1	103	21	13	0.661403	0.716298	82	1	18	0.0720041	0.591338	70	3	9	0.327833	0.334089	34	8	20	0.595057	0.850202	Nucleus	0	0.002	Yes
IPI00016613	CSNK2A1	CSNK2A1 protein	18	10		1.75153		17					10		2		0.549906	1					Cytoplasm	0	0
IPI00016621	AP2A2	Adapter-related protein complex 2 alpha 2 subunit	4		2		2.46138		1	4	5.97634	11.6847	5		10		4.37414	4	5	5	2.67837	1.63785	Cytoplasm	0	0.001	Yes
IPI00016634	C20orf11	Protein C20orf11	5					7					1										Nucleus	0	0
IPI00016635	ZFP36L1	Butyrate response factor 1																	1		3.47837		Nucleus	0	0.193	Yes
IPI00016637	OXSM	Hypothetical protein FLJ20604																3					Unknown	0	0
IPI00016639	PRKCI	Protein kinase C, iota type	29	7	2	0.78651	0.410231	2										3					Cytoplasm	0	0
IPI00016645	EPHA7	Splice Isoform 1 of Ephrin type-A receptor 7 precursor	1																	2		3.87571	Plasma Membrane	1	0.994	Yes
IPI00016669	RHEB	GTP-binding protein Rheb			1		6.65346	3															Plasma Membrane	0	0.01	Yes
IPI00016670	C11orf59	FLJ20625 protein	9					4										6					Unknown	0	0
IPI00016671	ZNF446	Zinc finger protein 446								2		6.34234											Nucleus	0	0.002
IPI00016676	TOMM20	Mitochondrial import receptor subunit TOM20 homolog	1		4		11.8069											6	1	4	0.49691	0.964488	Plasma Membrane	1	0.212
IPI00016688	HYAL3	Putative tumor suPPressor FUS2	1										1										Cytoplasm	0	0.001	Yes
IPI00016698	CTD-2248C21.2	GAGE-8 protein	3	2		1.86395																	Unknown	0	0
IPI00016702	RABGAP1	Rab6 GTPase activating pRotein	11	7		1.96627		12		3		0.693347	2							1		2.43785	Unknown	0	0
IPI00016703	DHCR24	24-dehydrocholesterol reductase precursor		4	3	13.9116	17.9604	7		4		1.46058	3		2		1.51224	1	2	4	2.97837	3.37571	Plasma Membrane	2	0.948
IPI00016709	CACNA1C	Splice Isoform HFCC of Voltage-dependent L-type calcium channel alpha-1C subunit			1		6.65346						2										Plasma Membrane	21	0
IPI00016725	GTF3C4	General transcription factor 3C polypeptide 4	3															3					Nucleus	0	0
IPI00016726	C14orf119	Protein C14orf119											1										Unknown	0	0.08
IPI00016746	CBFB	Core-binding factor, beta subunit	5					2					8					1					Nucleus	0	0
IPI00016780	PRDM2	Splice Isoform 1 of PR-domain zinc finger protein 2																2					Nucleus	0	0
IPI00016801	GLUD1	Glutamate dehydrogenase 1, mitochondrial precursor	56	25	4	1.43329	0.414278	25	1	1	0.229859	0.141199	22		1		0.153238	35	7		0.509684		Cytoplasm	0	0.883
IPI00016832	PSMA1	Splice Isoform Short of Proteasome subunit alpha type 1	32	6	1	0.617194	0.20162	25	4		0.804052		38	1		0.216035		11					Cytoplasm	0	0
IPI00016839	VARS2	TFIIH basal transcription factor complex p52 subunit													1		3.52448						Unknown	0	0.001
IPI00016862	GSR	Glutathione reductase, mitochondrial precursor	30	11	2	1.17764	0.396997	19	2	5	0.547634	0.717792	2					24	17	22	1.72529	1.30531	Extracellular Space	0	0.999	Yes
IPI00016890	IGSF3	ImmunoglobulIn superfamIly, member 3 Isoform 1			5		29.2673			2		6.34234								4		6.75141	Plasma Membrane	1	1
IPI00016891	RAB6B	Ras-related protein Rab-6B	25																				Cytoplasm	0	0
IPI00016910	EIF3S8	Eukaryotic translation initiation factor 3 subunit 8	1					20		10		1.3196	32										Cytoplasm	0	0
IPI00016912	TTC1	Tetratricopeptide repeat protein 1	25	2		0.286762		23	2		0.456361		12					6	2		0.850964		Unknown	0	0
IPI00016915	IGFBP7	Insulin-like growth factor binding protein 7 precursor		10		33.279			16		80.6214			12		90.1045			3		8.43512		Extracellular Space	0	0.998	Yes
IPI00016925	C12orf57	Putative C10 protein	2					5					5					1					Unknown	0	0.377
IPI00016968	SDHC	Succinate dehydrogenase cytochrome b560 subunit, mitochondrial precursor																	1		3.47837		Plasma Membrane	3	0.046	Yes
IPI00016988	WDR13	WD-repeat protein 13						1															Nucleus	0	0.016
IPI00017030	TIAF1	Splice Isoform 1 of Myosin-18A																4	1	1	0.695675	0.487571	Cytoplasm	0	0	Yes
IPI00017095	PLA2G12A	Group XIIA secretory phospholipase A2 precursor	1																				Extracellular Space	0	0.999
IPI00017160	VTA1	Protein C6orf55	11	3		0.890308		5					6										Unknown	0	0.004
IPI00017184	EHD1	EH-domain containing protein 1	25	1		0.162612		34	3		0.455115		30	2	2	0.511314	0.195128	3	3		2.10878		Cytoplasm	0	0.001
IPI00017256	RSU1	Ras suppressor protein 1	4					12	2	2	0.842513	0.487872	11										Cytoplasm	0	0
IPI00017258	NR6A1	Splice Isoform 1 of Orphan nuclear receptor NR6A1																2					Nucleus	0	0
IPI00017283	IARS2	Mitochondrial isoleucine tRNA synthetase	29	7	6	0.78651	1.16403	2		5		4.78528	14		4		0.739862	6	5	1	1.91312	0.348265	Extracellular Space	0	0.956	Yes
IPI00017292	CTNNB1	Splice Isoform 1 of Beta-catenin	104	19	15	0.59362	0.817161	46		24		1.38528	4	1	35	1.68507	17.8714	7	2	20	0.744593	3.71963	Nucleus	0	0
IPI00017297	MATR3	Matrin-3	41	4		0.331229		33	2	4	0.322138	0.343667	37	9	15	1.78496	1.02282	58	5	8	0.226981	0.211912	Nucleus	0	0.611	Yes
IPI00017303	MSH2	DNA mismatch repair protein Msh2	5		6		5.82013	11		22		4.98048	1		4		5.54896						Nucleus	0	0	Yes
IPI00017305	RPS6KA1	Ribosomal protein S6 kinase alpha 1	1					5															Cytoplasm	0	0.001	Yes
IPI00017331	FKBP14	FK506-binding protein 14 precursor						4															Cytoplasm	0	0.929
IPI00017334	PHB	Prohibitin	19	9	3	1.50255	0.898019	34		5		0.410167	33		2		0.177911	12	5	9	1.03014	1.07236	Nucleus	0	0.848
IPI00017337	ANXA13	Annexin A13 isoform a variant											1										Plasma Membrane	0	0
IPI00017339	SF3B4	Splicing factor 3B subunit 4	6	2		1.06511		4		2		1.26847	11		1		0.293707	8	1	10	0.386486	1.70873	Nucleus	0	0
IPI00017341	SF3A2	Splicing factor 3A subunit 2	17					11		1		0.305931	8		3		0.952605	3	1	1	0.869593	0.609463	Nucleus	0	0
IPI00017342	RHOG	Rho-related GTP-binding protein RhoG	12					1							1		3.52448	5		2		0.645951	Cytoplasm	0	0.015	Yes
IPI00017344	RAB5B	Ras-related protein Rab-5B	8		5		3.25192	6		3		1.28764								4		6.75141	Cytoplasm	0	0.012
IPI00017367	RDX	Radixin	79					48					63		48		1.90899	10					Cytoplasm	0	0	Yes
IPI00017373	RPA3	Replication protein A 14 kDa subunit	13					8					4	1		1.68507		3					Nucleus	0	0	Yes
IPI00017375	SEC23A	Protein transport protein Sec23A	59	8	4	0.447053	0.393564	10					27		29		2.65036	5	5	13	2.23198	3.28202	Cytoplasm	0	0	Yes
IPI00017376	SEC23B	Protein transport protein Sec23B	25					18		16		2.30204	16		11		1.69231			40		58.5141	Cytoplasm	0	0
IPI00017381	RFC4	Activator 1 37 kDa subunit	2					7		2		0.792792	5					1					Nucleus	0	0	Yes
IPI00017412	RFC2	Splice Isoform 1 of Activator 1 40 kDa subunit	5					7					5										Nucleus	0	0.022
IPI00017448	RPS21	40S ribosomal protein S21	18	7	2	1.24186	0.647733	7	2	1	1.36908	0.458896	32	12	2	2.73044	0.183302	16	6		0.933543		Cytoplasm	0	0	Yes
IPI00017450	GTF2F1	Transcription initiation factor IIF alpha subunit		3		10.6837		6	2		1.56467		17	2		0.880597		2	1	1	1.15946	0.812618	Nucleus	0	0
IPI00017451	SF3A1	Splicing factor 3 subunit 1	45	19		1.355		26	2		0.405655		37	9	2	1.78496	0.159183	33	5	9	0.393878	0.41002	Nucleus	0	0.001	Yes
IPI00017469	SPR	Sepiapterin reductase	5	1		0.70465		8		1		0.407908	4	1		1.68507		2					Cytoplasm	0	0.924
IPI00017510	MT-CO2	Cytochrome c oxidase subunit 2	9	4	2	1.39116	1.23069	6		2		0.906048	2					6	3	18	1.20502	3.84019	Plasma Membrane	2	0.001
IPI00017526	S100P	S-100P protein	1															1					Cytoplasm	0	0.001	Yes
IPI00017530	FCN2	Ficolin-2 precursor						1															Plasma Membrane	1	0.993	Yes
IPI00017552	MED9	Hypothetical protein FLJ10193	3																				Nucleus	0	0
IPI00017562	LPHN2	Splice Isoform 2 of Latrophilin-2 precursor																		4		6.75141	Plasma Membrane	7	0.983
IPI00017567	ENG	Splice Isoform Long of Endoglin precursor											2		4		3.69931			1		2.43785	Plasma Membrane	1	1	Yes
IPI00017578	SHB	Shb													3		8.57344						Unknown	0	0
IPI00017592	LETM1	Leucine zipper-EF-hand containing transmembrane protein 1, mitochondrial precursor	55	2		0.133139		37		3		0.237198	7		11		3.59616	18		15		1.18778	Plasma Membrane	1	0.036	Yes
IPI00017596	MAPRE1	Microtubule-associated protein RP/EB family member 1	51	8	1	0.515831	0.127951	17	2		0.608482		23					8	3		0.937235		Cytoplasm	0	0	Yes
IPI00017601	CP	Ceruloplasmin precursor	52	362	150	22.066	16.0192	14		18		3.27207			28		71.6855	23	73	130	7.58005	7.83004	Extracellular Space	0	1	Yes
IPI00017617	DDX5	Probable RNA-dependent helicase p68	17	3		0.593539		26		2		0.234901	36					24	2		0.23827		Nucleus	0	0	Yes
IPI00017659	RCSD1	Protein kinase substrate CapZIP																4	4		2.1827		Unknown	0	0	Yes
IPI00017669	SMARCE1	Splice Isoform 1 of SWI/SNF-related matrix-associated actin-dependent regulator of chromatin subfamily E member 1	7		1		0.831682	2					5		1		0.587414	10		2		0.352337	Nucleus	0	0.001
IPI00017670	SMPD2	Sphingomyelin phosphodiesterase 2	2	2		2.48527							1										Plasma Membrane	3	0.005
IPI00017672	NP	Purine nucleoside phosphorylase	84	25	14	0.961147	0.942923	28	11	7	1.92206	0.679248	20	2	4	0.754797	0.528473	11	12		2.56171		Nucleus	0	0	Yes
IPI00017696	C1S	Complement C1s subcomponent precursor							71	39	354.32	105.176			2		6.04896		20	2	50.5675	3.87571	Extracellular Space	0	1	Yes
IPI00017704	COTL1	Coactosin-like protein	9	2		0.74558		9		1		0.367117	26	3	6	0.862078	0.598033	10	2		0.541522		Cytoplasm	0	0	Yes
IPI00017726	HSD17B10	HADH2 protein	101	33	9	1.05412	0.508639	73		4		0.157901	9					23	12	12	1.28085	0.760593	Extracellular Space	0	0.976
IPI00017731	39330	Septin-5	1					1															Cytoplasm	0	0
IPI00017763	NAP1L4	Nucleosome assembly protein 1-like 4	16	6		1.19808		15	3		0.995563		17					2	4		3.63783		Nucleus	0	0
IPI00017799	TXN2	Thioredoxin, mitochondrial precursor	6	3		1.52624		5										4	1		0.695675		Cytoplasm	0	0.001
IPI00017802	AUH	Splice Isoform 1 of Methylglutaconyl-CoA hydratase, mitochondrial precursor	1															1		1		1.21893	Extracellular Space	0	0.994
IPI00017842	TP53I11	Hypothetical protein	6	1		0.603986												1	2	2	2.97837	1.93785	Unknown	0	0.007
IPI00017855	ACO2	Aconitate hydratase, mitochondrial precursor	34	1		0.120797		46					17					92	6	32	0.170648	0.505498	Cytoplasm	0	0.081
IPI00017895	GPD2	Glycerol-3-phosphate dehydrogenase, mitochondrial precursor	29	15	5	1.64728	0.975577	16		2		0.373079	5					9		6		0.962712	Plasma Membrane	1	0.858	Yes
IPI00017921	BICC1	Hypothetical protein FLJ22476			2		12.3069																Unknown	0	0
IPI00017963	SNRPD2	Small nuclear ribonucleoprotein Sm D2	9	4		1.39116		6	1		0.853763		16	2	2	0.932397	0.355821	17	5	2	0.743992	0.215317	Nucleus	0	0
IPI00017964	SNRPD3	Small nuclear ribonucleoprotein Sm D3	10	5	3	1.55814	1.63276	9	6		3.0858		11		4		0.924827	27	7		0.655307		Nucleus	0	0.015
IPI00017968	ADM	ADM precursor																	7		18.3486		Extracellular Space	0	0.995	Yes
IPI00017972	ZNF703	Splice Isoform 1 of Zinc finger protein 703													8		21.1959						Unknown	0	0.009	Yes
IPI00018001	PQLC1	Hypothetical protein FLJ22378											2										Plasma Membrane	4	0.758
IPI00018009	EDC3	YjeF domain-containing protein 1		1		4.2279		1					3										Cytoplasm	0	0.049	Yes
IPI00018026	BSDC1	Hypothetical protein DKFZp686H02133	4					3															Unknown	0	0
IPI00018031	ALDH3B1	Splice Isoform 1 of Aldehyde dehydrogenase 3B1	3					3															Cytoplasm	0	0	Yes
IPI00018037	SURF2	Surfeit locus protein 2											3										Unknown	0	0
IPI00018040	MED22	Splice Isoform Surf5B of Surfeit locus protein 5	2																				Cytoplasm	0	0
IPI00018069	SS18	Splice Isoform 1 of SSXT protein	2										2					2					Nucleus	0	0
IPI00018090	IFT74	Intraflagellar transport 74 homolog	7										1										Unknown	0	0.005
IPI00018117	DAP	Death-associated protein 1		1		4.2279			1		5.97634		11	3		1.93968							Cytoplasm	0	0
IPI00018120	DAP3	Mitochondrial 28S ribosomal protein S29	2					3		1		0.917792	4					2					Cytoplasm	0	0.001
IPI00018136	VCAM1	Splice Isoform 1 of Vascular cell adhesion protein 1 precursor																	2		5.95675		Plasma Membrane	1	0.988	Yes
IPI00018140	SYNCRIP	Splice Isoform 1 of Heterogeneous nuclear ribonucleoprotein Q	44	5		0.380878		57	4	10	0.360437	0.477788	50	5	10	0.747586	0.514604	30	3	7	0.272101	0.356935	Nucleus	0	0
IPI00018146	YWHAQ	14-3-3 protein theta	207	34	21	0.532445	0.57559	108	25	15	1.15054	0.376766	90	9	6	0.745367	0.177438	17	10	36	1.43243	2.93126	Cytoplasm	0	0	Yes
IPI00018188	NECAP2	Splice Isoform 1 of Adaptin ear-binding coat-associated protein 2	2					1										3					Cytoplasm	0	0
IPI00018192	WDR74	Splice Isoform 1 of WD-repeat protein 74						2										1					Nucleus	0	0.017
IPI00018195	MAPK3	Mitogen-activated protein kinase 3	22	13		1.86794		4					13						1		3.47837		Cytoplasm	0	0.002	Yes
IPI00018196	NLE1	Notchless homolog 1	2																				Nucleus	0	0	Yes
IPI00018206	GOT2	Aspartate aminotransferase, mitochondrial precursor	36	18	7	1.59736	1.0966	22		7		0.856443	37		5		0.358484	6	2	2	0.850964	0.553672	Extracellular Space	0	0.994
IPI00018213	LRRC8D	Leucine-rich repeat-containing protein 5 precursor	1																				Plasma Membrane	3	0.008
IPI00018214	MAX	Splice Isoform 1 of Max protein						2					2					12	1		0.267567		Nucleus	0	0
IPI00018219	TGFBI	Transforming growth factor-beta-induced protein ig-h3 precursor							32	5	160.243	14.3558							6	4	15.8702	6.75141	Plasma Membrane	1	1	Yes
IPI00018229	PLDN	Splice Isoform 1 of Pallidin	1					1															Cytoplasm	0	0
IPI00018235	PEF1	Peflin	3		1		1.66336	2										2					Cytoplasm	0	0.001
IPI00018236	GM2A	Ganglioside GM2 activator precursor	5	2		1.24263		5	10		8.46056		1	1		4.21269		4					Extracellular Space	0	1	Yes
IPI00018246	HK1	Splice Isoform 1 of Hexokinase-1	15	6	3	1.27296	1.12252	6		22		8.53796	13		6		1.15335	5	6	10	2.64504	2.56309	Cytoplasm	0	0.003	Yes
IPI00018251	NCOA2	Nuclear receptor coactivator 2	1																				Nucleus	0	0
IPI00018260	ARMC1	Hypothetical protein FLJ10511	4					2															Unknown	0	0	Yes
IPI00018272	PNPO	Pyridoxine-5'-phosphate oxidase	20					14	1	2	0.398423	0.422823	5					4	1		0.695675		Unknown	0	0.092
IPI00018274	EGFR	Splice Isoform 1 of Epidermal growth factor receptor precursor	58	18	21	1.00173	2.0292	16	3	12	0.937001	1.94435	11		29		6.18416	5	4	17	1.81892	4.24059	Plasma Membrane	2	1	Yes
IPI00018278	H2AFV	Histone H2A.F/Z variant		4	10	13.9116	57.5346		4	7	20.9054	19.6982	16										Nucleus	0	0.031	Yes
IPI00018279	COL5A3	Collagen alpha 3(V) chain precursor																		1		2.43785	Extracellular Space	0	1	Yes
IPI00018282	CD40	Splice Isoform I of Tumor necrosis factor receptor superfamily member 5 precursor								1		3.67117											Plasma Membrane	1	0.999
IPI00018288	POLR2C	DNA-directed RNA polymerase II 33 kDa polypeptide	4										1					2					Nucleus	0	0
IPI00018300	IFIT1	Interferon-induced protein with tetratricopeptide repeats 1						3															Cytoplasm	0	0
IPI00018305	IGFBP3	Insulin-like growth factor binding protein 3 precursor		37		120.432			3		15.929			4		30.7015		6	14	4	5.0996	0.964488	Extracellular Space	0	0.999	Yes
IPI00018331	SNAPAP	SNARE-associated protein Snapin						2					2										Cytoplasm	0	0.261
IPI00018342	AK1	Adenylate kinase isoenzyme 1	28	2		0.257097		5					13	1		0.601812		5					Cytoplasm	0	0.013	Yes
IPI00018349	MCM4	DNA replication licensing factor MCM4	22	4		0.604852		33					26		2		0.224036	3					Nucleus	0	0
IPI00018350	MCM5	DNA replication licensing factor MCM5						11	2	8	0.912723	1.86411	10					1					Nucleus	0	0
IPI00018352	UCHL1	Ubiquitin carboxyl-terminal hydrolase isozyme L1	151	14	8	0.303885	0.304129	119	27		1.12801		114	9	5	0.589812	0.118456	2	2		1.98558		Cytoplasm	0	0.003	Yes
IPI00018364	RAP2B	Ras-related protein Rap-2b	6	1		0.603986				2		6.34234	4		2		1.20979			8		12.5028	Plasma Membrane	0	0.097
IPI00018370	SVIL	Splice Isoform 2 of Supervillin													1		3.52448	12		9		1.07236	Plasma Membrane	0	0	Yes
IPI00018398	PSMC3	26S protease regulatory subunit 6A	34	2		0.213023		51		12		0.635654	27					7	3	1	1.05439	0.304732	Nucleus	0	0	Yes
IPI00018402	TBCE	Beta-tubulin cofactor E	18					10					9										Unknown	0	0	Yes
IPI00018411	ZNF629	PREDICTED: zinc finger protein 629																2					Unknown	0	0	Yes
IPI00018415	TM9SF2	Transmembrane 9 superfamily protein member 2 precursor	3	4	1	3.4779	1.66336	3					1		2		3.02448	1	5	10	6.69593	7.68927	Plasma Membrane	9	0.997	Yes
IPI00018434	TSG101	Splice Isoform 1 of Tumor susceptibility gene 101 protein	9					4					8					1					Nucleus	0	0
IPI00018451	CIB1	Calcium and integrin-binding protein 1	2					1															Nucleus	0	0
IPI00018452	CPNE1	Copine-1	41	10	16	0.792357	2.17751	8	1	8	0.664038	2.48548	17		15		2.15929	12					Unknown	0	0.081
IPI00018465	CCT7	T-complex protein 1, eta subunit	104	26	24	0.808813	1.30174	58	5	4	0.438673	0.198045	137	2	32	0.11486	0.592633	5	6	2	2.64504	0.645951	Cytoplasm	0	0.002
IPI00018522	PRMT1	Splice Isoform 1 of Protein arginine N-methyltransferase 1	63	17	17	0.873036	1.51733	8		8		2.48548	13		5		0.973029	24	11	15	1.13048	0.902712	Nucleus	0	0.005	Yes
IPI00018534	HIST1H2BL	Histone H2B.c		24	50	78.4696	283.673	138	17	46	0.615811	0.891178			32		81.7834	103	24	32	0.581548	0.452032	Nucleus	0	0	Yes
IPI00018583	HABP4	Hyaluronan binding protein 4											1										Cytoplasm	0	0.827
IPI00018597	SYK	Splice Isoform Long of Tyrosine-protein kinase SYK	4	1		0.84558																	Cytoplasm	0	0	Yes
IPI00018627	NAT13	Hypothetical protein FLJ13194	17										9		1		0.352448						Unknown	0	0
IPI00018671	DUSP3	Dual specificity protein phosphatase 3	6		1		0.950494						6					1					Cytoplasm	0	0	Yes
IPI00018691	MRPS18A	28S ribosomal protein S18a, mitochondrial precursor											3										Cytoplasm	0	0.904
IPI00018726	KLHL11	Hypothetical protein FLJ10572																1					Extracellular Space	0	1
IPI00018768	TSN	Translin	28	9	2	1.03624	0.424377	19		9		1.25203	6		6		2.3067			2		3.87571	Nucleus	0	0.005	Yes
IPI00018769	THBS2	Thrombospondin-2 precursor																	4		10.9135		Extracellular Space	0	1	Yes
IPI00018780	CDK5RAP3	Splice Isoform 2 of CDK5 regulatory subunit-associated protein 3											2							2		3.87571	Unknown	0	0.162
IPI00018783	ITPA	Inosine triphosphate pyrophosphatase	10					8		2		0.704704	11	1		0.702114		2					Cytoplasm	0	0.002
IPI00018798	DNAJC17	Hypothetical protein FLJ10634						2					2										Unknown	0	0.002
IPI00018801	C1orf78	Hypothetical protein FLJ10647						4	1		1.19527									2		3.87571	Plasma Membrane	1	0
IPI00018804	TRIP10	Cdc42-interacting protein 4	10	2		0.6778		5					4										Cytoplasm	0	0
IPI00018813	COPS2	Splice Isoform 1 of COP9 signalosome complex subunit 2	21	5		0.779068		5					4										Cytoplasm	0	0
IPI00018840	TRIP4	Activating signal cointegrator 1						1					1										Nucleus	0	0.012
IPI00018842	HMGN3	High mobility group nucleosome binding domain 3											3										Nucleus	0	0
IPI00018855	ATP6V0C	Vacuolar ATP synthase 16 kDa proteolipid subunit																		3		5.31356	Plasma Membrane	4	0.701
IPI00018871	ARL8B	Hypothetical protein FLJ10702	1	2		3.7279		5										1	2		2.97837		Plasma Membrane	0	0.001
IPI00018873	PBEF1	Splice Isoform 1 of Nicotinamide phosphoribosyltransferase	5	3		1.78062		56	9	10	0.803281	0.48617	13	3	4	1.66258	0.792709	2	3		2.81171		Extracellular Space	0	0	Yes
IPI00018879	IDUA	Alpha-L-iduronidase precursor	2					1	2	2	5.47634	3.17117											Extracellular Space	0	1	Yes
IPI00018880	TNFRSF1A	Tumor necrosis factor receptor superfamily member 1A precursor																	1		3.47837		Plasma Membrane	2	0.975
IPI00018909	TFF3	Trefoil facTor 3 precursor	1																				Extracellular Space	0	0	Yes
IPI00018915	G0S2	Putative lymphocyte G0/G1 switch protein 2												2		15.8507							Plasma Membrane	1	0.15	Yes
IPI00018924	HMG20A	High-mobility group 20A variant	2																				Nucleus	0	0.036	Yes
IPI00018929	LRRC20	Splice Isoform 3 of Leucine-rich repeat-containing protein 20	1																				Unknown	0	0
IPI00018931	VPS35	Vacuolar protein sorting 35	5	1		0.70465		12		6		1.30977	16	1	3	0.49561	0.50432	3	5	3	3.34797	1.32839	Cytoplasm	0	0
IPI00018953	DPP4	Dipeptidyl peptidase 4																9	6	10	1.58702	1.53785	Plasma Membrane	1	0.622	Yes
IPI00018963	PARVA	Splice Isoform 1 of Alpha-parvin	6					4		2		1.26847			1		3.52448			1		2.43785	Cytoplasm	0	0	Yes
IPI00018968	APPBP1	NEDD8-activating enzyme E1 regulatory subunit	4	3	2	2.13674	2.46138	5					3		4		2.77448	1					Cytoplasm	0	0
IPI00018971	TRIM21	52 kDa Ro protein																2					Nucleus	0	0.011	Yes
IPI00019004	TLOC1	Translocation protein-1	12	2		0.573523			1		5.97634		16		2		0.355821			4		6.75141	Plasma Membrane	2	0
IPI00019006	TLR2	Toll-like receptor 2 precursor																		2		3.87571	Plasma Membrane	1	0.936	Yes
IPI00019018	TM7SF2	Delta(14)-sterol reductase																		3		5.31356	Plasma Membrane	7	0.997
IPI00019022	ABCB8	Splice Isoform Long of ATP-binding cassette sub-family B member 8, mitochondrial precursor																		3		5.31356	Plasma Membrane	3	0.001	Yes
IPI00019025	PARD6B	Partitioning defective 6 homolog beta	13															2					Plasma Membrane	0	0.002
IPI00019038	LYZ	Lysozyme C precursor		1		4.2279									2		6.04896	18	17		2.27012		Extracellular Space	0	1	Yes
IPI00019046	RBM22	Hypothetical protein FLJ10290	3					1		3		4.50675	2					1					Nucleus	0	0
IPI00019056	RNF19	RING finger protein 19											1										Plasma Membrane	2	0	Yes
IPI00019068	LENG4	BB1 protein	7	7	2	2.94941	1.53836			1		3.67117	7		6		2.01836	2	2	8	1.98558	4.16761	Plasma Membrane	3	0.015
IPI00019088	COL9A2	Collagen alpha 2(IX) chain precursor	1					5															Extracellular Space	0	0.998	Yes
IPI00019141	AGPAT1	1-acyl-sn-glycerol-3-phosphate acyltransferase alpha						2							2		6.04896			1		2.43785	Plasma Membrane	3	0.994
IPI00019146	CXADR	Splice Isoform 1 of Coxsackievirus and adenovirus receptor precursor	29	3	29	0.356123	5.49834	1												3		5.31356	Plasma Membrane	1	1	Yes
IPI00019148	IGBP1	Immunoglobulin-binding protein 1	2					6	1		0.853763		5		2		1.00816						Cytoplasm	0	0
IPI00019158	ADAM8	A disintegringrin and metalloproteinase domain 8							2		10.9527												Plasma Membrane	1	0.999	Yes
IPI00019169	SH3GL1	SH3GL1 protein	7	1		0.528487		3					3					1					Cytoplasm	0	0
IPI00019171	SH3GL2	SH3-containing GRB2-like protein 2						2															Plasma Membrane	0	0
IPI00019176	RARRES2	Retinoic acid receptor responder protein 2 precursor		7		23.5953			29	3	145.314	9.01351							5		13.3919		Extracellular Space	0	0.999	Yes
IPI00019178	PSPH	Phosphoserine phosphatase	5	4		2.3186		3	1		1.49408		1										Unknown	0	0.001
IPI00019196	RPP30	Ribonuclease P protein subunit p30	1					1					3										Nucleus	0	0
IPI00019205	C14orf4	Protein C14orf4	28	2		0.257097							6					5					Nucleus	0	0.001
IPI00019242	MMP15	Matrix metalloproteinase-15 precursor		1	2	4.2279	12.3069																Plasma Membrane	1	0.632
IPI00019248	TRAF3IP3	TRAF3-interacting JNK-activating modulator																1		2		1.93785	Unknown	0	0
IPI00019254	SLC35A2	Splice Isoform UGT2 of UDP-galactose translocator																	1	3	3.47837	5.31356	Plasma Membrane	8	0.811
IPI00019269	WDR61	REC14 protein	5	2		1.24263		12					2					4					Unknown	0	0
IPI00019276	UBXD1	Splice Isoform 1 of UBX domain-containing protein 1											4										Cytoplasm	0	0
IPI00019318	PRR3	Proline-rich Protein 3											1										Unknown	0	0.001	Yes
IPI00019326	FDX1	Adrenodoxin, mitochondrial precursor																6	1		0.49691		Cytoplasm	0	0.863
IPI00019329	DYNLL1	Dynein light chain 1, cytoplasmic	41	6	2	0.484938	0.293022	8	3	2	1.76989	0.704704	6	1	1	1.20362	0.503497	7	1		0.434797		Cytoplasm	0	0	Yes
IPI00019335	AARSD1	Hypothetical protein MGC2744		1		4.2279																	Unknown	0	0
IPI00019345	RAP1A	Ras-related protein Rap-1A	23		2		0.512788	11		3		0.751126			3		8.57344						Cytoplasm	0	0.196
IPI00019350	STEAP3	Dudulin 2, isoform b													3		8.57344						Plasma Membrane	5	0.004
IPI00019353	AGK	Multi-substrate lipid kinase variant						3		1		0.917792	2		1		1.17483						Cytoplasm	0	0.935
IPI00019355	TSC22D1	TSC22 domain family protein 1	3					2															Nucleus	0	0.079
IPI00019359	KRT9	Keratin, type I cytoskeletal 9	29	119	29	12.8373	5.49834	22	6	33	1.34165	3.87603	23	4	73	1.27923	7.7203	90	83	611	2.27148	9.66515	Cytoplasm	0	0.005	Yes
IPI00019372	SRGN	Secretory granule proteoglycan core protein precursor							17	2	85.5977	6.34234	1	14	5	52.4776	6.8112	4	21	8	10.6092	2.50057	Extracellular Space	0	1	Yes
IPI00019376	39336	Septin-11	30					11	1	1	0.498028	0.305931	20		4		0.528473						Nucleus	0	0
IPI00019380	NCBP1	80 kDa nuclear cap binding protein	12					1															Nucleus	0	0
IPI00019381	TMEM30A	Hypothetical protein FLJ10856	7					2					6		2		0.864138	2		4		2.25047	Plasma Membrane	2	0
IPI00019383	GALK1	Galactokinase	5	2		1.24263							1										Cytoplasm	0	0.005
IPI00019385	SSR4	Translocon-associated protein delta subunit precursor	13		8		3.30198	5		7		3.28303	12		4		0.853687	8		11		1.86849	Extracellular Space	0	1	Yes
IPI00019399	SAA4	Serum amyloid A-4 protein precursor													33		84.3079						Extracellular Space	0	0.993	Yes
IPI00019400	TPMT	Thiopurine S-methyltransferase	4	2		1.49116				2		6.34234											Cytoplasm	0	0
IPI00019407	NSDHL	Sterol-4-alpha-carboxylate 3-dehydrogenase, decarboxylating	21	8		1.21924		29		2		0.211411	4		3		1.71469	2	2	2	1.98558	1.2919	Plasma Membrane	1	0	Yes
IPI00019426	CCL3	Small inducible cytokine A3 precursor																	3		8.43512		Extracellular Space	0	1
IPI00019427	EXOC1	Sec3-like, isoform 1						2															Cytoplasm	0	0
IPI00019432	NAB2	Splice Isoform 1 of NGFI-A binding protein 2	1																				Nucleus	0	0
IPI00019439	FBN2	Fibrillin 2 precursor		21		68.7859			3		15.929			8	3	60.403	8.57344	1	1	1	1.73919	1.21893	Plasma Membrane	1	0.985	Yes
IPI00019448	TSGA14	Splice Isoform 1 of Centrosomal protein of 41 kDa	7					2					7										Cytoplasm	0	0
IPI00019449	RNASE2	Nonsecretory ribonuclease precursor																19	17		2.15662		Extracellular Space	0	0.994	Yes
IPI00019450	TROVE2	Splice Isoform Long of 60-kDa SS-A/Ro ribonucleoprotein											11					1					Nucleus	0	0
IPI00019451	C20orf20	MRG-binding protein	4					1							3		8.57344						Nucleus	0	0
IPI00019459	MAP3K7IP1	Mitogen-activated protein kinase kinase kinase 7-interacting protein 1	1					5															Cytoplasm	0	0.003
IPI00019463	EIF2AK2	Interferon-induced, double-stranded RNA-activated protein kinase	3					2		2		2.11411	8					4					Cytoplasm	0	0	Yes
IPI00019471	IRS1	Insulin receptor substrate 1											4										Cytoplasm	0	0
IPI00019472	SLC1A5	Neutral amino acid transporter B(0)	1							11		30.3829	1		4		5.54896	1	2	15	2.97837	11.2839	Plasma Membrane	9	0.001
IPI00019485	ECHDC2	Hypothetical protein FLJ10948	1																				Unknown	0	0.552
IPI00019487	NUDT15	Probable 7,8-dihydro-8-oxoguanine triphosphatase NUDT15	3																				Unknown	0	0.153
IPI00019488	IMP3	U3 small nucleolar ribonucleoprotein protein IMP3	1																				Cytoplasm	0	0
IPI00019495	DYNLT1	Cytoplasmic dynein light chain	15	7		1.47471		5					4										Cytoplasm	0	0
IPI00019501	EFNB3	Ephrin-B3 precursor	1	11		18.2534																	Plasma Membrane	2	0.989
IPI00019502	MYH9	Myosin-9	780	169	48	0.699763	0.34874	565	79	128	0.696344	0.605847	622	27	100	0.323411	0.406819	314	98	95	0.774224	0.436813	Cytoplasm	0	0	Yes
IPI00019505	COX8A	Cytochrome c oxidase polypeptide VIII-liver/heart, mitochondrial precursor	6					3					2										Plasma Membrane	1	0.037
IPI00019530	TIE1	Tyrosine-protein kinase receptor Tie-1 precursor												5		38.1269							Plasma Membrane	1	1	Yes
IPI00019540	SAPS3	Sporulation-induced transcript 4-associated protein SAPLa	4	1		0.84558		3		1		0.917792	1		2		3.02448		3	1	8.43512	2.43785	Unknown	0	0	Yes
IPI00019560	C6orf64	Splice Isoform 1 of Protein C6orf64						1												1		2.43785	Plasma Membrane	1	0.084
IPI00019563	GIMAP4	GTPase, IMAP family member 4																3		4		1.68785	Unknown	0	0.001	Yes
IPI00019568	F2	Prothrombin precursor		2	2	7.4558	12.3069		1		5.97634			3	16	23.2761	41.3917	5					Extracellular Space	0	1	Yes
IPI00019576	F10	Coagulation factor X precursor													1		3.52448						Plasma Membrane	1	0.979	Yes
IPI00019580	PLG	Plasminogen precursor		10	1	33.279	6.65346		6	10	30.858	27.7117		10	29	75.2537	74.21	46	17	18	0.917709	0.571944	Extracellular Space	0	1	Yes
IPI00019581	F12	Coagulation factor XII precursor													1		3.52448						Extracellular Space	0	1	Yes
IPI00019590	PLAT	Splice Isoform 1 of Tissue-type plasminogen activator precursor							3		15.929		16	148	152	64.7032	22.6307	1	3		4.21756		Extracellular Space	0	0.913
IPI00019591	CFB	Splice Isoform 1 of Complement factor B precursor		9		30.0511			23	1	115.456	3.67117						8	76	22	21.0396	3.62586	Extracellular Space	0	0.993	Yes
IPI00019599	UBE2V1	Splice Isoform 1 of Ubiquitin-conjugating enzyme E2 variant 1	61	7		0.380569			3		15.929		4	1		1.68507		1					Unknown	0	0.011
IPI00019600	UBE2V2	Ubiquitin-conjugating enzyme E2 variant 2	67	8		0.394459		32	3		0.482697		5	1		1.40423							Cytoplasm	0	0
IPI00019640	VRK1	Serine/threonine-protein kinase VRK1	13	2		0.532557		1					2					1					Nucleus	0	0
IPI00019642	CLIP2	Splice Isoform 1 of Cytoplasmic linker protein 2	5					3					6					6					Cytoplasm	0	0.124
IPI00019690	DIP	DJ439F8.1 protein																1		5		4.09463	Plasma Membrane	2	0
IPI00019733	RAE1	mRNA-associated protein mrnp 41	19		20		5.70346						14		2		0.403264	8					Nucleus	0	0.166
IPI00019755	GSTO1	Glutathione transferase omega 1	20	6		0.969876		19	4		1.04527		29	4	4	1.02338	0.369931	1	1		1.73919		Cytoplasm	0	0	Yes
IPI00019770	FAU	Ubiquitin-like protein FUBI								7		19.6982	5										Cytoplasm	0	0.001
IPI00019771	CX3CL1	Fractalkine precursor		1		4.2279													5		13.3919		Plasma Membrane	1	0.988	Yes
IPI00019812	PPP5C	Serine/threonine protein phosphatase 5	3					5		1		0.611862	5										Nucleus	0	0
IPI00019848	HCFC1	Splice Isoform 1 of Host cell factor	14	4		0.92744		4					9		1		0.352448	11					Nucleus	0	0.105	Yes
IPI00019869	S100A2	S100 calcium-binding protein A2	7	2		0.931975																	Cytoplasm	0	0.213	Yes
IPI00019870	CAV2	Caveolin-2	1	2		3.7279																	Plasma Membrane	1	0	Yes
IPI00019872	HSD17B2	Estradiol 17-beta-dehydrogenase 2						2															Plasma Membrane	2	0.011	Yes
IPI00019880	SERPINH1	47 kDa heat shock protein precursor	278	23	30	0.269683	0.611483	107	8	39	0.377877	0.973848	30		13		1.09091	51	5	24	0.257536	0.682856	Extracellular Space	0	1
IPI00019884	ACTN2	Alpha-actinin 2																	20		50.5675		Nucleus	0	0	Yes
IPI00019888	ALDH5A1	Succinate semialdehyde dehydrogenase, mitochondrial precursor	9	1	1	0.42279	0.665346	1										9	1		0.347837		Cytoplasm	0	0.531
IPI00019898	SOAT1	Sterol O-acyltransferase 1	1	4		6.9558							4		2		1.20979	2					Plasma Membrane	8	0
IPI00019899	SC4MOL	C-4 methylsterol oxidase	2	2		2.48527		3					3		2		1.51224	1		2		1.93785	Plasma Membrane	3	0.257	Yes
IPI00019901	ADD1	Splice Isoform 1 of Alpha-adducin	31	2		0.232994		9					5					2					Cytoplasm	0	0.002	Yes
IPI00019903	CCDC44	UPF0082 protein PRO0477	7					2					7					3					Extracellular Space	0	0.991
IPI00019906	BSG	Splice Isoform 2 of Basigin precursor	64	37	45	1.8528	3.92932	55	8	19	0.728763	0.924147	8	1	10	0.936153	2.91609	40	26	18	1.59604	0.655643	Plasma Membrane	2	1	Yes
IPI00019912	HSD17B4	Peroxisomal multifunctional enzyme type 2	84	23	14	0.885196	0.942923	68		17		0.672607	8		4		1.2331	41	3	19	0.200836	0.674267	Cytoplasm	0	0.905	Yes
IPI00019918	DDX19A	ATP-dependent RNA helicase DDX19A		2		7.4558							9		1		0.352448	1					Nucleus	0	0.001
IPI00019924	TBCC	Tubulin-specific chaperone C	1															2					Cytoplasm	0	0.009	Yes
IPI00019926	ADRBK2	Beta-adrenergic receptor kinase 2	2																				Cytoplasm	0	0.005
IPI00019927	PSMD7	26S proteasome non-ATPase regulatory subunit 7	22	3	1	0.464509	0.289281	13					15										Cytoplasm	0	0.006	Yes
IPI00019930	UBE2D1	Ubiquitin-conjugating enzyme E2 D1	5										4										Cytoplasm	0	0
IPI00019932	UBE2D2	Ubiquitin-conjugating enzyme	8						1		5.97634		6					1					Cytoplasm	0	0.001
IPI00019943	AFM	Afamin precursor																2					Extracellular Space	0	1	Yes
IPI00019954	CST6	Cystatin M precursor						1	34		85.0977								2		5.95675		Extracellular Space	0	0.998	Yes
IPI00019962	FLJ11184	Hypothetical protein FLJ11184	1										1		3		4.28672						Unknown	0	0
IPI00019966	C5orf22	Hypothetical protein FLJ11193	2	1	1	1.4093	2.21782						2										Unknown	0	0
IPI00019971	STXBP2	Syntaxin-binding protein 2	3					10										6					Unknown	0	0.001	Yes
IPI00019977	GTF2E1	Transcription initiation factor IIE alpha subunit	10	4		1.26469							3					1					Nucleus	0	0
IPI00019981	GTF2E2	Transcription initiation factor IIE beta subunit	4					2					1										Nucleus	0	0	Yes
IPI00019983	BCL2L1	Splice Isoform Bcl-X(L) of Apoptosis regulator Bcl-X		1		4.2279		1												5		8.18927	Plasma Membrane	1	0
IPI00019987	SUOX	Sulfite oxidaSe																4					Cytoplasm	0	0.044
IPI00019988	SGSH	N-sulphoglucosamine sulphohydrolase precursor	1					1	7		17.9172							2					Extracellular Space	0	1
IPI00019994	CXorf15	Gamma-taxilin						2					2										Nucleus	0	0
IPI00019996	SLTM	Modulator of estrogen induced transcription isoforM b											2					7					Extracellular Space	0	0.971	Yes
IPI00019997	LIN7C	LIN-7 homolog C	13	1		0.301993		2					2					3					Cytoplasm	0	0
IPI00020002	CNO	Cappuccino protein homolog	3					1					2										Cytoplasm	0	0.002
IPI00020008	NEDD8	NEDD8 precursor	35	11		1.01408		24	2	1	0.438107	0.146847	5	2		2.64179		2	2		1.98558		Nucleus	0	0	Yes
IPI00020012	APLP1	Amyloid-like protein 1 precursor							1		5.97634												Plasma Membrane	1	1	Yes
IPI00020017	C10orf116	Adipose most abundant gene transcript 2						11															Unknown	0	0.002	Yes
IPI00020021	DEK	Protein DEK	19	3		0.534185		15	4		1.30658		15	1		0.526586		16	4		0.64197		Nucleus	0	0	Yes
IPI00020030	SLC39A9	Solute carrier family 39 (Zinc transporter), member 9	2	1		1.4093									1		3.52448						Plasma Membrane	7	0.469
IPI00020031	EN2	Homeobox protein engrailed-2											1					1		1		1.21893	Nucleus	0	0	Yes
IPI00020042	PSMC4	Splice Isoform 1 of 26S protease regulatory subunit 6B	38	7		0.605008		32		3		0.273137	16					4					Nucleus	0	0
IPI00020075	ABHD10	Hypothetical protein FLJ11342	21	3		0.485623		10					4					7	1	1	0.434797	0.304732	Extracellular Space	0	0.998
IPI00020091	ORM2	Alpha-1-acid glycoprotein 2 precursor											1		19		24.4826	1	2		2.97837		Extracellular Space	0	1	Yes
IPI00020096	KLC1	Splice Isoform A of Kinesin light chain 1	9					7					12					1					Cytoplasm	0	0
IPI00020101	HIST1H2BC	Histone H2B.a/g/h/k/l		24	50	78.4696	283.673	138	17	46	0.615811	0.891178			32		81.7834	103	24	32	0.581548	0.452032	Unknown	0	0	Yes
IPI00020124	PI4KII	Phosphatidylinositol 4-kinase type II																2					Cytoplasm	0	0
IPI00020127	RPA1	Replication protein A 70 kDa DNA-binding subunit	8	2		0.828422		2					1					6	1		0.49691		Nucleus	0	0.001
IPI00020153	BSN	Bassoon protein	1										1										Plasma Membrane	0	0
IPI00020164	PTP4A1	Protein tyrosine phosphatase type IVA protein 1	5					4															Nucleus	0	0
IPI00020178	STAM	Signal tranSducing adaptor molecule 1	1					6					2										Cytoplasm	0	0
IPI00020191	PTP4A2	Splice Isoform 1 of Protein tyrosine phosphatase type IVA protein 2	9																				Plasma Membrane	0	0
IPI00020194	TAF15	Splice Isoform Short of TATA-binding protein associated factor 2N						2					17					15	2	2	0.372297	0.242232	Nucleus	0	0
IPI00020210	DYSF	Dysferlin																3		16		6.00141	Plasma Membrane	1	0	Yes
IPI00020226	ACOX3	Acyl-coenzyme A oxidase 3, peroxisomal																3	1	9	0.869593	3.48517	Cytoplasm	0	0
IPI00020301	C7orf24	C7orf24 protein	12	2		0.573523		35	5	1	0.718936	0.101977											Unknown	0	0	Yes
IPI00020319	BLOC1S1	Biogenesis of lysosome-related organelles complex-1, subunit 1	1										1										Cytoplasm	0	0.001
IPI00020355	CCL20	Splice Isoform 1 of Small inducible cytokine A20 precursor																	1		3.47837		Extracellular Space	0	0.999
IPI00020364	CRADD	Death domain-containing protein CRADD	3																				Cytoplasm	0	0.002
IPI00020407	MGAT5	Alpha-1,6-mannosylglycoprotein 6-beta-N-acetylglucosaminyltransferase V												1		8.42537							Plasma Membrane	1	0.392	Yes
IPI00020416	TPP2	Tripeptidyl-peptidase 2											4							1		2.43785	Cytoplasm	0	0
IPI00020418	RRAS	Ras-related protein R-Ras											1										Cytoplasm	0	0.001
IPI00020430	ATP6AP1	Similar to ATPase, H+ transporting, lysosomal interacting protein 1 precursor; H-ATPase subunit; V-ATPase S1 accessory protein; ATPase, H+ transporting, lysosomal (vacuolar proton pump), subunit 1						2	6	3	10.286	3.0045		5		38.1269		2	1	7	1.15946	3.68833	Plasma Membrane	2	1	Yes
IPI00020436	RAB11B	Ras-related protein Rab-11B	39	3	2	0.267092	0.307673	17		4		0.649149	11					4	1	9	0.695675	2.78814	Cytoplasm	0	0
IPI00020454	DCK	Deoxycytidine kinase		2		7.4558																	Nucleus	0	0.001
IPI00020468	SELS	Selenoprotein S																		4		6.75141	Plasma Membrane	1	0
IPI00020472	TMEM111	HypotHetical protein LOC55831	1																	2		3.87571	Plasma Membrane	2	0.001	Yes
IPI00020495	MRPS36	Mitochondrial 28S ribosomal protein S36	14					15					9					29					Cytoplasm	0	0.004
IPI00020501	MYH11	Myosin-11						57															Cytoplasm	0	0	Yes
IPI00020504	CLCN2	Splice Isoform 1 of Chloride channel protein 2																		1		2.43785	Plasma Membrane	12	0
IPI00020508	TRMT1	Probable N(2),N(2)-dimethylguanosine tRNA methyltransferase													1		3.52448						Unknown	0	0.811
IPI00020510	ZCD1	Protein C10orf70	7	2		0.931975		9					2					6					Plasma Membrane	1	0.584
IPI00020513	ZYX	Zyxin	43	2		0.16945		8	4		2.32282		46	1		0.179263		12	3		0.648855		Unknown	0	0.938	Yes
IPI00020515	MDS032	Splice Isoform 1 of USE1-like protein											3							2		3.87571	Plasma Membrane	1	0.297	Yes
IPI00020524	CLCN7	Putative chloride channel protein 7																		1		2.43785	Plasma Membrane	11	0
IPI00020530	THEM2	Thioesterase superfamily member 2	3					4					1										Unknown	0	0.004	Yes
IPI00020546	ASH1L	Ash1	1		7		20.2871			12		33.054	1		5		6.8112		1		3.47837		Nucleus	0	0.004	Yes
IPI00020557	LRP1	Low-density lipoprotein receptor-related protein 1 precursor											3		1		0.88112	34	7	26	0.524246	1.09669	Plasma Membrane	1	1	Yes
IPI00020567	ARHGAP1	Rho-GTPase-activating protein 1	31	4	1	0.434737	0.207921	7		1		0.458896	14	1		0.561692		6	2		0.850964		Cytoplasm	0	0	Yes
IPI00020599	CALR	Calreticulin precursor	366	68	8	0.60081	0.125961	241	63	22	1.29963	0.246966	184	5	18	0.206091	0.251031	428	11	13	0.065879	0.0459023	Extracellular Space	0	1	Yes
IPI00020601	SLAIN2	KIAA1458 protein											1										Unknown	0	0
IPI00020602	CSNK2A2	Casein kinase II, alpha' chain	10	1		0.384355		19					7										Cytoplasm	0	0	Yes
IPI00020632	ASS1	Argininosuccinate synthase	203	57	26	0.906815	0.725441	37	3	14	0.419185	1.01043						2	5		4.46395		Cytoplasm	0	0.421	Yes
IPI00020672	BBS1	Dipeptidyl-peptidase III (EC 3.4.14.4) (DPP III) (Dipeptidyl aminopeptidase III) (Dipeptidyl arylamidase III). Splice isoform 2	80	26	26	1.04846	1.82704	53	14	13	1.30868	0.661578	7		2		0.75612	13	8	2	1.48764	0.276836	Unknown	0	0
IPI00020701	PRNPIP	Prion protein interacting protein	4																				Plasma Membrane	0	0.795
IPI00020719	VISA	Splice Isoform 1 of Mitochondrial antiviral signaling protein	4		1		1.33069						5	1		1.40423		11	2	1	0.496395	0.203154	Plasma Membrane	1	0
IPI00020728	SORBS2	Arg/Abl-interacting protein ArgBP2a								2		6.34234	2										Nucleus	0	0
IPI00020771	MAP7	E-MAP-115-95								3		9.01351											Cytoplasm	0	0
IPI00020827	MKKS	PNAS-117	2		1		2.21782	1		1		1.83558	1					2					Plasma Membrane	1	0.137
IPI00020850	PPP2R2B	Serine/threonine protein phosphatase 2A, 55 kDa regulatory subunit B, beta isoform						1		3		4.50675							1	3	3.47837	5.31356	Cytoplasm	0	0
IPI00020873	TBL1Y	F-box-like/WD-repeat protein TBL1Y								1		3.67117											Nucleus	0	0
IPI00020883	HIGD2A	HIG1 domain family member 2A											2										Plasma Membrane	2	0
IPI00020904	PRKX	Serine/threonine-protein kinase PRKX													1		3.52448						Cytoplasm	0	0.014
IPI00020906	IMPA1	Inositol monophosphatase	12										12		1		0.271114		1		3.47837		Cytoplasm	0	0.001
IPI00020915	MRFAP1	T-cell activation protein	2		1		2.21782	2										1					Nucleus	0	0
IPI00020928	TFAM	Transcription factor A, mitochondrial precursor	4	1		0.84558		5					7	1	6	1.05317	2.01836	3					Extracellular Space	0	0.986	Yes
IPI00020944	FDFT1	Squalene synthetase	16	4		0.818329		22	2	13	0.476203	1.55327	10		1		0.320407	1	2	9	2.97837	6.97034	Cytoplasm	0	0
IPI00020950	PPM1A	Protein phosphatase 2C alpha isoform		2		7.4558												1					Cytoplasm	0	0
IPI00020956	HDGF	Hepatoma-derived growth factor	30	69	3	7.21694	0.579367	26	12		2.24874		42	22		3.82228		33	11	3	0.831238	0.156281	Extracellular Space	0	0	Yes
IPI00020965	UBE2H	Ubiquitin-conjugating enzyme E2 H	1					3										1					Cytoplasm	0	0
IPI00020967	LILRB1	Splice Isoform 3 of Leukocyte immunoglobulin-like receptor subfamily B member 1 precursor																2		34		16.629	Plasma Membrane	1	0.998	Yes
IPI00020977	CTGF	Splice Isoform 1 of Connective tissue growth factor precursor		13		42.9627							33	233	183	50.9151	13.6171	3	2		1.48919		Extracellular Space	0	1	Yes
IPI00020982	ABP1	Splice Isoform 1 of Amiloride-sensitive amine oxidase [copper-containing] precursor																	6	3	15.8702	5.31356	Extracellular Space	0	1
IPI00020984	CANX	Calnexin precursor	199	33	17	0.537603	0.485544	110	3	31	0.143505	0.755011	114		18		0.403832	166	41	198	0.614451	1.71075	Plasma Membrane	1	0.999
IPI00020985	EP300	E1A-associated protein p300	1															1					Nucleus	0	0.016	Yes
IPI00020991	CDKN2AIP	Hypothetical protein FLJ20036	2															14					Nucleus	0	0
IPI00020996	IGFALS	Insulin-like growth factor-binding protein complex acid labile chain precursor													24		61.5876						Extracellular Space	0	0.999	Yes
IPI00021000	SPP1	Splice Isoform A of Osteopontin precursor																9	9		2.33054		Extracellular Space	0	1	Yes
IPI00021016	TSFM	Splice Isoform 1 of Elongation factor Ts, mitochondrial precursor	13					2					3					5					Cytoplasm	0	0.472
IPI00021033	COL3A1	Collagen alpha 1(III) chain precursor													1		3.52448		1	2	3.47837	3.87571	Extracellular Space	0	0.999	Yes
IPI00021034	COL4A1	Collagen alpha 1(IV) chain precursor	9	9		3.00511																	Extracellular Space	0	1
IPI00021048	FER1L3	Splice Isoform 1 of Myoferlin		32	8	104.293	46.2277	34		4		0.333848	368		152		1.0426	82	18	253	0.549527	4.3949	Plasma Membrane	1	0	Yes
IPI00021067	CXCL2	Macrophage inflammatory protein 2-alpha precursor												17		127.231			9		23.3054		Extracellular Space	0	1
IPI00021070	NCF2	Neutrophil cytosol factor 2																3	3		2.10878		Cytoplasm	0	0.183
IPI00021081	FST	Splice Isoform 1 of Follistatin precursor	3	40		32.529							3	7	69	13.2444	43.7973		8		20.827		Extracellular Space	0	0.998
IPI00021085	PGLYRP1	Peptidoglycan recognition protein precursor																11	9		1.94211		Extracellular Space	0	1	Yes
IPI00021088	KCNAB2	Splice Isoform 1 of Voltage-gated potassium channel beta-2 subunit											6							4		6.75141	Plasma Membrane	0	0
IPI00021129	AP3B1	Splice Isoform 1 of Adapter-related protein complex 3 beta 1 subunit											3		2		1.51224						Cytoplasm	0	0	Yes
IPI00021147	DEGS1	MLD	1	1		2.11395		9		2		0.634234						2	1	2	1.15946	1.2919	Plasma Membrane	6	0
IPI00021167	PRKRA	Protein activator of the interferon-induced protein kinase	3					10					5										Cytoplasm	0	0
IPI00021174	GGA3	Splice Isoform Long of ADP-ribosylation factor binding protein GGA3	2																				Cytoplasm	0	0
IPI00021175	CRKRS	Cell division cycle 2-related protein kinase 7	1																				Nucleus	0	0.001
IPI00021187	RUVBL1	RuvB-like 1	65	14	3	0.699857	0.272127	14					14		1		0.234965	9	3		0.843512		Nucleus	0	0	Yes
IPI00021257	ARFIP2	Arfaptin-2	25					5					9		1		0.352448						Cytoplasm	0	0
IPI00021258	ARFIP1	Splice Isoform B of Arfaptin-1	25	2		0.286762		12					7	1		1.05317		3	1	3	0.869593	1.32839	Unknown	0	0	Yes
IPI00021263	YWHAZ	14-3-3 protein zeta/delta	324	45	28	0.450017	0.490144	147	45	48	1.51983	0.873082	143	19	12	0.986681	0.217318	70	44	55	1.54998	1.12791	Cytoplasm	0	0	Yes
IPI00021266	hCG_16001	60S ribosomal protein L23a	10	3	7	0.971245	3.68857	8		18		5.45345	27	2	16	0.566098	1.47828	4		2		0.775141	Cytoplasm	0	0
IPI00021267	EPHA2	Ephrin type-A receptor 2 precursor											14		8		1.41306						Plasma Membrane	1	1	Yes
IPI00021275	EPHB2	Splice Isoform 1 of Ephrin type-B receptor 2 precursor								1		3.67117			7		18.6714		1	7	3.47837	11.065	Plasma Membrane	1	0.999
IPI00021277	NUBP1	Nucleotide-binding protein 1	6										2										Unknown	0	0
IPI00021290	ACLY	ATP-citrate synthase	99	45	30	1.46255	1.70604	49	5	59	0.517634	3.17198	100	2	49	0.156938	1.23465	1	1	4	1.73919	3.37571	Cytoplasm	0	0	Yes
IPI00021302	SUSD2	BK65A6.2	2		11		21.0627			8		22.3694											Plasma Membrane	1	1
IPI00021304	KRT2	Keratin, type II cytoskeletal 2 epidermal	20	64	74	9.88503	19.9693	29	6	156	1.0286	13.9234	10	3	43	2.11601	9.95934	147	73	438	1.2292	4.26203	Cytoplasm	0	0.008	Yes
IPI00021305	CCNH	Cyclin-H											1							1		2.43785	Nucleus	0	0
IPI00021320	MEPCE	Bin3, bicoid-interacting 3	6										2										Unknown	0	0
IPI00021326	SHC1	SHC (Src homology 2 domain containing) transforming protein 1						12					10					1					Cytoplasm	0	0
IPI00021327	GRB2	Splice Isoform 1 of Growth factor receptor-bound protein 2	24	2		0.298232		8					5					7		5		1.02366	Cytoplasm	0	0
IPI00021329	WDR45L	G-protein beta WD-40 repeat containing protein	2																				Unknown	0	0.003
IPI00021338	DLAT	Dihydrolipoyllysine-residue acetyltransferase component of pyruvate dehydrogenase complex, mitochondrial precursor	14	4	1	0.92744	0.443564	4					5					14	1	2	0.231892	0.25838	Cytoplasm	0	0.002	Yes
IPI00021347	UBE2L3	Ubiquitin-conjugating enzyme E2 L3	29	12	3	1.32449	0.598679	49	15	5	1.5129	0.287117	9	3	2	2.32761	0.604896	3	4		2.72837		Cytoplasm	0	0	Yes
IPI00021362	ZNF335	Zinc finger protein 335																1					Nucleus	0	0	Yes
IPI00021364	CFP	Properdin precursor																3	3		2.10878		Extracellular Space	0	1	Yes
IPI00021369	CRYAB	Alpha crystallin B chain	11	1		0.352325		18	1	2	0.314544	0.333807						1					Nucleus	0	0
IPI00021370	HIP2	Huntingtin interacting protein 2	11	5		1.42829		9	2		1.09527		11		1		0.293707						Cytoplasm	0	0
IPI00021389	CCS	Copper chaperone for superoxide dismutase	7					2					2										Cytoplasm	0	0.038	Yes
IPI00021399	FGFBP1	Heparin binding protein precursor	1					1	10		25.3817								3		8.43512		Extracellular Space	0	0.998
IPI00021405	LMNA	Splice Isoform A of Lamin A/C	141	40	25	0.91631		29	13	3	2.18975	0.30045	64	3	14	0.358094	0.559119	195	45	31	0.574116	0.232518	Nucleus	0	0.001	Yes
IPI00021408	NUDT4	Splice Isoform 2 of Diphosphoinositol polyphosphate phosphohydrolase 2	4										2										Unknown	0	0
IPI00021417	SART1	SART-1	1										19					16		1		0.143403	Nucleus	0	0.058	Yes
IPI00021428	ACTA1	Actin, alpha skeletal muscle			124		702.029		112		558.35												Cytoplasm	0	0	Yes
IPI00021434	PI3	Elafin precursor							3		15.929								4		10.9135		Plasma Membrane	1	0.981	Yes
IPI00021435	PSMC2	26S protease regulatory subunit 7	21	7		1.07251		37		1		0.0966097	18					6					Nucleus	0	0
IPI00021439	ACTB	Actin, cytoplasmic 1	1332	482	303	1.16793	1.28582	1368	224	319	0.814974	0.623158	1160	131	388	0.838694	0.84453	1279	543	491	1.05215	0.552333	Cytoplasm	0	0	Yes
IPI00021440	ACTG1	Actin, cytoplasmic 2	1332	482	303	1.16793	1.28582	1368	224	319	0.814974	0.623158	1160	131	388	0.838694	0.84453	1279	543	491	1.05215	0.552333	Cytoplasm	0	0	Yes
IPI00021447	AMY2B	Alpha-amylase 2B precursor		2		7.4558				1		3.67117											Extracellular Space	0	1	Yes
IPI00021448	PIK3R1	Phosphatidylinositol 3-kinase regulatory alpha subunit	6										1										Cytoplasm	0	0	Yes
IPI00021458	EHD3	EH-domain containing protein 3	11																				Cytoplasm	0	0
IPI00021466	PAIP1	Splice Isoform 1 of Polyadenylate-binding protein-interacting protein 1	20					4					2							1		2.43785	Cytoplasm	0	0
IPI00021493	TNKS	Splice Isoform 1 of Tankyrase 1																1	1		1.73919		Nucleus	0	0.015
IPI00021536	CALML5	Calmodulin-like protein 5																		4		6.75141	Cytoplasm	0	0	Yes
IPI00021537	OGFR	Splice Isoform 1 of Opioid growth factor receptor	23	3		0.445154		8	3		1.76989		12						1		3.47837		Plasma Membrane	0	0
IPI00021555	SERPINB7	Serpin B7													8		21.1959						Cytoplasm	0	0.035
IPI00021558	AQP3	Splice Isoform 1 of Aquaporin-3		1		4.2279																	Plasma Membrane	6	0.033
IPI00021569	MBTPS1	Membrane-bound transcription factor site-1 protease precursor		1		4.2279								3	3	23.2761	8.57344						Plasma Membrane	1	0.997
IPI00021576	SEPX1	Methionine-R-sulfoxide reductase																	1		3.47837		Unknown	0	0
IPI00021594	GPAA1	Anchor AttAchment protein 1																		2		3.87571	Plasma Membrane	7	0.018	Yes
IPI00021626	RBM42	Hypothetical protein MGC10433	3					3		1		0.917792	2					4					Unknown	0	0.053
IPI00021634	KLC2	Kinesin light chain 2	3					7					18										Cytoplasm	0	0
IPI00021637	C11orf73	HSPC179	3					1															Plasma Membrane	1	0.038
IPI00021685	ARL6	ADP-ribosylation factor-like protein 6	2																				Cytoplasm	0	0.002
IPI00021692	MBNL1	Splice Isoform EXP42 of Muscleblind-like protein	9							1		3.67117	2										Nucleus	0	0
IPI00021695	ATP2B1	Splice Isoform D of Plasma membrane calcium-transporting ATPase 1	27	15	5	1.76495	1.04526	5		5		2.39264			3		8.57344	13	6	71	1.13359	7.3634	Plasma Membrane	7	0
IPI00021700	PCNA	Proliferating cell nuclear antigen	67	18	13	0.86915	1.09551	63	9	12	0.715422	0.516469	29	2	12	0.528358	1.04313	11	9	17	1.94211	2.12029	Nucleus	0	0.001
IPI00021711	HLA-DPA1	HLA class II histocompatibility antigen, DP alpha chain precursor																7	2		0.744593		Plasma Membrane	1	0.995
IPI00021727	C4BPA	C4b-binding protein alpha chain precursor			1		6.65346								2		6.04896	16	3		0.496183		Extracellular Space	0	0.968	Yes
IPI00021728	EIF2S2	Eukaryotic translation initiation factor 2 subunit 2	35	14	2	1.28307	0.341859	40	6		0.752635		15	5	7	2.38293	1.16696	14	2		0.397116		Cytoplasm	0	0
IPI00021753	KIF13B	Kinesin-like protein KIF13B	1	1		2.11395				1		3.67117											Cytoplasm	0	0	Yes
IPI00021766	RTN4	Splice Isoform 1 of Reticulon-4	11	7	10	1.96627	4.79455	15		10		1.73198	29	3	27	0.775871	2.30537	8	7	47	2.03873	7.6199	Plasma Membrane	2	0	Yes
IPI00021785	COX5B	Cytochrome c oxidase polypeptide Vb, mitochondrial precursor	7					7					7					5		2		0.645951	Cytoplasm	0	0.843
IPI00021793	COX6A1	Cytochrome c oxidase polypeptide VIa-liver, mitochondrial precursor	6					6		3		1.28764	3										Plasma Membrane	1	0.131
IPI00021794	CTSA	Carrier family 6 , member 8 variant	11	2		0.621317		2	6	1	10.286	1.22372	2					15	6		0.99189		Extracellular Space	0	1	Yes
IPI00021800	CASP1	Splice Isoform Alpha of Caspase-1 precursor	1																				Cytoplasm	0	0	Yes
IPI00021805	MGST1	Microsomal glutathione S-transferase 1	37	6	2	0.535984	0.323866	17		1		0.203954						4	2	6	1.19135	1.92542	Plasma Membrane	1	0.001
IPI00021807	GBA	Glucosylceramidase precursor	4					16	10	2	2.98608	0.373079	2	2		5.28358		3					Cytoplasm	0	0.805	Yes
IPI00021808	HARS	Histidyl-tRNA synthetase	37	7		0.620929		19	4		1.04527		19	1		0.421269							Cytoplasm	0	0
IPI00021812	AHNAK	Neuroblast differentiation-associated protein AHNAK	7	4	2	1.73895	1.53836	9					4					264	62	2	0.583619	0.0146253	Nucleus	0	0	Yes
IPI00021827	DEFA3	Neutrophil defensin 3 precursor	2															34	7		0.524246		Extracellular Space	0	1	Yes
IPI00021828	CSTB	Cystatin B	9	11	2	3.65069	1.23069	9	6	1	3.0858	0.367117	10	3	2	2.11601	0.549906	5	11	4	4.71035	1.12524	Cytoplasm	0	0.009	Yes
IPI00021831	PRKAR1A	cAMP-dependent protein kinase type I-alpha regulatory subunit	1					46	2	7	0.233036	0.41911	6					6	3		1.20502		Cytoplasm	0	0
IPI00021833	PDGFA	Splice Isoform Long of Platelet-derived growth factor A chain precursor							2		10.9527			1		8.42537							Extracellular Space	0	1	Yes
IPI00021834	TFPI	Splice Isoform Alpha of Tissue factor pathway inhibitor precursor												46	51	342.567	129.749						Extracellular Space	0	0.998	Yes
IPI00021840	RPS6	40S ribosomal protein S6	6	1		0.603986		26	1	32	0.221346	3.20287	40	2	3	0.386604	0.209108	17	1		0.193243		Cytoplasm	0	0
IPI00021841	APOA1	Apolipoprotein A-I precursor		3	2	10.6837	12.3069	2		3		3.0045	5		50		21.204	10	13	52	3.0199	6.88804	Extracellular Space	0	1	Yes
IPI00021842	APOE	Apolipoprotein E precursor	11	15	9	4.11821	4.32343	25	68		13.0535				91		230.728	4	12	23	6.14809	6.81413	Extracellular Space	0	1	Yes
IPI00021854	APOA2	Apolipoprotein A-II precursor						2		4		3.89489			1		3.52448	2		2		1.2919	Extracellular Space	0	1	Yes
IPI00021857	APOC3	Apolipoprotein C-III precursor		1		4.2279									3		8.57344	2		12		6.08475	Extracellular Space	0	1	Yes
IPI00021885	FGA	Splice Isoform 1 of Fibrinogen alpha chain precursor			6		34.9208	2		1		1.22372	2		4		3.69931	31	13	15	1.03809	0.705244	Extracellular Space	0	0.999	Yes
IPI00021888	SLC39A7	Solute carrier family 39 (zinc tranSporter), member 7	5	2		1.24263							6		2		0.864138						Plasma Membrane	7	0.95
IPI00021890	HSD17B8	Estradiol 17-beta-dehydrogenase 8	5															6	1		0.49691		Cytoplasm	0	0.94
IPI00021891	FGG	Splice Isoform Gamma-B of Fibrinogen gamma chain precursor			17		97.1088	1		2		3.17117						51	22	40	1.06777	1.12527	Plasma Membrane	1	0.932	Yes
IPI00021907	MBP	Splice Isoform 1 of Myelin basic protein	1	2		3.7279		10					2					4					Extracellular Space	0	0	Yes
IPI00021917	RIPK2	Splice Isoform 1 of Receptor-interacting serine/threonine-protein kinase 2											2										Plasma Membrane	0	0.002	Yes
IPI00021923	FAM3C	Protein FAM3C precursor	11	13		3.58022		17	7	5	1.9908	0.797547		2		15.8507		11	7	2	1.52905	0.322976	Plasma Membrane	1	0.906	Yes
IPI00021924	H1FX	Histone H1x	4	3	4	2.13674	4.72277	2					4										Nucleus	0	0	Yes
IPI00021926	PSMC6	26S protease regulatory subunit S10B	24	1		0.169116		27		2		0.226512	26	1		0.312051		3	1		0.869593		Nucleus	0	0	Yes
IPI00021954	GBF1	Golgi-specific brefeldin A-resistance guanine nucleotide exchange factor 1											2		5		4.5408			4		6.75141	Cytoplasm	0	0
IPI00021975	TNFRSF10A	Tumor necrosis factor receptor superfamily member 10A precursor													1		3.52448						Plasma Membrane	1	0.986
IPI00021983	NCSTN	Splice Isoform 1 of Nicastrin precursor		2	2	7.4558	12.3069	2		7		6.56606						3	3	10	2.10878	3.84463	Plasma Membrane	1	0.997	Yes
IPI00021985	TM9SF4	Nonaspanin (TM9SF) family protein	8	6	1	2.26304	0.739273	2		2		2.11411	1		1		1.76224		1	9	3.47837	13.9407	Plasma Membrane	9	0
IPI00021997	CREG1	CREG1 protein precursor	2	2		2.48527		2	2	1	3.65089	1.22372							1		3.47837		Plasma Membrane	1	0.999	Yes
IPI00022002	MRPS27	Mitochondrial 28S ribosomal protein S27	4					7					6										Cytoplasm	0	0.247
IPI00022018	DPM1	Dolichol-phosphate mannosyltransferase	1																				Cytoplasm	0	0.001
IPI00022028	KIAA0280	Splice Isoform 1 of Protein KIAA0280			3		17.9604																Unknown	0	0
IPI00022033	RAB11FIP5	Rab11 family-interacting protein 5											2					1					Cytoplasm	0	0.051	Yes
IPI00022039	CD84	Leukocyte antigen CD84																1		1		1.21893	Plasma Membrane	1	0.999
IPI00022042	KIAA0241	KIAA0241 protein						1															Unknown	0	0.001
IPI00022048	PTGFRN	Prostaglandin F2 receptor negative regulator precursor	6	25	14	11.6711	11.4498			9		25.0405	3		25		16.028			11		16.8164	Plasma Membrane	1	1
IPI00022078	NDRG1	NDRG1 protein	64	25	9	1.25688	0.798171	7										22	5		0.582255		Nucleus	0	0
IPI00022082	39333	PREDICTED: septin 8	17	1		0.234883		8							3		8.57344			2		3.87571	Unknown	0	0
IPI00022095	PEG10	KIAA1051 protein						10					3										Nucleus	0	0
IPI00022107	LRFN1	PREDICTED: leucine rich repeat and fibronectin type III domain containing 1																		1		2.43785	Plasma Membrane	1	1
IPI00022143	FAM62A	Family with sequence similarity 62 (C2 domain containing), member A	56	7		0.413953		65	1	14	0.0905506	0.581763	24		5		0.544896	52	19	72	0.907341	1.97218	Plasma Membrane	2	0	Yes
IPI00022145	NUCKS1	Nuclear ubiquitous casein and cyclin-dependent kinases substrate		2		7.4558			6		30.858		14	5		2.54179		7	14		4.46215		Nucleus	0	0
IPI00022164	ARHGEF12	Splice Isoform 1 of Rho guanine nucleotide exchange factor 12											1										Cytoplasm	0	0	Yes
IPI00022200	COL6A3	AlphA 3 type VI collAgen isoform 1 precursor												8	95	60.403	240.826						Extracellular Space	0	1	Yes
IPI00022202	SLC25A3	Splice Isoform A of Phosphate carrier protein, mitochondrial precursor	6	5	7	2.4485	5.79632	6		9		3.57722	18		6		0.849836		8	19	20.827	28.3192	Plasma Membrane	2	0.001	Yes
IPI00022204	SERPINB3	Squamous cell carcinoma antigen 1								3		9.01351											Extracellular Space	0	0	Yes
IPI00022208	CEBPG	CCAAT/enhancer binding protein gamma						1															Nucleus	0	0.007
IPI00022215	ADNP	Activity-dependent neuroprotector						4					4		1		0.704896	6					Nucleus	0	0
IPI00022223	WNT5B	Wnt-5b protein precursor						1							14		36.3427						Extracellular Space	0	1
IPI00022228	HDLBP	Vigilin	20					36		1		0.0992208	30					7					Nucleus	0	0.005
IPI00022229	APOB	Apolipoprotein B-100 precursor		1	1	4.2279	6.65346			35		94.4909			97		245.875	15	107	225	16.6366	20.2823	Plasma Membrane	1	1	Yes
IPI00022239	METAP1	Methionine aminopeptidase 1	18	5		0.902079		1					3					4					Cytoplasm	0	0
IPI00022240	ISCU	Splice Isoform 1 of NifU-like N-terminal domain containing protein, mitochondrial precursor											4					7					Cytoplasm	0	0.759
IPI00022246	AZU1	Azurocidin precursor																50	8		0.408372		Extracellular Space	0	1
IPI00022254	ATG3	Splice Isoform 1 of Autophagy protein 3-like	2	3		3.56123				1		3.67117			2		6.04896						Cytoplasm	0	0	Yes
IPI00022255	OLFM4	GW112																7	4		1.36419		Extracellular Space	0	1	Yes
IPI00022256	AP2M1	Clathrin coat assembly protein AP50						1		3		4.50675	4		3		1.71469	5	6		2.64504		Cytoplasm	0	0
IPI00022265	CCDC22	Coiled-coil domain-containing protein 22											2					1					Unknown	0	0.001
IPI00022275	SACM1L	Suppressor of actin 1	4	5		3.4279							2		7		6.22379		2	10	5.95675	15.3785	Plasma Membrane	2	0
IPI00022276	MRPS28	Mitochondrial 28S ribosomal protein S28								2		6.34234											Cytoplasm	0	0.279
IPI00022277	CCDC56	HSPC009						2										1					Plasma Membrane	1	0
IPI00022282	NR3C1	Splice Isoform Alpha of Glucocorticoid receptor						7					1		1		1.76224						Nucleus	0	0	Yes
IPI00022284	PRNP	Major prion protein precursor		1		4.2279			1		5.97634		1	13	53	48.7649	67.3988		5	4	13.3919	6.75141	Plasma Membrane	2	0.997	Yes
IPI00022290	DEFB1	Beta-defensin 1 precursor																	1		3.47837		Extracellular Space	0	1	Yes
IPI00022300	METTL7A	Hypothetical protein FLJ14347																5	5	12	2.23198	3.04237	Plasma Membrane	1	0.276
IPI00022305	BZW2	MSTP017	1											1	2	8.42537	6.04896			3		5.31356	Cytoplasm	0	0
IPI00022314	SOD2	Superoxide dismutase [Mn], mitochondrial precursor	8					21	1	10	0.271652	1.25962	5					23	2	15	0.248198	0.940325	Cytoplasm	0	0.06	Yes
IPI00022316	MRPS18B	28S ribosomal protein S18b, mitochondrial precursor	9					6					13		2		0.432069	11					Cytoplasm	0	0.019
IPI00022320	MRPL42	Mitochondrial 28S ribosomal protein S32											2					10					Cytoplasm	0	0.009
IPI00022334	OAT	Ornithine aminotransferase, mitochondrial precursor	40	8		0.654224		49		4		0.233694	22		1		0.153238	21	3		0.383414		Cytoplasm	0	0.639	Yes
IPI00022340	CDK2AP1	Cyclin-dependent kinase 2-associated protein 1						2															Nucleus	0	0.571
IPI00022344	FLVCR1	Feline leukemia virus subgroup C receptor-related protein 1													1		3.52448						Plasma Membrane	10	0
IPI00022348	PML	Splice Isoform PML-1 of Probable transcription factor PML	4					10					5					24		10		0.615141	Nucleus	0	0
IPI00022350	C13orf15	RGC32 protein	1																				Extracellular Space	0	0.989
IPI00022370	CUTL2	Homeobox protein Cux-2						2					7										Nucleus	0	0.008
IPI00022371	HRG	Histidine-rich glycoprotein precursor						5							1		3.52448	2	1	7	1.15946	3.68833	Extracellular Space	0	1	Yes
IPI00022373	NOB1	ART-4 protein											2										Nucleus	0	0.023
IPI00022386	TXNDC9	Thioredoxin domain containing protein 9	4										2										Unknown	0	0
IPI00022388	DPYSL4	Dihydropyrimidinase-related protein 4						1															Cytoplasm	0	0
IPI00022391	APCS	Serum amyloid P-component precursor			8		46.2277								10		26.2448	1	3	4	4.21756	3.37571	Extracellular Space	0	0.996	Yes
IPI00022392	C1QA	Complement C1q subcomponent, A chain precursor													2		6.04896	2	1	7	1.15946	3.68833	Extracellular Space	0	0.976	Yes
IPI00022394	C1QC	Complement C1q subcomponent, C chain precursor																7	12	16	3.84256	3.00071	Extracellular Space	0	1	Yes
IPI00022395	C9	Complement component C9 precursor		1		4.2279									1		3.52448	5	5		2.23198		Extracellular Space	0	0.99	Yes
IPI00022402	FAM32A	Hypothetical protein DKFZp586O0120																1					Unknown	0	0
IPI00022403	MRPL13	39S ribosomal protein L13, mitochondrial	6					2					1					3					Cytoplasm	0	0.012
IPI00022417	LRG1	Leucine-rich alpha-2-glycoprotein precursor		5		17.1395			8		40.8107								1		3.47837		Extracellular Space	0	0.994	Yes
IPI00022418	FN1	Splice Isoform 1 of Fibronectin precursor		4		13.9116				48		129.216	20	333	781	117.793	93.9343	107	203	183	4.66768	2.44562	Extracellular Space	0	0.997	Yes
IPI00022420	RBP4	Plasma retinol-binding protein precursor		12		39.7348			8		40.8107							4					Extracellular Space	0	1	Yes
IPI00022421	COX7A2L	Cytochrome c oxidase subunit VIIa-related protein, mitochondrial precursor	1					2					3										Plasma Membrane	1	0.016
IPI00022429	ORM1	Alpha-1-acid glycoprotein 1 precursor		1		4.2279				2		6.34234	1		26		33.3183	6	4		1.55907		Extracellular Space	0	1	Yes
IPI00022431	AHSG	Alpha-2-HS-glycoprotein precursor		31		101.065			3		15.929			5	17	38.1269	43.9162	9	2		0.595675		Extracellular Space	0	1	Yes
IPI00022432	TTR	Transthyretin precursor		1		4.2279				1		3.67117						3					Extracellular Space	0	1	Yes
IPI00022434	ALB	ALB protein	3	83	16	67.2289	22.8638	8	44	35	24.4399	10.499		19	34	142.082	86.8324	170	233	108	3.38281	0.913966	Extracellular Space	0	1	Yes
[truncated: 4,469 more rows]
