# Supplementary material for: Proteomic Analysis of Ovarian Cancer Cells Reveals Dynamic Processes of Protein Secretion and Shedding of Extra-Cellular Domains
Source: PLoS One. 2008 Jun 18;3(6):e2425. doi: 10.1371/journal.pone.0002425 (PMC2409963; doi:10.1371/journal.pone.0002425)
Supplement: Table S2 — Proteins with high enrichment in the conditioned media of ovarian cancer cells. (0.05 MB XLS) [file pone.0002425.s003.xls]

## Sheet: TABLE S2
Table S2. Proteins with high enrichment in the conditioned media of ovarian cancer cells.
										mRNA expression data
				Protein Enrichment a						Ovarian Cancer / Normal c					Tissue expressiond
	IPI	Description	Entrez Gene	CaOV3	OVCAR3	ES2	Ascites Cells	Cellular location b		Serous	Mucinous	Endometrioid	Clear Cell		Higher expression e	Ovary / average f
1	IPI00374563	AGRIN	AGRN	19.972	47.112	22.7761	54.2285	ES		6.16641	4.00893	5.06541	6.34862		Colorectal Adenocarcinoma	0.383611
2	IPI00006608	AMYLOID BETA A4 PROTEIN	APP	-	24.9069	47.3607	5.95675	PM		1.62557	1.747	1.6956	1.96742		Prefrontal Cortex	0.569442
3	IPI00004656	BETA-2-MICROGLOBULIN	B2M	12.4793	15.4159	62.2114	5.27296	ES		1.37832	1.57649	1.46599	1.41096		Whole blood	0.52628
4	IPI00418163	COMPLEMENT COMPONENT 4B PREPROPROTEIN	C4B	20.9054	33.279	67.8284	12.7054	ES		-	-	-	-		Liver	1.66895
5	IPI00152540	CD109 ANTIGEN	CD109	10.1193	6.9558	30.7015	8.43512	ES		-	-	-	-		Bronchial epithelial cells	1.18152
6	IPI00290085	CADHERIN-2	CDH2	-	113.976	47.3607	10.9135	PM		1.40633	0.251323	0.668056	0.237066		Smooth Muscle	0.441337
7	IPI00019591	COMPLEMENT FACTOR B	CFB	115.456	30.0511	-	21.0396	ES		-	-	-	-		-	-
8	IPI00291867	COMPLEMENT FACTOR I	CFI	195.077	59.1022	-	6.69593	ES		-	-	-	-		-	-
9	IPI00007257	CALSYNTENIN 1 ISOFORM 2	CLSTN1	269.722	210.813	142.082	5.95675	PM		1.74455	1.72286	1.64881	2.97167		Prefrontal Cortex	0.155617
10	IPI00291262	CLUSTERIN	CLU	7.96451	32.7488	-	5.65242	ES		4.31259	0.866222	2.7943	1.77004		Prefrontal Cortex	0.0834873
11	IPI00028030	CARTILAGE OLIGOMERIC MATRIX PROTEIN	COMP	70.6687	10.6837	-	5.95675	ES		3.39109	1.42372	2.09336	27.9749		Adipocyte	0.250305
12	IPI00009294	CYSTEINE-RICH MOTOR NEURON 1 PROTEIN	CRIM1	30.858	42.9627	30.7015	10.9135	PM		1.39986	1.76795	1.15013	1.13313		Placenta	0.499112
13	IPI00013874	GROWTH-REGULATED PROTEIN ALPHA	CXCL1	5.97634	10.6837	171.784	7.63512	ES		3.09375	3.49178	2.91735	2.63432		Smooth Muscle	0.0517101
14	IPI00004946	CHEMOKINE (C-X-C MOTIF) LIGAND 16	CXCL16	10.9527	23.5953	-	15.8702	PM		-	-	-	-		Lung	0.693965
15	IPI00006273	CYR61 PROTEIN	CYR61	145.314	78.4696	17.0422	6.94233	ES		0.290268	0.230582	0.265706	0.227708		Uterus	0.697942
16	IPI00025846	DESMOCOLLIN-2	DSC2	25.8817	7.52592	-	5.95675	PM		5.61827	6.14904	5.10021	4.95373		Tongue	0.777801
17	IPI00003351	EXTRACELLULAR MATRIX PROTEIN 1	ECM1	145.314	4.2279	82.6791	6.69593	PM		1.36456	1.60996	1.51631	1.18102		Tongue	0.386472
18	IPI00029658	EGF-CONTAINING FIBULIN-LIKE EXTRACELLULAR MATRIX PROTEIN 1	EFEMP1	200.054	49.4185	38.1269	10.9135	ES		0.21433	0.205415	0.209926	0.406677		Cardiac Myocytes	1.74816
19	IPI00021081	FOLLISTATIN	FST	-	32.529	13.2444	20.827	ES		1.21985	0.783245	0.66925	0.838846		Bronchial epithelial cells	0.923294
20	IPI00029723	FOLLISTATIN-RELATED PROTEIN 1	FSTL1	175.172	24.6586	134.657	18.3486	ES		0.665726	0.817884	0.724675	0.702506		Smooth Muscle	0.934468
21	IPI00025155	FOLLISTATIN-RELATED PROTEIN 3	FSTL3	15.929	49.4185	15.8507	5.95675	ES		0.769257	0.663078	0.720254	0.733066		Placenta	0.499533
22	IPI00219038	HISTONE H33	H3F3A	65.6924	36.5069	-	13.3919	-		1.37578	1.29216	1.38477	1.10433		Whole blood	0.358104
23	IPI00217467	HISTONE H14	HIST1H1E	1.99211	26.8232	45.5522	25.7837	N		0.961798	1.35532	0.981541	0.520662		PB-CD19+Bcells	0.671955
24	IPI00024284	BASEMENT MEMBRANE-SPECIFIC HEPARAN SULFATE PROTEOGLYCAN CORE PROTEIN	HSPG2	652.9	13.4116	-	20.2525	ES		3.30079	5.0453	3.14158	4.04449		Smooth Muscle	0.250929
25	IPI00297284	INSULIN-LIKE GROWTH FACTOR-BINDING PROTEIN 2	IGFBP2	45.787	165.123	15.8507	20.2135	ES		1.58785	0.70309	1.01553	0.330788		Leukemia lymphoblastic	0.621166
26	IPI00018305	INSULIN-LIKE GROWTH FACTOR-BINDING PROTEIN 3	IGFBP3	15.929	120.432	30.7015	5.0996	ES		0.404824	0.39417	0.498951	2.33328		Placenta	3.59142
27	IPI00016915	INSULIN-LIKE GROWTH FACTOR-BINDING PROTEIN 7	IGFBP7	80.6214	33.279	90.1045	8.43512	ES		1.11396	1.58977	1.24218	2.58049		Thyroid	0.725265
28	IPI00023845	KALLIKREIN-6	KLK6	135.361	40.1441	-	15.0369	ES		8.61004	2.31466	3.34926	3.04346		Spinal Cord	0.221602
29	IPI00028600	KALLIKREIN-7	KLK7	175.172	55.8743	-	45.6107	ES		22.3971	2.69273	7.29625	1.95637		Tongue	0.581741
30	IPI00016041	KALLIKREIN 9	KLK9	5.97634	34.3929	-	13.3919	ES		68.1235	7.49003	19.8695	37.9788		Ovary	1.27627
31	IPI00477868	LAMA5 PROTEIN	LAMA5	25.3817	12.4546	-	9.37723	ES		8.98533	2.75048	6.813	16.6129		Colorectal Adenocarcinoma	0.330627
32	IPI00298281	LAMININ SUBUNIT GAMMA-1	LAMC1	60.7161	35.7569	20.991	7.28728	ES		1.60623	0.839436	1.3991	6.94626		Smooth Muscle	0.431279
33	IPI00023673	GALECTIN-3-BINDING PROTEIN	LGALS3BP	12.1618	2.90839	93.3172	6.88138	ES		3.42986	3.21488	2.89303	2.49303		Lung	0.417117
34	IPI00293303	LEGUMAIN	LGMN	12.2755	-	8.42537	15.8702	ES		1.06475	1.25688	1.16517	2.169		Placenta	0.334378
35	IPI00176637	UNCHARACTERIZED PROTEIN ENSP00000249480	LOC728350	30.858	-	38.1269	5.95675	-		-	-	-	-		-	-
36	IPI00328218	LIPOLYSIS-STIMULATED LIPOPROTEIN RECEPTOR	LSR	70.6687	87.6533	-	15.8702	PM		-	-	-	-		-	-
37	IPI00220249	LATENT-TRANSFORMING GROWTH FACTOR BETA-BINDING PROTEIN	LTBP1	5.97634	23.5953	8.42537	5.95675	ES		0.717081	0.742801	0.848982	0.542301		BM-CD105+Endothelial	0.568612
38	IPI00010333	MIDKINE	MDK	80.6214	91.3812	4.52189	25.7837	PM		0.886702	0.551569	1.09158	0.757619		Colorectal Adenocarcinoma	2.60161
39	IPI00028908	NIDOGEN-2	NID2	65.6924	84.9254	-	10.9135	ES		0.305759	0.6991	0.317091	1.777		Cardiac Myocytes	0.501489
40	IPI00011140	PROTEIN NOV HOMOLOG	NOV	25.8817	17.1395	8.42537	28.2621	ES		1.85801	1.56301	1.73595	1.34909		Adrenal gland	0.296518
41	IPI00296180	UROKINASE-TYPE PLASMINOGEN ACTIVATOR	PLAU	15.2623	20.7767	40.0364	10.9135	ES		3.3813	1.72531	2.28965	2.33782		Bronchialepithelial cells	0.408549
42	IPI00010676	UROKINASE PLASMINOGEN ACTIVATOR SURFACE RECEPTOR	PLAUR	25.8817	17.1395	9.75299	16.979	ES		2.14298	3.37578	1.97624	1.49374		Smooth Muscle	0.852708
43	IPI00022284	MAJOR PRION PROTEIN	PRNP	5.97634	4.2279	48.7649	13.3919	PM		0.694321	0.552128	0.598534	0.509997		Amygdala	0.142477
44	IPI00294004	VITAMIN K-DEPENDENT PROTEIN S	PROS1	20.9054	46.1906	-	23.3054	ES		0.167612	0.188695	0.118538	0.115747		Fetal Liver	2.27393
45	IPI00013179	PROSTAGLANDIN-H2 D-ISOMERASE	PTGDS	25.8817	7.4558	-	28.2621	ES		4.10494	1.41787	2.57737	2.482		Testis Germ Cell	0.0279228
46	IPI00003590	ISOFORM 1 OF SULFHYDRYL OXIDASE 1	QSOX1	90.5741	126.388	564.828	13.3919	PM		-	-	-	-		-	-
47	IPI00019176	RETINOIC ACID RECEPTOR RESPONDER PROTEIN 2	RARRES2	145.314	23.5953	-	13.3919	ES		0.212629	0.113485	0.146398	0.0604163		Liver	0.563643
48	IPI00011564	SYNDECAN-4	SDC4	10.9527	7.4558	-	30.7405	PM		3.12202	3.65477	2.34914	5.80025		Bronchial epithelial cells	0.171664
49	IPI00291866	PLASMA PROTEASE C1 INHIBITOR	SERPING1	60.7161	7.4558	8.42537	11.8991	ES		0.909866	0.207291	0.538021	0.774006		Liver	4.64186
50	IPI00008580	ANTILEUKOPROTEINASE	SLPI	15.929	323.79	-	38.1756	ES		20.8283	14.9	16.1912	49.6346		Trachea	0.0346791
51	IPI00014572	SPARC	SPARC	172.846	-	84.4876	10.9135	ES		1.06918	1.10527	0.900295	0.87309		Cardiac Myocytes	0.212369
52	IPI00006128	TESTICAN-2	SPOCK2	48.0793	35.5736	-	18.3486	ES		4.49948	1.00125	1.88539	1.20879		Prefrontal Cortex	0.0459491
53	IPI00019372	SERGLYCIN	SRGN	85.5977	-	52.4776	10.6092	ES		-	-	-	-		-	-
54	IPI00009198	TISSUE FACTOR PATHWAY INHIBITOR 2	TFPI2	45.787	7.4558	18.0209	6.94233	ES		0.779432	0.697157	0.92019	1.73271		Placenta	0.0746074
55	IPI00296099	THROMBOSPONDIN-1	THBS1	135.361	36.5069	52.1443	50.5675	ES		1.26084	1.25309	1.29379	1.34409		Cardiac Myocytes	1.16753
56	IPI00032292	METALLOPROTEINASE INHIBITOR 1	TIMP1	642.948	52.6464	231.187	20.9864	ES		0.898492	1.23449	0.842288	1.02354		Cardiac Myocytes	2.49782
57	IPI00027166	METALLOPROTEINASE INHIBITOR 2	TIMP2	150.29	168.851	112.381	13.3919	ES		0.51637	0.321318	0.381228	1.16455		Placenta	0.175912
58	IPI00031008	TENASCIN	TNC	-	26.8232	283.164	85.2647	PM		3.23265	2.34874	3.78039	0.956284		Uterus	0.331228
59	IPI00010277	TUMOR NECROSIS FACTOR RECEPTOR SUPERFAMILY MEMBER 12A	TNFRSF12A	15.929	13.9116	67.8284	5.95675	PM		2.77041	2.76531	1.93516	3.01206		Bronchialepithelial cells	0.352053
60	IPI00103636	WAP FOUR-DISULFIDE CORE DOMAIN PROTEIN 2	WFDC2	70.6687	47.6391	-	22.6387	ES		29.958	8.74375	29.9442	21.7671		Trachea	0.0565272
a The enrichment was calculated based on the ratio of normalized spectral count in conditioned media over total cell extract.
b ES (extracellular Space); PM (Plasma Membrane); N(Nucleus), - (unknown)
c mRNA expression in the different subtypes of ovarian cancer tissue was obtained from Schwartz et al. [35]
d mRNA expression in different tissues was obtained from Symatlas (www.symatlas.org) [31].
e Tissue where the particular gene has the highest expression among 79 different human tissues.
f ratio of the particular gene expression in ovary tissue in relation to the average gene expression in all the 79 human tissues present in the databank
