# Supplementary material for: Proteomic Analysis of Ovarian Cancer Cells Reveals Dynamic Processes of Protein Secretion and Shedding of Extra-Cellular Domains
Source: PLoS One. 2008 Jun 18;3(6):e2425. doi: 10.1371/journal.pone.0002425 (PMC2409963; doi:10.1371/journal.pone.0002425)
Supplement: Table S4 — Membrane proteins enriched in both cell surface and culture media or exclusively in cell surface. (0.07 MB XLS) [file pone.0002425.s005.xls]

## Sheet: TABLE S4
Table S4. Membrane proteins enriched in both cell surface and culture media or exclusively in cell surface.
			PROTEIN ENRICHMENT a														mRNA expression data
			OVCAR3			CaOV3			ES2			ASCITES CELLS					Ovarian Cancer / Normal b					Tissue expression c
IPI	Gene Name	Description	Secreted / Total Extract	Surface / Total Extract		Secreted / Total Extract	Surface / Total Extract		Secreted / Total Extract	Surface / Total Extract		Secreted / Total Extract	Surface / Total Extract				Serous	Mucinous	Endometrioid	Clear Cell		Higher expression d	Ovary / average e	IPA annotated function f
a) Proteins enriched (>10-fold) in both cell surface in the culture media
IPI00013897	ADAM10	ADAM 10	2.86055	3.97742		1.99211	3.0045		30.7015	54.0141		0.316216	5.45018				1.90669	2.31626	1.67536	2.29725		BM-CD33+Myeloid	0.457672	b,d,h
IPI00440932	ADAM9	ISOFORM 1 OF ADAM 9	30.0511	17.9604			3.67117		82.1791	11.8602		1.73919	3.37571				1.26826	2.38041	1.72156	1.93668		SmoothMuscle	0.364553	b
IPI00022229	APOB	APOLIPOPROTEIN B-100	4.2279	6.65346			94.4909			245.875		16.6366	20.2823				0.938611	1.57668	1.08639	1.07956		fetalliver	0.0516237	d
IPI00006608	APP	ISOFORM APP770 OF AMYLOID BETA A4 PROTEIN PRECURSOR (FRAGMENT).	24.9069	2.68621					47.3607	81.1167		5.95675					1.62557	1.747	1.6956	1.96742		ColorectalAdenocarcinoma	0.613322	b,c,d,h
IPI00007426	ARL6IP5	PRA1 FAMILY PROTEIN 3.	1.06511	0.950494			0.734234			1.20979		10.9135	34.0706				0.743402	0.973328	0.870043	0.566091		PB-CD56+NKCells	0.247344
IPI00296992	AXL	AXL RECEPTOR TYROSINE KINASE ISOFORM 1.				5.97634			52.9776	13.6224							0.933143	0.800919	0.824046	0.911481		ColorectalAdenocarcinoma	0.67692	b,c,d,h,i
IPI00215767	B4GALT1	ISOFORM LONG OF BETA-1,4-GALACTOSYLTRANSFERASE 1.	49.4185			95.5504	17.027		8.42537			0.695675					0.874102	0.850698	0.842158	1.28519		SmoothMuscle	1.35542	b,c,d,h
IPI00026241	BST2	BONE MARROW STROMAL ANTIGEN 2					1.58558					10.9135	24.0057				0.438163	0.215092	0.323636	0.200161		721_B_lymphoblasts	3.56833	h
IPI00294395	C8B	COMPLEMENT COMPONENT C8 BETA CHAIN		6.65346			14.3558			71.6855		30.7405	28.3192				1.91477	2.28628	2.02429	2.02249		Liver	0.33705
IPI00410488	CD276	ISOFORM 1 OF CD276 ANTIGEN	10.6837	29.2673			4.78528						6.75141				-	-	-	-		-	-	h
IPI00290085	CDH1	EPITHELIAL CADHERIN	2.71709	3.71694		7.89139	5.79536			3.52448		18.5081	15.6704				11.3845	14.0128	11.0702	27.0887		BM-CD105+Endothelial	0.578419
IPI00290085	CDH2	NEURAL CADHERIN	113.976						47.3607	13.7972		10.9135	16.8164				1.40633	0.251323	0.668056	0.237066		SmoothMuscle	0.441337	b,c,d,h,i
IPI00007257	CLSTN1	CALSYNTENIN 1 ISOFORM 2.	210.813	51.8811		269.722	81.1351		142.082	74.21		5.95675					1.74455	1.72286	1.64881	2.97167		PrefrontalCortex	0.155617
IPI00396423	CLSTN3	ALCADEIN BETA.	13.9116			155.266	22.3694										0.764477	0.604422	0.801532	0.603122		Amygdala	0.498803
IPI00016703	DHCR24	24-DEHYDROCHOLESTEROL REDUCTASE	13.9116	17.9604			1.46058			1.51224		2.97837	3.37571				4.17238	2.54201	2.15913	3.75186		adrenalgland	0.304749	h,i
IPI00014260	DMBT1	ISOFORM 3 OF DELETED IN MALIGNANT BRAIN TUMORS 1 PROTEIN	4.2279			100.527	35.7252										1.45373	3.24163	1.55776	1.27132		Trachea	0.221066	i
IPI00025753	DSG1	DESMOGLEIN-1	17.1395	17.9604			1.22372						17.0353				0.933794	1.07547	1.05627	1.18638		skin	0.569492
IPI00028931	DSG2	DESMOGLEIN-2	3.26494	3.59662		1.9909	14.8711			3.52448		15.8702	35.5085				2.79379	3.45509	2.31643	1.53464		bronchialepithelialcells	0.195763	b,i
IPI00003351	ECM1	EXTRACELLULAR MATRIX PROTEIN 1	4.2279			145.314	3.67117		82.6791	38.8672		6.69593					1.36456	1.60996	1.51631	1.18102		TONGUE	0.386472	h,i
IPI00004047	EXT2	ISOFORM 1 OF EXOSTOSIN-2.							30.7015	21.1959							0.841059	0.811446	0.787663	0.823857		bronchialepithelialcells	0.46141	i
IPI00021048	FER1L3	ISOFORM 1 OF MYOFERLIN.	104.293	46.2277			0.333848			1.0426		0.549527	4.3949				3.67752	3.03167	2.70957	4.88166		CardiacMyocytes	0.630833
IPI00029625	FLOT2	FLOTILLIN 2.	13.9116	17.9604			1.26847			3.52448		5.95675	8.18927				1.48666	1.83917	1.55099	3.80393		WHOLEBLOOD	0.474515
IPI00103286	IMP5	INTRAMEMBRANE PROTEASE 5.							38.1269	18.6714							-	-	-	-		Testis	1.16944
IPI00013744	ITGA2	INTEGRIN ALPHA-2	11.093	28.6006			12.9216			18.8462			13.9407				1.62377	2.76666	1.72399	3.47408		bronchialepithelialcells	0.613817	b,c,d,g,h
IPI00027087	L1CAM	ISOFORM 1 OF NEURAL CELL ADHESION MOLECULE L1	7.4558	51.8811		4.72782	5.40484					53.785	29.976				4.9527	1.68181	1.61515	3.39203		PrefrontalCortex	0.637619	b,d,g,i
IPI00073196	LTBP3	ISOFORM 1 OF LATENT-TRANSFORMING GROWTH FACTOR BETA-BINDING PROTEIN 3	42.9627			5.97634			75.2537	48.9651							0.873382	0.341211	0.537356	0.212318		Thyroid	0.4042
IPI00010333	MDK	MIDKINE	91.3812	23.6138		80.6214			4.52189	0.90816		25.7837					0.886702	0.551569	1.09158	0.757619		ColorectalAdenocarcinoma	2.60161	d,h
IPI00025110	MSLN	ISOFORM 2 OF MESOTHELIN	2.23497	10.4424		21.0006	0.367117					15.8702	38.3842				93.8536	17.2574	15.1648	22.0414		Lung	0.589471	i
IPI00023814	NEO1	ISOFORM 1 OF NEOGENIN				15.929	27.7117			16.1469			6.75141				1.55789	1.17345	1.31479	0.831395		fetalbrain	0.568341	b,d
IPI00177543	PAM	UNCHARACTERIZED PROTEIN PAM.							15.8507	16.1469							0.595511	0.799291	0.849719	0.519992		salivarygland	0.536467
IPI00022284	PRNP	MAJOR PRION PROTEIN	4.2279			5.97634			48.7649	67.3988		13.3919	6.75141				0.694321	0.552128	0.598534	0.509997		Amygdala	0.292256	c,d,h,i
IPI00022048	PTGFRN	PROSTAGLANDIN F2 RECEPTOR NEGATIVE REGULATOR	11.6711	11.4498			25.0405			16.028			16.8164				-	-	-	-		SmoothMuscle	0.639835
IPI00107831	PTPRF	RECEPTOR-TYPE TYROSINE-PROTEIN PHOSPHATASE F	2.48527			2.37369	6.85758		45.5522	64.112		38.1756	98.774				7.64521	4.86733	5.82002	5.72432		CardiacMyocytes	0.682234	b,c,d,h,i
IPI00016112	PXDN	PEROXIDASIN HOMOLOG.	143.028	17.9604		110.479	59.7657		52.9776	48.9651							0.98711	0.666581	0.737546	0.383863		-	-
IPI00003590	QSOX1	ISOFORM 1 OF SULFHYDRYL OXIDASE 1	126.388	11.8069		90.5741	14.3558		564.828	145.658		13.3919					-	-	-	-		-	-	h
IPI00168358	RGMB	RGM DOMAIN FAMILY, MEMBER B ISOFORM 2	4.2279						30.7015	11.0979							-	-	-	-		fetalbrain	0.762609	b
IPI00027434	RHOC	RHO-RELATED GTP-BINDING PROTEIN RHOC				10.9527	11.6847										0.609324	0.97147	0.600982	0.544771		SmoothMuscle	0.826521	d,i
IPI00306382	SCAMP3	ISOFORM 1 OF SECRETORY CARRIER-ASSOCIATED MEMBRANE PROTEIN 3.	3.33901	2.62376						2.62448		10.9135	35.5085				1.63948	1.35842	1.42336	1.6614		721_B_lymphoblasts	0.344635
IPI00011564	SDC4	SYNDECAN-4	7.4558			10.9527						30.7405	12.5028				3.12202	3.65477	2.34914	5.80025		bronchialepithelialcells	0.171664	c,d,g
IPI00749245	SFRP1	SECRETED FRIZZLED-RELATED PROTEIN 1				20.9054			74.7537	27.0071							0.815061	1.41668	0.880448	1.87714		salivarygland	0.890031	d,h,i
IPI00022202	SLC25A3	ISOFORM A OF PHOSPHATE CARRIER PROTEIN, MITOCHONDRIAL	2.4485	5.79632			3.57722			0.849836		20.827	28.3192				0.82078	0.845665	0.759643	0.713941		Heart	0.30741
IPI00007188	SLC25A5	ADP/ATP TRANSLOCASE 2.	1.76495	3.26626		0.692566	4.68899		15.8507	41.3917		1.07933	1.91958				1.41606	1.40868	1.16373	0.982828		lymphomaburkittsRaji	0.204538	i
IPI00219663	TCIRG1	ISOFORM SHORT OF VACUOLAR PROTON TRANSLOCATING ATPASE 116 KDA SUBUNIT A ISOFORM 3.	4.2279	12.3069			6.34234					10.9135	28.3192				1.22949	1.89461	1.27128	1.43634		PB-CD14+Monocytes	0.0856604	d,h,i
IPI00018219	TGFBI	TRANSFORMING GROWTH FACTOR-BETA-INDUCED PROTEIN IG-H3				160.243	14.3558					15.8702	6.75141				2.44435	1.91315	1.90534	1.32538		SmoothMuscle	0.0782953	b,d,g,h
IPI00101374	TM9SF1	TRANSMEMBRANE 9 SUPERFAMILY PROTEIN MEMBER 1								6.04896		10.9135	19.6921				1.41608	1.17824	1.30703	1.89498		Thyroid	0.416195
IPI00031008	TNC	ISOFORM 1 OF TENASCIN	26.8232				3.67117		283.164	435.211		85.2647	42.6978				3.23265	2.34874	3.78039	0.956284		Uterus	0.657314	b,c,d,g,h,i
IPI00007798	TRHDE	THYROTROPIN-RELEASING HORMONE-DEGRADING ECTOENZYME.	97.837	46.2277			3.67117			28.7693							0.336113	0.541262	0.337008	0.336757		WholeBrain	0.909409
b) Proteins exclusively enriched (>20-fold) in the cell surface and not detected enriched in the culture media
IPI00186903	APOL1	ISOFORM 2 OF APOLIPOPROTEIN-L1								31.2938			3.87571				2.57838	4.46976	2.13167	18.3085		721_B_lymphoblasts	0.572957
IPI00302840	ATP1A3	SODIUM/POTASSIUM-TRANSPORTING ATPASE SUBUNIT ALPHA-3.				5.97634							134.72				0.986525	0.969186	0.889367	1.04696		Amygdala	0.0937111	f
IPI00735844	C11orf41	PREDICTED: SIMILAR TO MUCIN 17.		12.3069						43.9162							1.4966	1.65008	1.43078	1.33024		-	-
IPI00293730	CCR6	C-C CHEMOKINE RECEPTOR TYPE 6.								31.2938							1.12132	1.47971	1.15979	1.1528		PB-CD19+Bcells	0.551283
IPI00022881	CLTCL1	ISOFORM 1 OF CLATHRIN HEAVY CHAIN 2.											49.887				0.8986	0.703103	0.786768	0.800855		Testis	0.579793
IPI00419836	DCBLD2	ISOFORM 1 OF DISCOIDIN, CUB AND LCCL DOMAIN-CONTAINING PROTEIN 2		23.6138						16.6591							0.629159	0.247779	0.439898	0.192895		UterusCorpus	0.636086
IPI00184311	ENPP1	ECTONUCLEOTIDE PYROPHOSPHATASE/PHOSPHODIESTERASE FAMILY MEMBER 1.								48.9651							0.811286	0.861189	0.767604	0.657699		CardiacMyocytes	0.697609
IPI00023502	FCGR1A	ISOFORM A OF HIGH AFFINITY IMMUNOGLOBULIN GAMMA FC RECEPTOR I											21.13				1.56554	0.982994	1.48575	1.36286		CardiacMyocytes	0.684089	a,c,e,f
IPI00021891	FGG	ISOFORM GAMMA-B OF FIBRINOGEN GAMMA CHAIN		97.1088			3.17117					1.06777	1.12527				0.721827	0.990345	0.675116	1.81884		fetalliver	0.224686	a,b
IPI00414717	GLG1	GOLGI APPARATUS PROTEIN 1.								33.8183			1.17485				1.17197	1.64717	1.45971	1.64116		PLACENTA	0.736923	f
IPI00296936	GLIPR1	GLIOMA PATHOGENESIS-RELATED PROTEIN 1					3.67117			26.2448							0.877723	1.0614	1.05119	0.674023		-	-
IPI00337325	HMMR	ISOFORM A OF HYALURONAN MEDIATED MOTILITY RECEPTOR.								41.3917							2.7662	2.57267	2.6525	3.12787		721_B_lymphoblasts	0.163236	d,f
IPI00395826	HPN	SERINE PROTEASE HEPSIN.					33.054										4.36119	1.43648	3.54689	5.19709		Liver	0.226455
IPI00016890	IGSF3	IMMUNOGLOBULIN SUPERFAMILY, MEMBER 3 ISOFORM 1.		29.2673			6.34234						6.75141				2.21296	2.94208	2.49444	15.2693		fetalbrain	0.254514
IPI00010697	ITGA6	ISOFORM ALPHA-6X1X2B OF INTEGRIN ALPHA-6		2.9934			25.0405			9.74801			18.2542				1.84392	5.27945	2.67689	1.9988		bronchialepithelialcells	0.282681	b,c,d,e
IPI00027505	ITGAV	ISOFORM 1 OF INTEGRIN ALPHA-V	0.57965	4.0462			33.8896			25.7448		0.304361	4.63039				0.744793	0.591638	0.640919	0.571661		SmoothMuscle	0.534696	a,b,c,d,e
IPI00292530	ITIH1	INTER-ALPHA-TRYPSIN INHIBITOR HEAVY CHAIN H1	4.2279				19.6982			48.9651		3.17405	2.50057				1.50388	1.95609	1.48383	1.52146		Liver	0.115636
IPI00242962	KIAA1618	ISOFORM 1 OF PROTEIN ALO17.					35.7252										-	-	-	-		Ovary	1.20322
IPI00221240	LNPEP	ISOFORM 2 OF LEUCYL-CYSTINYL AMINOPEPTIDASE.	1.86395				11.6847			3.52448			22.5678				1.63825	1.48086	1.70079	1.90684		PLACENTA	0.511758
IPI00743585	LOC647859	UNCHARACTERIZED PROTEIN HLA-DRB2.	0.84558	4.72277			2.33694						24.0057				-	-	-	-		-	-
IPI00016334	MCAM	ISOFORM 1 OF CELL SURFACE GLYCOPROTEIN MUC18		29.2673													1.29125	1.18588	1.15739	1.01416		ADIPOCYTE	1.41907	b
IPI00247063	MME	NEPRILYSIN.								31.2938							0.848228	0.983731	1.24985	1.26134		ADIPOCYTE	0.318453	b,d,f
IPI00003373	OCLN	OCCLUDIN.	0.84558	4.72277			2.33694						24.0057				2.59798	3.50802	2.19033	2.88167		Thyroid	0.651534	f
IPI00398020	ODZ3	TENEURIN-3.	3.56123	5.98679			25.0405					1.98558	11.3569				1.58543	0.715818	1.38943	1.26474		PLACENTA	0.579218
IPI00022661	PVRL2	ISOFORM DELTA OF POLIOVIRUS RECEPTOR-RELATED PROTEIN 2		68.8415			19.6982			16.1469							1.64175	1.39052	1.35853	1.40563		Lung	0.78738	b
IPI00015473	SLC1A3	EXCITATORY AMINO ACID TRANSPORTER 1.					6.34234						22.5678				1.29094	0.462099	1.01994	0.621081		PrefrontalCortex	0.0394545	d
IPI00291467	SLC25A6	ADP/ATP TRANSLOCASE 3.		74.495			105.176		0.689163	1.68988			32.6328				0.765755	0.955657	0.823247	0.83535		lymphomaburkittsRaji	0.742264
IPI00298702	SLC39A6	ISOFORM 1 OF ZINC TRANSPORTER SLC39A6								23.7203			2.43785				0.534898	0.460454	0.656551	0.42857		PB-BDCA4+Dentritic_Cells	0.35727
IPI00297492	STT3A	DOLICHYL-DIPHOSPHOOLIGOSACCHARIDE--PROTEIN GLYCOSYLTRANSFERASE SUBUNIT STT3A.	3.56123							4.23917			26.8814				-	-	-	-		-	-
IPI00009225	STX8	SYNTAXIN-8.											21.13				0.406242	0.497773	0.458531	0.393873		PB-CD56+NKCells	0.396347
IPI00021302	SUSD2	SUSHI DOMAIN-CONTAINING PROTEIN 2		21.0627			22.3694										-	-	-	-		-	-
IPI00030847	TM9SF3	TRANSMEMBRANE 9 SUPERFAMILY PROTEIN MEMBER 3	5.09185										22.5678				-	-	-	-		-	-
IPI00026111	TMCO1	ISOFORM 1 OF TRANSMEMBRANE AND COILED-COIL DOMAIN-CONTAINING PROTEIN 1.					25.0405			3.02448			8.18927				1.10908	1.17712	1.06142	1.17524		-	-
IPI00016608	TMED2	TRANSMEMBRANE EMP24 DOMAIN-CONTAINING PROTEIN 2	1.92142	0.647733			27.7117			2.21959		1.03014	0.187527				1.20686	1.34532	1.37784	1.40831		-	-
IPI00170706	TMEM2	TRANSMEMBRANE PROTEIN 2.											26.8814				1.90828	4.28345	2.6379	4.05602		PLACENTA	0.347946
IPI00296379	TNFRSF10B	ISOFORM LONG OF TUMOR NECROSIS FACTOR RECEPTOR SUPERFAMILY MEMBER 10B		12.3069						21.1959							1.03218	1.82941	1.44507	1.9506		721_B_lymphoblasts	0.776216	a,e,f
IPI00009111	TPBG	TROPHOBLAST GLYCOPROTEIN					6.92792			31.2938			3.87571				1.67537	2.21066	2.85728	2.96892		bronchialepithelialcells	0.207451
a The enrichment was calculated based on the ratio of normalized spectral count in conditioned media over total cell extract.
b mRNA expression in the different subtypes of ovarian cancer tissue was obtained from Schwartz et al. [35]
c mRNA expression in different tissues was obtained from Symatlas (www.symatlas.org) [31].
d Tissue where the particular gene has the highest expression among 79 different human tissues.
e ratio of the particular gene expression in ovary tissue in relation to the average gene expression in all the 79 human tissues present in the databank
f (a)activation, (b)adhesion, (c)binding, (d)cell movement, (e)cell surface receptor linked signal transduction, (f)inflammatory disorder, (g)cell spreading, (h)proliferation, (i)tumorigenesis
